# Supplementary material
Source: PubMed Central journal article supplement (PMC4024202)

# Supporting Information

## Total Synthesis of Bisabosqual A

Christopher W. am Ende, Zhou Zhou and Kathlyn A. Parker\*

Department of Chemistry, State University of New York at Stony Brook,  
Stony Brook, New York, 11794

### Contents:

|                                                              |           |
|--------------------------------------------------------------|-----------|
| General Methods.....                                         | S3        |
| Scheme S1.....                                               | S4        |
| Schemes S2-4.....                                            | S5        |
| Experimental Procedures and Characterization.....            | S6 – S15  |
| Compound <b>12</b> .....                                     | S6        |
| Compound <b>9</b> .....                                      | S6        |
| Compound <b>S2</b> .....                                     | S6        |
| Compound <b>S4</b> .....                                     | S7        |
| Compound <b>10</b> .....                                     | S7        |
| Compound <b>S6</b> .....                                     | S7        |
| Compound <b>11</b> .....                                     | S7        |
| Compound <b>8</b> .....                                      | S8        |
| Compound <b>13</b> .....                                     | S8        |
| Compound <b>7b</b> .....                                     | S9        |
| Compound <b>6b</b> .....                                     | S9        |
| Compound <i>C-7-epi-6b</i> .....                             | S9        |
| Compound <b>S7</b> .....                                     | S11       |
| Compound <b>14</b> .....                                     | S11       |
| Compound <b>16</b> .....                                     | S11       |
| Compound <b>S8</b> .....                                     | S12       |
| Compound <b>17</b> .....                                     | S12       |
| Compound <b>5</b> .....                                      | S13       |
| Compound <b>S9</b> .....                                     | S14       |
| Bisabosqual A ( <b>1</b> ).....                              | S14       |
| Comparison of Natural and Synthetic Bisabosqual A.....       | S15       |
| <sup>1</sup> H and <sup>13</sup> C Spectra of Compounds..... | S16 – S46 |
| Compound <b>9</b> - <sup>1</sup> H NMR.....                  | S16       |

|                                                                 |     |
|-----------------------------------------------------------------|-----|
| Compound <b>9</b> - $^{13}\text{C}$ NMR.....                    | S17 |
| Compound <b>10</b> - $^1\text{H}$ NMR.....                      | S18 |
| Compound <b>10</b> - $^{13}\text{C}$ NMR.....                   | S19 |
| Compound <b>11</b> - $^1\text{H}$ NMR.....                      | S20 |
| Compound <b>11</b> - $^{13}\text{C}$ NMR.....                   | S21 |
| Compound <b>8</b> - $^1\text{H}$ NMR.....                       | S22 |
| Compound <b>8</b> - $^{13}\text{C}$ NMR.....                    | S23 |
| Compound <b>13</b> - $^1\text{H}$ NMR.....                      | S24 |
| Compound <b>13</b> - $^{13}\text{C}$ NMR.....                   | S25 |
| Compound <b>7b</b> - $^1\text{H}$ NMR.....                      | S26 |
| Compound <b>7b</b> - $^{13}\text{C}$ NMR.....                   | S27 |
| Compound <b>6b</b> - $^1\text{H}$ NMR.....                      | S28 |
| Compound <b>6b</b> - $^{13}\text{C}$ NMR.....                   | S29 |
| Compound <b>6b</b> – 1D NOESY.....                              | S30 |
| Compound C-7- <i>epi</i> - <b>6b</b> - $^1\text{H}$ NMR.....    | S31 |
| Compound C-7- <i>epi</i> - <b>6b</b> - $^{13}\text{C}$ NMR..... | S32 |
| Compound C-7- <i>epi</i> - <b>6b</b> – 1D NOESY.....            | S33 |
| Compound <b>S7</b> - $^1\text{H}$ NMR (crude).....              | S34 |
| Compound <b>14</b> - $^1\text{H}$ NMR (crude).....              | S35 |
| Compound <b>16</b> - $^1\text{H}$ NMR.....                      | S36 |
| Compound <b>16</b> - $^{13}\text{C}$ NMR.....                   | S37 |
| Compound <b>S8</b> - $^1\text{H}$ NMR.....                      | S38 |
| Compound <b>S8</b> - $^{13}\text{C}$ NMR.....                   | S39 |
| Compound <b>17</b> - $^1\text{H}$ NMR.....                      | S40 |
| Compound <b>17</b> - $^{13}\text{C}$ NMR.....                   | S41 |
| Compound <b>5</b> - $^1\text{H}$ NMR.....                       | S42 |
| Compound <b>5</b> - $^{13}\text{C}$ NMR.....                    | S43 |
| Compound <b>5</b> – 1D NOESY.....                               | S44 |
| Bisabosqual A ( <b>1</b> ) - $^1\text{H}$ NMR.....              | S45 |
| Bisabosqual A ( <b>1</b> ) - $^{13}\text{C}$ NMR.....           | S46 |

## **General Methods**

Unless otherwise stated, all air and moisture-sensitive reactions were performed in oven-dried glassware under nitrogen. Unless otherwise stated, all commercially available chemicals, reagents and solvents were used as received. Reactions were monitored by thin layer chromatography (TLC) performed on Analtech, Inc. silica gel GF 250  $\mu\text{m}$  plates and were visualized with ultraviolet (UV) light (254 nm) and/or  $\text{KMnO}_4$  staining or by UPLC-MS (Waters Acquity, ESI (ESI +/-, APCI +/-)). Gas chromatography – mass spectrometry (GC-MS) was performed with an Agilent 5890 GC Oven and an Agilent 5973 Mass Selective Detector. Silica gel flash chromatography was performed with RediSep<sup>®</sup>Rf normal phase silica flash columns on a CombiFlash Rf system from Teledyne Isco, Inc.  $^1\text{H}$  and  $^{13}\text{C}$  nuclear magnetic resonance (NMR) spectra were recorded on a Varian-Inova 400 (400 MHz and 101 MHz, respectively), a Bruker 400 (400 MHz and 101 MHz, respectively), or a Bruker 500 (500 MHz and 126 MHz, respectively) spectrometer. Chemical shifts are reported in ppm relative to  $\text{CHCl}_3$  ( $^1\text{H}$ ,  $\delta = 7.26$  and  $^{13}\text{C}$  NMR  $\delta = 77.0$ ). The peak shapes are denoted as follows: s, singlet; d, doublet; t, triplet; q, quartet; spt, septet; m, multiplet; br s, broad singlet. Infrared (IR) spectra were recorded with a Thermo-Nicolet Avatar 360 FT-IR. High-resolution mass spectra (HRMS) were acquired on an Agilent model 6220 MS(TOF).

### Scheme S1

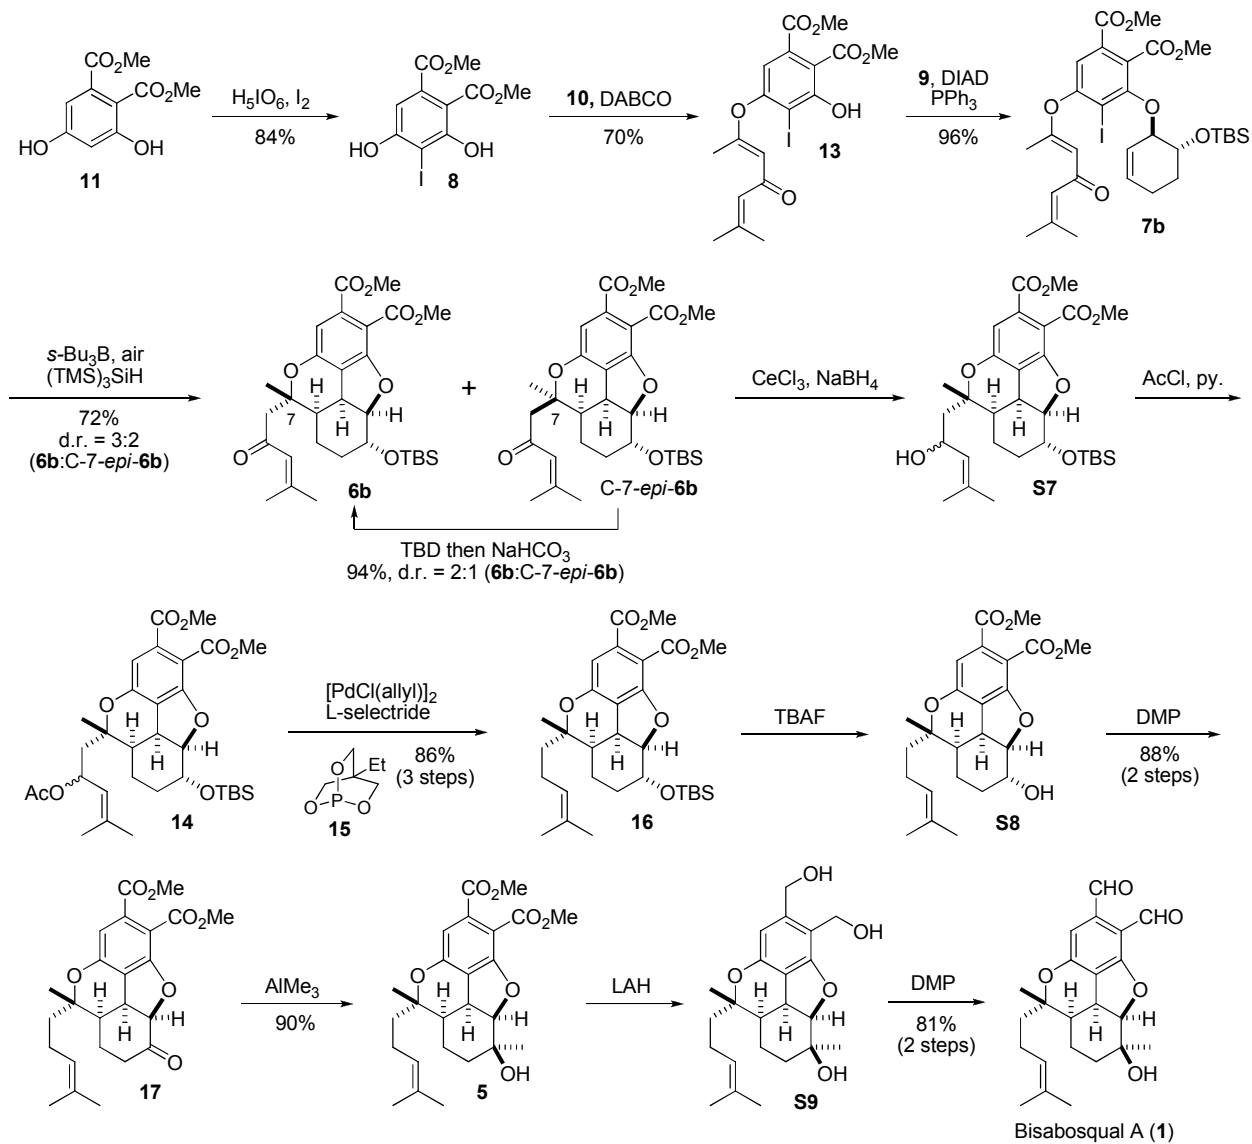

### Scheme S2

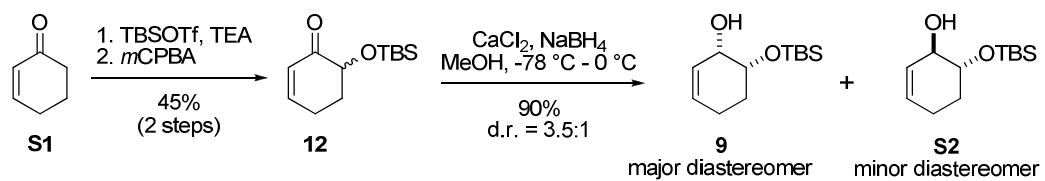

### Scheme S3

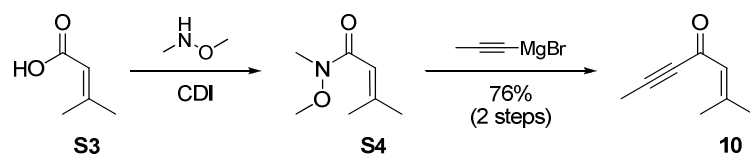

### Scheme S4

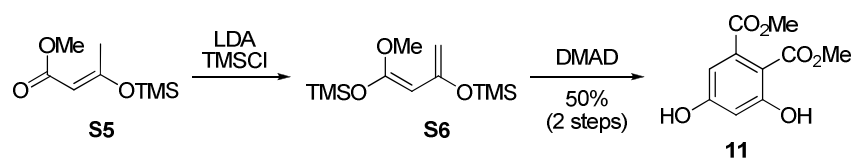

## Experimental Procedures and Characterization

### Compound 9

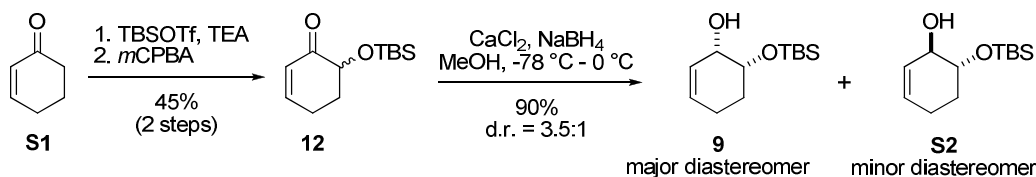

To a stirred solution of **12** (6.00 g, 26.5 mmol) in MeOH (150 mL) was added  $\text{CaCl}_2$  (4.40 g, 39.8 mmol, 1.5 equiv.). The mixture was cooled to  $-78\text{ }^\circ\text{C}$  and  $\text{NaBH}_4$  (1.20 g, 31.8 mmol, 1.2 equiv.) was added in portions over a period of 20 minutes. The mixture was stirred at  $-78\text{ }^\circ\text{C}$  for 6 hours and then the mixture was allowed to slowly warm to  $0\text{ }^\circ\text{C}$  and stirred for 1 hour. Saturated aqueous  $\text{NaHCO}_3$  was added and the resulting mixture was extracted with  $\text{CH}_2\text{Cl}_2$  (4x). The combined organic solution was dried with anhydrous  $\text{MgSO}_4$  and concentrated under reduced pressure. The  $^1\text{H}$  NMR spectrum of the crude product indicated a 3.5:1 mixture of diastereomers favoring **9**. The mixture was purified via silica gel flash chromatography (EtOAc/Heptane) to afford **9** (4.11 g, 68% yield) as a colorless oil and **S2** (1.34 g, 22% yield) as a colorless oil.

**9**:  $^1\text{H}$  NMR (400MHz,  $\text{CDCl}_3$ )  $\delta$  5.88 - 5.81 (m, 1H), 5.75 - 5.69 (m, 1H), 4.05 - 3.97 (m, 1H), 3.89 - 3.82 (m, 1H), 2.54 (br s, 1H), 2.25 - 2.13 (m, 1H), 2.06 - 1.94 (m, 1H), 1.89 - 1.77 (m, 1H), 1.64 - 1.53 (m, 1H), 0.91 (s, 9H), 0.11 (s, 6H).  $^{13}\text{C}$  NMR (101MHz,  $\text{CDCl}_3$ ):  $\delta$  130.8, 127.0, 70.3, 66.5, 26.1, 25.8, 23.8, 18.1, -4.5, -4.9 ppm. FTIR ( $\text{cm}^{-1}$ ) = 3559, 3029, 2952, 2929, 2886, 2857, 1463, 1252, 1094. HRMS (ESI) calculated for  $\text{C}_{12}\text{H}_{24}\text{O}_2\text{SiNa}$   $[\text{M}+\text{Na}]^+$  251.1438, found 251.1444.

**S2**:  $^1\text{H}$  NMR (400MHz,  $\text{CDCl}_3$ )  $\delta$  5.74 - 5.66 (m, 1H), 5.62 - 5.56 (m, 1H), 4.07 - 3.99 (m, 1H), 3.64 (ddd,  $J=3.5, 7.0, 10.8$  Hz, 1H), 2.17 - 2.08 (m, 2H), 2.06 (d,  $J=3.7$  Hz, 1H), 1.86 - 1.77 (m, 1H), 1.69 - 1.57 (m, 1H), 0.90 (s, 9H), 0.11 (s, 3H), 0.10 (s, 3H).  $^{13}\text{C}$  NMR (101MHz,  $\text{CDCl}_3$ )  $\delta$  128.8, 127.8, 74.2, 73.1, 29.1, 25.8, 24.6, 18.1, -4.3, -4.6 ppm. FTIR ( $\text{cm}^{-1}$ ) = 3364, 3028, 2929, 2890, 2856, 1463. HRMS (ESI) calculated for  $\text{C}_{12}\text{H}_{24}\text{O}_2\text{SiNa}$   $[\text{M}+\text{Na}]^+$  251.1438, found 251.1443.

**12**<sup>1</sup>:  $^1\text{H}$  NMR (400MHz,  $\text{CDCl}_3$ )  $\delta$  6.91 - 6.85 (m, 1H), 6.01 - 5.94 (m, 1H), 4.16 (dd,  $J=4.9, 11.3$  Hz, 1H), 2.57 - 2.35 (m, 2H), 2.20 - 2.11 (m, 1H), 2.11 - 1.97 (m, 1H), 0.90 (s, 9H), 0.15 (s, 3H), 0.08 (s, 3H).  $^{13}\text{C}$  NMR (101MHz,  $\text{CDCl}_3$ )  $\delta$  198.6, 149.4, 128.4, 74.1, 32.4, 25.7, 25.2, 18.4, -4.5, -5.4 ppm.

<sup>1</sup> Synthesis of compound **12** was previously described. Draghici, C.; Brewer, M. J. *Am. Chem. Soc.* **2008**, *130*, 3766.

Compound **10**<sup>2</sup>

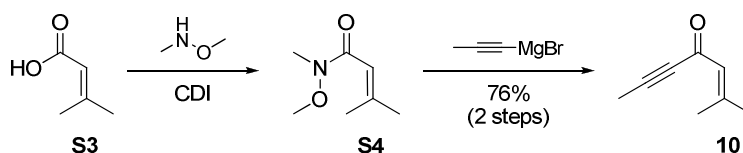

**10:** <sup>1</sup>H NMR (500MHz, CDCl<sub>3</sub>) δ 6.13 (spt, *J*=1.3 Hz, 1H), 2.20 (d, *J*=1.5 Hz, 3H), 2.01 (s, 3H), 1.92 (d, *J*=1.2 Hz, 3H). <sup>13</sup>C NMR (101MHz, CDCl<sub>3</sub>) δ 176.8, 157.5, 126.0, 88.3, 82.5, 27.8, 21.0, 4.1 ppm. FTIR (cm<sup>-1</sup>) = 2978, 2213, 1650, 1607, 1440, 1378. HRMS (ESI) calculated for C<sub>8</sub>H<sub>11</sub>O [M+H]<sup>+</sup> 123.0804, found 123.0807

**S4:** <sup>1</sup>H NMR (400MHz, CDCl<sub>3</sub>) δ 6.02 (br. s., 1H), 3.58 (s, 3H), 3.10 (s, 3H), 2.04 (d, *J*=1.4 Hz, 2H), 1.81 (d, *J*=1.4 Hz, 2H), <sup>13</sup>C NMR (101MHz, CDCl<sub>3</sub>) δ 167.8, 152.8, 114.1, 61.1, 35.9, 27.3, 19.9 ppm. FTIR (cm<sup>-1</sup>) = 2972, 2937, 1652, 1445, 1366. HRMS (ESI) calculated for C<sub>7</sub>H<sub>14</sub>NO<sub>2</sub> [M+H]<sup>+</sup> 144.1019, found 144.1023.

Compound **11**<sup>3</sup>

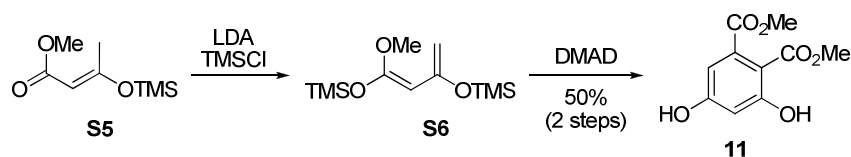

**11:** <sup>1</sup>H NMR (500MHz, CDCl<sub>3</sub>) δ 10.97 (s, 1H), 7.25 (s, 1H), 6.46 (d, *J*=2.4 Hz, 1H), 6.41 (d, *J*=2.4 Hz, 1H), 3.89 (s, 3H), 3.87 ppm (s, 3H). <sup>13</sup>C NMR (101MHz, CDCl<sub>3</sub>) δ 170.3, 169.0, 163.6, 161.4, 137.1, 108.1, 104.9, 102.7, 53.0, 52.7 ppm. FTIR (cm<sup>-1</sup>) = 3349, 2955, 1709, 1668, 1618, 1590, 1463. HRMS (ESI) calculated for C<sub>10</sub>H<sub>11</sub>O<sub>6</sub> [M+H]<sup>+</sup> 227.0550, found 227.0555.

**S6:** <sup>1</sup>H NMR (400MHz, CDCl<sub>3</sub>) δ 4.47 (s, 1H), 4.14 (d, *J*=1.4 Hz, 1H), 3.94 (d, *J*=1.4 Hz, 1H), 3.55 (s, 3H), 0.24 (s, 9H), 0.21 (s, 9H). <sup>13</sup>C NMR (101MHz, CDCl<sub>3</sub>) δ 158.7, 153.5, 89.4, 77.8, 55.1, 0.6, 0.4 ppm

<sup>2</sup> Synthesis of compound **10** was previously described. Jacobi, P. A.; Armacost, L. M.; Brielmann, H. L.; Cann, R. O.; Kravitz, J. I.; Martinelli, M. J. *J Org. Chem.* **1994**, *59*, 5292.

<sup>3</sup> Synthesis of compound **11** was previously described. Yamamoto, K.; Suzuki, S.; Tsuji, J. *Chemistry Letters.* **1978**, 649.

### Compound **8**

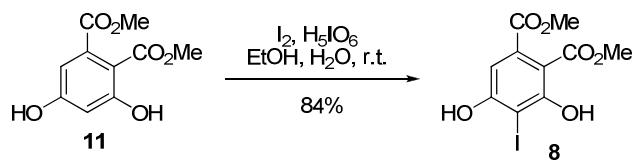

To a stirred solution of **11** (5.2 g, 0.023 mol) in EtOH (150 mL) was added I<sub>2</sub> (3.5 g, 0.0138 mol, 0.6 equiv.) in one portion followed by H<sub>5</sub>IO<sub>6</sub> (1.05 g, 4.6 mmol, 0.2 equiv.) as a solution in water (4 mL). The reaction mixture was stirred at room temperature for 6 hours and then it was concentrated under reduced pressure. EtOAc was added and the resulting mixture was washed with 10% aqueous Na<sub>2</sub>S<sub>2</sub>O<sub>3</sub> and brine. The organic layer was dried with anhydrous MgSO<sub>4</sub> and concentrated under reduced pressure. The crude product was purified by silica gel chromatography (EtOAc/Heptane) to afford **8** (6.8 g, 84% yield) as a white solid.

**8**: <sup>1</sup>H NMR (400MHz, CDCl<sub>3</sub>) δ 12.00 (s, 1H), 6.63 (s, 1H), 6.19 (s, 1H), 3.91 (s, 3H), 3.88 ppm (s, 3H). <sup>13</sup>C NMR (126 MHz, CDCl<sub>3</sub>) δ 168.8, 168.8, 162.1, 160.4, 137.3, 106.7, 102.7, 78.3, 53.1, 52.9. FTIR (cm<sup>-1</sup>) = 3219, 1691, 1665, 1595, 1438, 1409, 1331, 1251 cm<sup>-1</sup>. HRMS (ESI) calculated for C<sub>10</sub>H<sub>10</sub>I<sub>2</sub>O<sub>6</sub> [M+H]<sup>+</sup> 352.9515, found 352.9517.

### Compound **13**

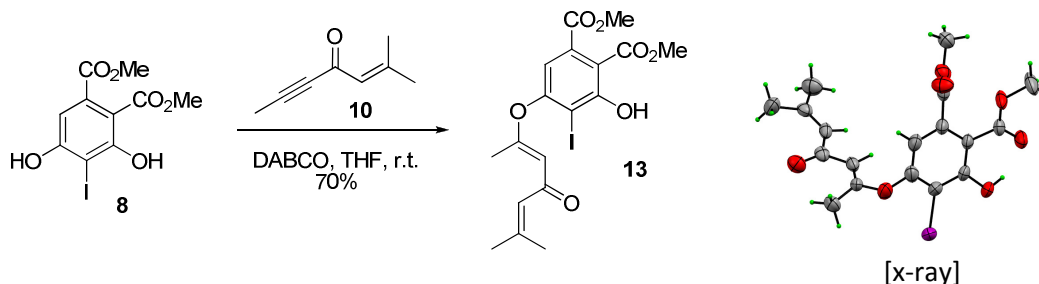

To a stirred solution of **8** (8.00 g, 22.7 mmol) and **10** (4.2 g, 34 mmol, 1.5 equiv.) in THF (150 mL) was added DABCO (0.51g, 4.5 mmol, 0.2 equiv.) in one portion at room temperature. The mixture was stirred at room temperature for 80 hours and then CH<sub>2</sub>Cl<sub>2</sub> was added followed by water. The aqueous layer was carefully adjusted to pH 3 with a 1N aqueous solution of KHSO<sub>4</sub> and extracted with CH<sub>2</sub>Cl<sub>2</sub> (2x). The organic layer was dried over anhydrous MgSO<sub>4</sub> and then concentrated under reduced pressure. The crude product was purified by silica gel chromatography (EtOAc/Heptane) to afford **13** (7.52 g, 70% yield, 84% yield based on recovered starting material) of a white solid.

**13**: <sup>1</sup>H NMR (400 MHz, CDCl<sub>3</sub>) δ ppm 11.70 (s, 1 H), 6.70 (s, 1 H), 5.83-5.80 (m, 1 H), 5.30 (s, 1 H), 3.95 (s, 3 H), 3.89 (s, 3 H), 2.52 (s, 3 H), 2.14 (d, J=1.2 Hz, 3 H), 1.83 (d, J=1.2 Hz, 3 H). <sup>13</sup>C NMR (101MHz, CDCl<sub>3</sub>) δ 189.5, 168.6, 168.5, 167.9, 162.4, 158.8, 154.9, 136.9, 126.3, 112.8, 108.4, 107.1, 84.5, 53.4, 52.9, 27.7, 20.6, 18.4 ppm. FTIR (cm<sup>-1</sup>) = 2953, 1737, 1675, 1621, 1584, 1438, 1390, 1323, 1252, 1191, 1161, 1100, 1056. HRMS (ESI) calculated for C<sub>18</sub>H<sub>20</sub>I<sub>2</sub>O<sub>7</sub> [M+H]<sup>+</sup> 475.0248, found 475.0238.



## Compound **7b**

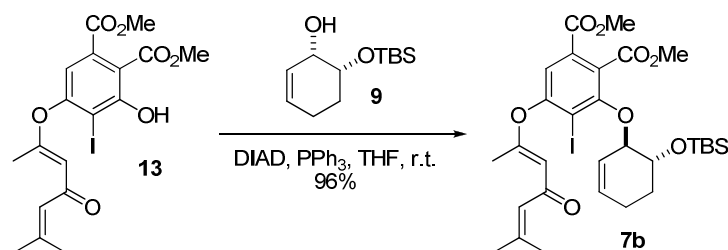

To a stirred solution of **13** (1.66 g, 3.50 mmol), **9** (0.96 g, 4.2 mmol, 1.2 equiv.) and  $\text{PPh}_3$  (1.38 g, 5.25 mmol, 1.5 equiv.) in THF (35 mL) at room temperature was added DIAD (1.06 g, 5.25 mmol, 1.5 equiv.) dropwise over a period of 10 minutes. After stirring an additional 6h, the reaction mixture was quenched by the addition of water and the resulting mixture was extracted with EtOAc. The combined organic solution was dried with anhydrous  $\text{MgSO}_4$  and then concentrated under reduced pressure. The crude residue was purified by silica gel flash chromatography (EtOAc/Heptane) to afford **7b** (2.30 g, 96% yield) as a colorless gum.

**7b**:  $^1\text{H}$  NMR (400MHz,  $\text{CDCl}_3$ )  $\delta$  7.41 (s, 1H), 5.98 (dt,  $J=3.5, 10.0$  Hz, 1H), 5.84 - 5.78 (m, 1H), 5.64 - 5.55 (m, 1H), 5.15 (s, 1H), 4.72 - 4.65 (m, 1H), 4.23 (dt,  $J=2.9, 6.2$  Hz, 1H), 3.92 (s, 3H), 3.88 (s, 3H), 2.55 (s, 3H), 2.30 - 2.16 (m, 1H), 2.13 (d,  $J=0.8$  Hz, 3H), 2.11 - 2.02 (m, 1H), 2.01 - 1.92 (m, 1H), 1.82 (d,  $J=1.0$  Hz, 3H), 1.77 - 1.67 (m, 1H), 0.84 (s, 9H), 0.03 (s, 3H), 0.00 (s, 3H).  $^{13}\text{C}$  NMR (101MHz,  $\text{CDCl}_3$ )  $\delta$  189.6, 169.6, 166.2, 164.6, 157.0, 155.3, 154.6, 133.8, 130.3, 127.7, 126.4, 122.2, 118.7, 107.0, 96.7, 81.4, 68.7, 52.9, 52.9, 27.6, 26.6, 25.7, 21.7, 20.6, 18.5, 18.1, -4.7, -4.8 ppm. FTIR ( $\text{cm}^{-1}$ ) = 2951, 2855, 1732, 1620, 1572, 1382, 1278, 1250, 1096. HRMS (ESI) calculated for  $\text{C}_{30}\text{H}_{41}\text{O}_8\text{SiNa}$   $[\text{M}+\text{Na}]^+$  707.1507, found 707.1492.

## Compound **6b**

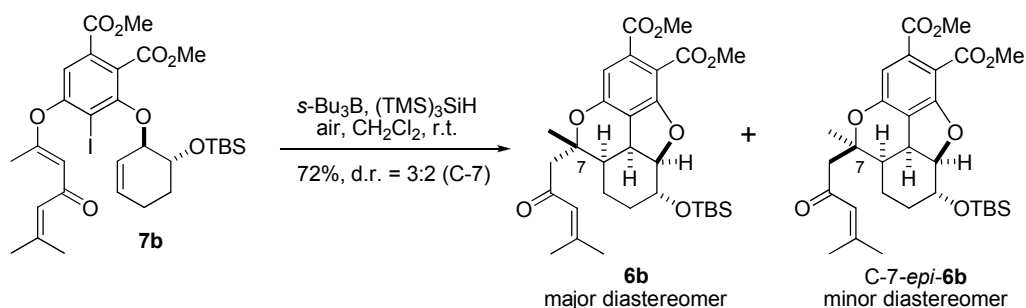

To a stirred solution of **7b** (2.30 g, 3.36 mmol) and  $(\text{TMS})_3\text{SiH}$  (1.25g, 3.36 mmol, 1.5 equiv.) in  $\text{CH}_2\text{Cl}_2$  at room temperature was simultaneously added  $s\text{-Bu}_3\text{B}$  (3.36 mL, 1M in THF, 3.36 mmol, 1 equiv.) and air via a syringe (10 mL). The addition procedure took place over a period of 30 min. The mixture was stirred an additional 15 minutes at room temperature and then the mixture was concentrated under reduced pressure. The crude  $^1\text{H}$  NMR spectrum indicated a 3:2 mixture of diastereomers about C-7, favoring **6b**. The crude residue was subjected to silica gel flash chromatography (EtOAc/Heptane) to afford 1.36 g (72% yield) of a 3:2 (**6b**:C-7-*epi*-**6b**) mixture of diastereomers as a pale yellow foam. Separation of diastereomers was performed by preparative HPLC (5-100% EtOH in Heptane,

Phenomenex Cellulose-2, 250 x 21.2mm 5 $\mu$ , Flow = 28 mL/min) to afford **6b** (0.79 g, 42%) as a white solid and C-7-*epi-6b* (0.41 g, 22%) as a pale yellow solid.

**6b**:  $^1\text{H}$  NMR (400MHz,  $\text{CDCl}_3$ )  $\delta$  6.69 (s, 1H), 6.01 (s, 1H), 4.90-4.84 (m, 1H), 3.87 (s, 3H), 3.85 (s, 3H), 3.61 (t,  $J=7.3$  Hz, 1H), 3.25-3.17 (m, 1H), 2.77-2.62 (m, 2H), 2.47-2.39 (m, 1H), 2.15 (s, 3H), 1.88 (s, 3H), 1.80-1.71 (m, 1H), 1.70-1.62 (m, 1H), 1.52 (s, 3H), 1.32-1.19 (m, 1H), 0.85 (s, 9H), 0.92-0.79 (m, 1H), 0.04 (s, 3H), -0.07 ppm (s, 3H).  $^{13}\text{C}$  NMR (100MHz,  $\text{CDCl}_3$ )  $\delta$  197.3, 168.4, 165.4, 159.6, 157.5, 153.0, 135.3, 124.5, 114.5, 109.7, 108.0, 95.9, 81.5, 72.5, 52.7, 52.2, 51.5, 35.6, 35.3, 30.8, 27.9, 25.7, 23.5, 20.9, 20.1, 17.9, -4.9, -5.2 ppm. FTIR ( $\text{cm}^{-1}$ ) = 2950, 1727, 1683, 1622, 1432, 1377. HRMS (ESI) calculated for  $\text{C}_{30}\text{H}_{43}\text{O}_8\text{Si}$   $[\text{M}+\text{H}]^+$  559.2722, found 559.2718.

C-7-*epi-6b*:  $^1\text{H}$  NMR (500MHz,  $\text{CDCl}_3$ )  $\delta$  6.66 (s, 1H), 6.15 - 6.13 (m, 1H), 4.86 (dd,  $J=6.7, 8.2$  Hz, 1H), 3.86 (s, 3H), 3.84 (s, 3H), 3.63 (t,  $J=7.3$  Hz, 1H), 3.20 (ddd,  $J=4.4, 6.8, 11.7$  Hz, 1H), 2.98 - 2.81 (m, 2H), 2.52 - 2.43 (m, 1H), 2.15 (d,  $J=1.2$  Hz, 3H), 1.91 (d,  $J=1.2$  Hz, 3H), 1.65 - 1.54 (m, 2H), 1.41 (s, 3H), 1.30 - 1.17 (m, 1H), 0.84 (s, 9H), 0.87 - 0.75 (m, 1H), 0.03 (s, 3H), -0.08 (s, 3H).  $^{13}\text{C}$  NMR (126 MHz,  $\text{CDCl}_3$ )  $\delta$  197.0, 168.5, 165.5, 159.5, 156.9, 152.7, 135.3, 124.3, 114.7, 109.9, 107.7, 95.8, 81.8, 72.5, 52.7, 52.1, 51.5, 35.6, 34.6, 30.8, 27.9, 25.7, 24.3, 20.9, 20.7, 17.9, -4.9, -5.2. FTIR ( $\text{cm}^{-1}$ ) = 2950, 1725, 1686, 1620, 1433, 1377. HRMS (ESI) calculated for  $\text{C}_{30}\text{H}_{43}\text{O}_8\text{Si}$   $[\text{M}+\text{H}]^+$  559.2722, found 559.2720.

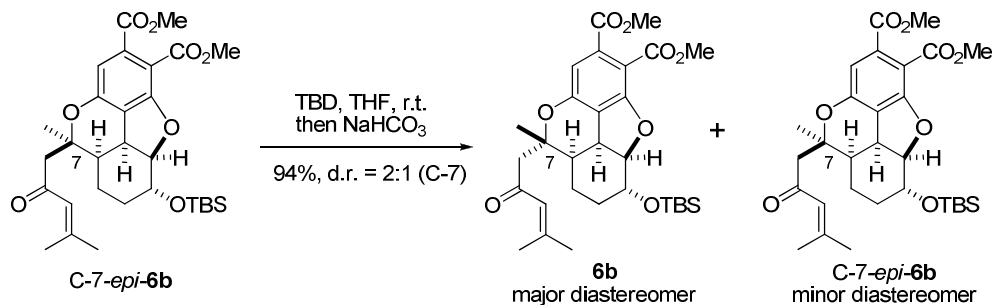

To a stirred solution of C-7-*epi-6b* (50 mg, 0.089 mmol) in THF (1 mL) at room temperature was added 1,5,7-triazabicyclo[4.4.0]dec-5-ene (TBD) (18.7 mg, 0.13 mmol, 1.5 equiv.) in one portion. The resulting mixture was stirred at room temperature for 20 minutes and then saturated aqueous  $\text{NaHCO}_3$  (1 mL) was added followed by  $\text{CH}_2\text{Cl}_2$  (1 mL). The mixture was allowed to stir at room temperature for 2 hours and then it was extracted with  $\text{CH}_2\text{Cl}_2$  (3x). The combined organic solution was dried with anhydrous  $\text{MgSO}_4$  and concentrated under reduced pressure. The  $^1\text{H}$  NMR of the crude product indicated a 2:1 mixture of diastereomers about C-7, favoring **6b**. The crude residue was purified via flash chromatography (EtOAc/Heptane) to afford a mixture of **6b** and C-7-*epi-6b* (47 mg, 94% yield as a 2:1 (**6b**:C-7-*epi-6b*) mixture of diastereomers) as a colorless gum.

## Compound 16

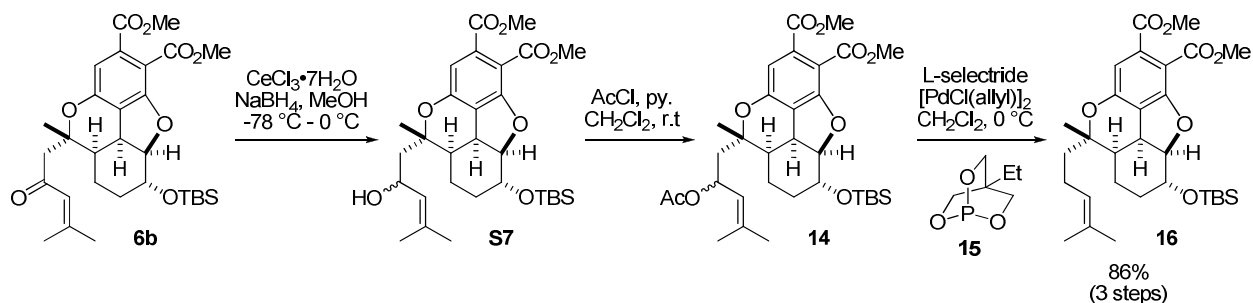

To a stirred solution of **6b** (250 mg, 0.45 mmol) and cerium chloride heptahydrate (333 mg, 0.89 mmol, 2 equiv.) in MeOH (10 mL) at -78 °C was added NaBH<sub>4</sub> (25 mg, 0.67 mmol, 1.5 equiv.) in one portion. The mixture was allowed to warm to 0 °C. After stirring for 1h, the mixture was quenched with saturated aqueous NH<sub>4</sub>Cl and extracted with CH<sub>2</sub>Cl<sub>2</sub> (3x). The combined organic solution was dried with anhydrous MgSO<sub>4</sub> and concentrated under reduced pressure to provide 250 mg of a white foam as a mixture of diastereomers at C-9 (~5:1). The residue was used directly in the next step. To a stirred solution of **7** in CH<sub>2</sub>Cl<sub>2</sub> (8 mL) at 0 °C was added pyridine (72 μL, 0.89 mmol, 2 equiv.) followed by acetyl chloride (38 μL, 0.54 mmol, 1.2 equiv.) dropwise over a period of 5 minutes. The mixture was stirred at 0 °C for 30 minutes after which TLC indicated the consumption of starting material. The reaction mixture was quenched with saturated aqueous NH<sub>4</sub>Cl (5 mL) and extracted with CH<sub>2</sub>Cl<sub>2</sub> (3x). The combined organic solution was washed with 0.1 N aqueous KHSO<sub>4</sub>, dried over anhydrous MgSO<sub>4</sub>, and concentrated under reduced pressure to provide 268 mg (99% crude yield) of a white solid as a mixture of diastereomers at C-9. A portion of the crude residue was used directly in the next step: to a stirred solution of **14** (180 mg, 0.30 mmol) in THF (15mL) at room temperature was added allylpalladium (II) chloride dimer (5.5 mg, 0.015 mmol, 0.05 equiv.) and phosphite **15** (9.7 mg, 0.06 mmol, 0.2 equiv.). The solution was cooled to 0 °C and L-selectride (0.6 mL, 1.0 M in THF, 0.6 mmol, 2 equiv.) was added in one portion and stirred at 0 °C until TLC indicated consumption of starting material (15 min). The reaction mixture was quenched with saturated aqueous NH<sub>4</sub>Cl (5 mL) and the resulting mixture was diluted with water and then extracted with CH<sub>2</sub>Cl<sub>2</sub> (3x). The combined organic solution was dried over anhydrous MgSO<sub>4</sub> and concentrated under reduced pressure. The crude residue was subjected to silica gel flash chromatography (EtOAc/Heptane) to afford **16** (140 mg, 86% yield for 3 steps) as a colorless gum.

**16**: <sup>1</sup>H NMR (400MHz, CDCl<sub>3</sub>) δ 6.66 (s, 1H), 5.05 - 4.96 (m, 1H), 4.85 (dd, *J*=6.8, 7.8 Hz, 1H), 3.85 (s, 3H), 3.83 (s, 3H), 3.61 (t, *J*=7.3 Hz, 1H), 3.26 - 3.16 (m, 1H), 2.10 - 1.93 (m, 3H), 1.77 - 1.66 (m, 1H), 1.63 (s, 3H), 1.65 - 1.57 (m, 1H), 1.55 (s, 3H), 1.53 - 1.44 (m, 1H), 1.39 (s, 3H), 1.29 - 1.18 (m, 2H), 0.84 (s, 9H), 0.88 - 0.81 (m, 1H), 0.04 (s, 3H), -0.06 - -0.09 (m, 3H). <sup>13</sup>C NMR (101MHz, CDCl<sub>3</sub>): δ 168.5, 165.5, 159.4, 153.5, 135.2, 132.3, 123.1, 114.3, 109.8, 107.4, 95.6, 82.6, 72.5, 52.6, 52.1, 38.4, 36.5, 35.1, 30.9, 25.7, 25.6, 22.3, 22.2, 20.4, 17.9, 17.6, -4.9, -5.3 ppm. FTIR (cm<sup>-1</sup>) = 2951, 1723, 1624, 1432, 1377. HRMS (ESI) calculated for C<sub>30</sub>H<sub>45</sub>O<sub>7</sub>Si [M+H]<sup>+</sup> 545.2929, found 545.2940.

**7**: (crude NMR, data extracted from major diastereomer): <sup>1</sup>H NMR (400MHz, CDCl<sub>3</sub>) δ 6.71 (s, 1H), 5.17-5.10 (m, 1H), 4.87 (dd, *J*=8.2, 6.7 Hz, 1H), 4.75-4.67 (m, 1H), 3.86 (s, 3H), 3.84 (s, 3H), 3.67-3.61 (m, 1H), 3.23 (ddd, *J*=11.8, 6.7, 4.7 Hz, 1H), 2.08-1.99 (m, 1H), 1.98-1.90 (m, 2H), 1.80-1.72 (m, 1H), 1.69 (s, 3H), 1.69 (s, 3H), 1.60 (s, 1H), 1.53 (s, 3H), 1.55-1.49 (m, 1H), 1.31-1.17 (m, 1H) 0.94-0.80 ppm (m, 1H), 0.85

(s, 9H), 0.84-0.86 (m, 1H), 0.04 (s, 3H), -0.06 ppm (s, 3H). HRMS (ESI) calculated for  $C_{30}H_{45}O_8Si$   $[M+H]^+$  561.2878, found 561.2876.

**14:** (crude NMR, data extracted from major diastereomer):  $^1H$  NMR (400MHz,  $CDCl_3$ )  $\delta$  6.65 (s, 1H), 5.77 (dt,  $J=3.5, 8.9$  Hz, 1H), 5.10 - 5.03 (m, 1H), 4.87 (dd,  $J=6.6, 8.3$  Hz, 1H), 3.86 (s, 3H), 3.85 (s, 3H), 3.64 - 3.57 (m, 1H), 3.22 (ddd,  $J=4.6, 6.7, 11.8$  Hz, 1H), 2.13 - 2.05 (m, 1H), 2.04 - 1.96 (m, 1H), 1.96 (s, 3H), 1.76 (d,  $J=1.2$  Hz, 3H), 1.69 (d,  $J=1.2$  Hz, 3H), 1.68 - 1.63 (m, 2H), 1.44 (s, 3H), 1.47 - 1.40 (m, 1H), 1.32 - 1.18 (m, 1H), 0.86 (s, 9H), 0.91 - 0.79 (m, 1H), 0.04 (s, 3H), -0.06 (s, 3H). HRMS (ESI) calculated for  $C_{32}H_{46}O_9Si$   $[M+Na]^+$  625.2803, found 625.2797.

### Compound 17

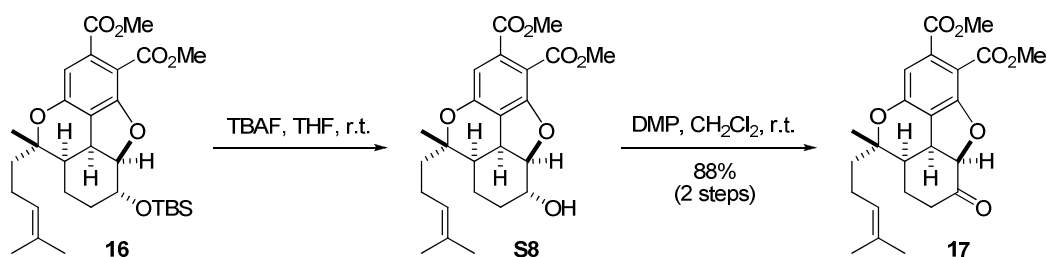

To a stirred solution of **16** (80 mg, 0.15 mmol) in THF (3 mL) at 0 °C was added TBAF (0.49 mL, 1.0 M in THF, 0.49 mmol, 1.5 equiv.) dropwise over a period of 5 minutes. The reaction mixture was warmed to room temperature and stirred until TLC indicated consumption of starting material (1 h). The reaction mixture was diluted with CH<sub>2</sub>Cl<sub>2</sub> and the resulting solution was washed with water (3x) and brine (2x) and then dried over anhydrous MgSO<sub>4</sub> and concentrated under reduced pressure to yield **8** as white solid (62mg). The crude residue was used directly in the next step. To a stirred solution of **8** (62 mg, 0.14 mmol) in CH<sub>2</sub>Cl<sub>2</sub> (3 mL) at room temperature was added Dess-Martin periodinane (91 mg, 0.21 mmol, 1.5 equiv.) in one portion. The reaction mixture was stirred at room temperature until TLC indicated consumption of starting material (20 min). A 1:1 mixture of saturated aqueous NaHCO<sub>3</sub> and 10% aqueous Na<sub>2</sub>S<sub>2</sub>O<sub>3</sub> (3 mL) was added and the resulting mixture was stirred at room temperature for 15 minutes and then extracted with CH<sub>2</sub>Cl<sub>2</sub>, (3x). The combined organic solution was washed with a 1:1 mixture of saturated aqueous NaHCO<sub>3</sub> and 10% aqueous Na<sub>2</sub>S<sub>2</sub>O<sub>3</sub>, dried over anhydrous MgSO<sub>4</sub>, and concentrated under reduced pressure. The residue was subjected to silica gel flash chromatography (EtOAc/Heptane) to afford **17** (54 mg, 88% yield over 2 steps) as a white solid.

**8:**  $^1H$  NMR (400MHz,  $CDCl_3$ )  $\delta$  6.69 (s, 1H), 5.04 - 4.98 (m, 1H), 4.90 (dd,  $J=7.0, 8.2$  Hz, 1H), 3.87 (s, 3H), 3.86 (s, 3H), 3.65 (t,  $J=7.2$  Hz, 1H), 3.33 (ddd,  $J=4.3, 7.1, 12.0$  Hz, 1H), 2.12 - 2.00 (m, 3H), 1.86 - 1.75 (m, 2H), 1.65 (s, 3H), 1.68 - 1.59 (m, 1H), 1.57 (s, 3H), 1.55 - 1.47 (m, 1H), 1.41 (s, 3H), 1.32 - 1.18 (m, 1H), 0.98 (s, 1H), 0.95 - 0.84 (m, 1H).  $^{13}C$  NMR (100 MHz,  $CDCl_3$ )  $\delta$  168.2, 165.7, 159.3, 153.5, 134.9, 132.4, 123.1, 114.3, 110.0, 107.6, 95.4, 82.7, 71.7, 52.6, 52.4, 38.5, 36.4, 35.0, 29.1, 25.6, 22.3, 22.2, 20.6, 17.6. FTIR ( $cm^{-1}$ ) = 3394, 2952, 1715, 1623, 1433, 1377. HRMS (ESI) calculated for  $C_{24}H_{31}O_7$   $[M+H]^+$  431.2070, found 431.2073.

**17:**  $^1\text{H}$  NMR (400MHz,  $\text{CDCl}_3$ )  $\delta$  6.68 (s, 1H), 5.22 (d,  $J=8.6$  Hz, 1H), 5.03 (t,  $J=7.0$  Hz, 1H), 4.08 (t,  $J=6.8$  Hz, 1H), 3.89 (s, 3H), 3.84 (s, 3H), 2.47 - 2.25 (m, 3H), 2.16 - 2.02 (m, 3H), 1.65 (s, 3H), 1.73 - 1.62 (m, 1H), 1.59 (s, 3H), 1.44 (s, 3H), 1.30 - 1.16 (m, 2H).  $^{13}\text{C}$  NMR (101MHz,  $\text{CDCl}_3$ ):  $\delta$  205.4, 168.0, 165.0, 159.9, 153.4, 135.6, 132.6, 122.8, 111.1, 110.1, 107.4, 88.3, 82.4, 52.6, 52.5, 38.5, 38.5, 38.5, 36.3, 25.6, 22.6, 22.5, 22.2, 17.6 ppm. FTIR ( $\text{cm}^{-1}$ ) = 2951, 1722, 1621, 1432, 1375. HRMS calculated for  $\text{C}_{24}\text{H}_{29}\text{O}_7$   $[\text{M}+\text{H}]^+$  429.1908, found 429.1914.

### Compound 5

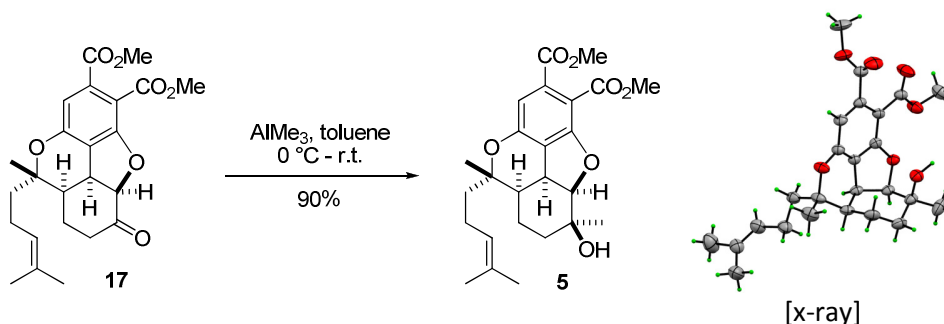

To a stirred solution of **17** (52 mg, 0.12 mmol) in toluene (3 mL) at 0 °C was added  $\text{AlMe}_3$  (0.09 mL, 2.0 M in heptane, 0.18 mmol, 1.5 equiv.) dropwise over a period of 5 minutes. The reaction mixture was allowed to warm to room temperature and then stir until TLC indicated consumption of starting material (30 min). The reaction mixture was quenched with saturated aqueous  $\text{NaHCO}_3$  and the resulting mixture was extracted with  $\text{CH}_2\text{Cl}_2$  (4x). The combined organic solution was filtered through Celite and concentrated under reduced pressure. The residue was subjected to silica gel flash chromatography (EtOAc/Heptane) to afford **5** (49 mg, 90% yield) as a white solid.

**5:**  $^1\text{H}$  NMR (400 MHz,  $\text{CDCl}_3$ )  $\delta$  6.73 (s, 1H), 4.99-5.06 (m, 1H), 4.86 (d,  $J=8.98$  Hz, 1H), 3.89 (s, 3H), 3.85 (s, 3H), 3.62-3.69 (m, 1H), 2.02-2.11 (m, 2H), 1.93-2.01 (m, 1H), 1.73-1.81 (m, 1H), 1.65 (s, 3H), 1.61-1.71 (m, 1H), 1.58 (s, 3H), 1.56 (br. s., 1H), 1.47-1.55 (m, 2H), 1.42 (s, 3H), 1.27 (s, 3H), 1.25-1.33 (m, 1H), 1.12-1.24 (m, 1H).  $^{13}\text{C}$  NMR (101MHz,  $\text{CDCl}_3$ )  $\delta$  168.0, 166.1, 161.0, 153.3, 133.6, 132.3, 123.3, 114.7, 110.3, 106.1, 92.0, 82.5, 69.1, 52.5, 52.3, 38.5, 36.2, 34.8, 33.7, 29.8, 25.6, 22.2, 22.2, 17.6, 16.3 ppm. FTIR ( $\text{cm}^{-1}$ ) = 2956, 1627, 1433, 1376, 1289, 1263. HRMS (ESI) calculated for  $\text{C}_{25}\text{H}_{33}\text{O}_7$   $[\text{M}+\text{H}]^+$  445.2221, found 445.2224.

Compound 1: Bisabosqual A

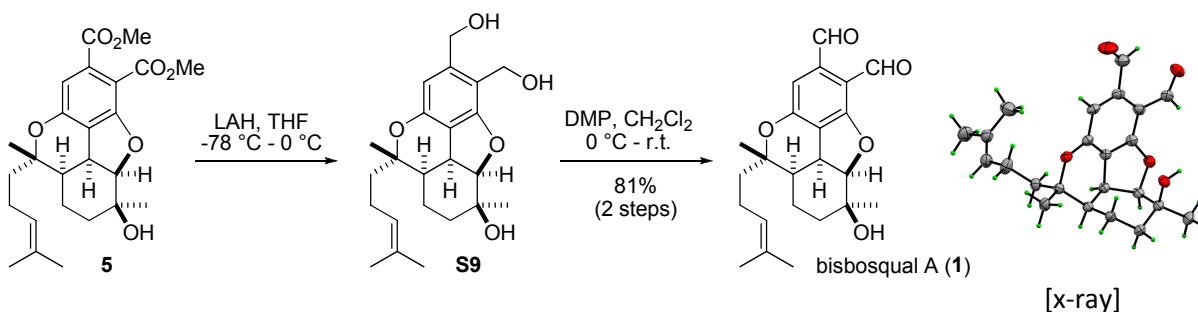

To a stirred solution of **5** (25.1 mg, 0.0565 mmol) in THF (3 mL) at  $-78\text{ }^{\circ}\text{C}$  was added LAH (0.14 mL, 1.0 M in THF, 0.14 mmol, 2.5 equiv.) dropwise over a period of 10 minutes. The reaction mixture was allowed to warm to  $0\text{ }^{\circ}\text{C}$  and stirred at this temperature until TLC analysis indicated the reaction to be complete (30 min). The reaction mixture was carefully quenched with  $\text{Na}_2\text{SO}_4 \cdot 10\text{H}_2\text{O}$  and the resulting mixture was filtered through Celite and then concentrated under reduced pressure. The crude residue was used immediately in the subsequent step without purification. To a stirred solution of crude **S9** (from above) in  $\text{CH}_2\text{Cl}_2$  (3 mL) at  $0\text{ }^{\circ}\text{C}$  was added Dess-Martin periodinane (59 mg, 0.14 mmol, 2.5 equiv.) in one portion. The reaction mixture was warmed to room temperature and then stirred until TLC indicated consumption of starting material (45 min). Then a 1:1 mixture of saturated aqueous  $\text{NaHCO}_3$  and 10% aqueous  $\text{Na}_2\text{S}_2\text{O}_3$  (3 mL) was added and the resulting mixture was stirred at room temperature for 30 minutes. The reaction mixture was extracted with  $\text{CH}_2\text{Cl}_2$ , (3x). The combined organic solution was washed with a 1:1 mixture of saturated aqueous  $\text{NaHCO}_3$  and 10% aqueous  $\text{Na}_2\text{S}_2\text{O}_3$ , dried over anhydrous  $\text{Na}_2\text{SO}_4$  and concentrated under reduced pressure. The residue was subjected to silica gel flash chromatography (EtOAc/Heptane) to afford **1** (17.5 mg, 81% yield over 2 steps) as a white solid.

**1**:  $^1\text{H}$  NMR (400MHz,  $\text{CDCl}_3$ )  $\delta$  10.47 (s, 1H), 10.37 (s, 1H), 6.93 (s, 1H), 5.03 (tdt,  $J=1.4, 2.9, 7.1$  Hz, 1H), 4.97 (d,  $J=8.8$  Hz, 1H), 3.69 - 3.63 (m, 1H), 2.13 - 2.05 (m, 2H), 2.09 - 2.00 (m, 1H), 1.83 - 1.76 (m, 1H), 1.72 - 1.64 (m, 1H), 1.65 (s, 3H), 1.59 (s, 3H), 1.59 - 1.56 (m, 1H), 1.57 (br. s, 1H), 1.56 - 1.53 (m, 1H), 1.46 (s, 3H), 1.32 (s, 3H), 1.32 - 1.26 (m, 1H), 1.25 - 1.17 (m, 1H).  $^{13}\text{C}$  NMR (101MHz,  $\text{CDCl}_3$ ):  $\delta$  192.2, 188.1, 165.5, 155.7, 139.3, 132.5, 123.1, 117.3, 113.8, 112.4, 92.7, 83.5, 69.2, 38.7, 36.0, 34.9, 33.3, 29.6, 25.6, 22.2, 22.1, 17.7, 16.4. FTIR ( $\text{cm}^{-1}$ ) = 3469, 2967, 1685, 1618, 1382. HRMS (ESI) calculated for  $\text{C}_{23}\text{H}_{29}\text{O}_5$   $[\text{M}+\text{H}]^+$  385.2010, found 385.2007.

**Comparison of Natural and Synthetic Bisabosqual A:**

| Position | Authentic ( <sup>1</sup> H)          | Synthetic ( <sup>1</sup> H)           | Authentic ( <sup>13</sup> C) | Synthetic ( <sup>13</sup> C) |
|----------|--------------------------------------|---------------------------------------|------------------------------|------------------------------|
| 1        | 1.55 (m, 1H), 1.28 (m, 1H)           | 1.55 (m, 1H), 1.29 (m, 1H)            | 16.33                        | 16.4                         |
| 2        | 1.79 (m, 1H), 1.21 (m, 1H)           | 1.80 (m, 1H), 1.21 (m, 1H)            | 34.93                        | 34.9                         |
| 3        | -                                    | -                                     | 69.14                        | 69.2                         |
| 4        | 4.97 (d, <i>J</i> =8.8 Hz, 1H)       | 4.97 (d, <i>J</i> =8.8 Hz, 1H)        | 92.77                        | 92.7                         |
| 5        | 3.66 (dd, <i>J</i> =8.8, 6.6 Hz, 1H) | 3.66 (m, 1H)                          | 33.27                        | 33.3                         |
| 6        | 2.05 (m, 1H)                         | 2.05 (m, 1H)                          | 35.94                        | 36.0                         |
| 7        | -                                    | -                                     | 83.52                        | 83.5                         |
| 8        | 1.67 (m, 1H), 1.57 (m, 1H)           | 1.68 (m, 1H), 1.58 (m, 1H)            | 38.71                        | 38.7                         |
| 9        | 2.08 (m, 2H)                         | 2.09 (m, 2H)                          | 22.21                        | 22.2                         |
| 10       | 5.03 (m, 1H)                         | 5.03 (tdt, <i>J</i> =7.1,2.9,1.4, 1H) | 123.08                       | 123.1                        |
| 11       | -                                    | -                                     | 132.47                       | 132.5                        |
| 12       | 1.65 (br. s, 3H)                     | 1.65 (s, 3H)                          | 25.57                        | 25.6                         |
| 13       | 1.59 (br. s, 3H)                     | 1.59 (s, 3H)                          | 17.63                        | 17.7                         |
| 14       | 1.46 (s, 3H)                         | 1.46 (s, 3H)                          | 22.11                        | 22.1                         |
| 15       | 1.31 (s, 3H)                         | 1.32 (s, 3H)                          | 29.53                        | 29.6                         |
| 1'       | -                                    | -                                     | 117.31                       | 117.3                        |
| 2'       | -                                    | -                                     | 165.69                       | 165.5                        |
| 3'       | -                                    | -                                     | 112.08                       | 112.4                        |
| 4'       | -                                    | -                                     | 139.26                       | 139.3                        |
| 5'       | 6.93 (s, 1H)                         | 6.93 (s, 1H)                          | 113.67                       | 113.8                        |
| 6'       | -                                    | -                                     | 155.71                       | 155.7                        |
| 7'       | 10.46 (s, 1H)                        | 10.47 (s, 1H)                         | 188.27                       | 188.1                        |
| 8'       | 10.36 (s, 1H)                        | 10.37 (s, 1H)                         | 192.24                       | 192.2                        |
| 3-OH     | 1.55 (br. s, 1H)                     | 1.57 (br. s, 1H)                      | -                            | -                            |

|                               |                      |                              |                      |                               |             |
|-------------------------------|----------------------|------------------------------|----------------------|-------------------------------|-------------|
| <b>Acquisition Time (sec)</b> | 2.5625               | <b>Comment</b>               |                      |                               |             |
| <b>Date</b>                   | 05 Aug 2012 14:20:48 | <b>Date Stamp</b>            | 05 Aug 2012 14:20:48 |                               |             |
| <b>File Name</b>              |                      |                              |                      |                               |             |
| <b>Frequency (MHz)</b>        | 399.54               | <b>Nucleus</b>               | 1H                   | <b>Number of Transients</b>   | 16          |
| <b>Origin</b>                 | spect                | <b>Original Points Count</b> | 16384                | <b>Owner</b>                  | FCNGRO-BRKO |
| <b>Points Count</b>           | 16384                | <b>Pulse Sequence</b>        | zg30                 | <b>Receiver Gain</b>          | 57.00       |
| <b>SW(cyclical) (Hz)</b>      | 6393.86              | <b>Solvent</b>               | CHLOROFORM-d         | <b>Spectrum Offset (Hz)</b>   | 2384.9451   |
| <b>Spectrum Type</b>          | STANDARD             | <b>Sweep Width (Hz)</b>      | 6393.47              | <b>Temperature (degree C)</b> | 25.148      |

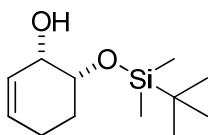

**9**

<sup>1</sup>HNMR (400 MHz) in CDCl<sub>3</sub>

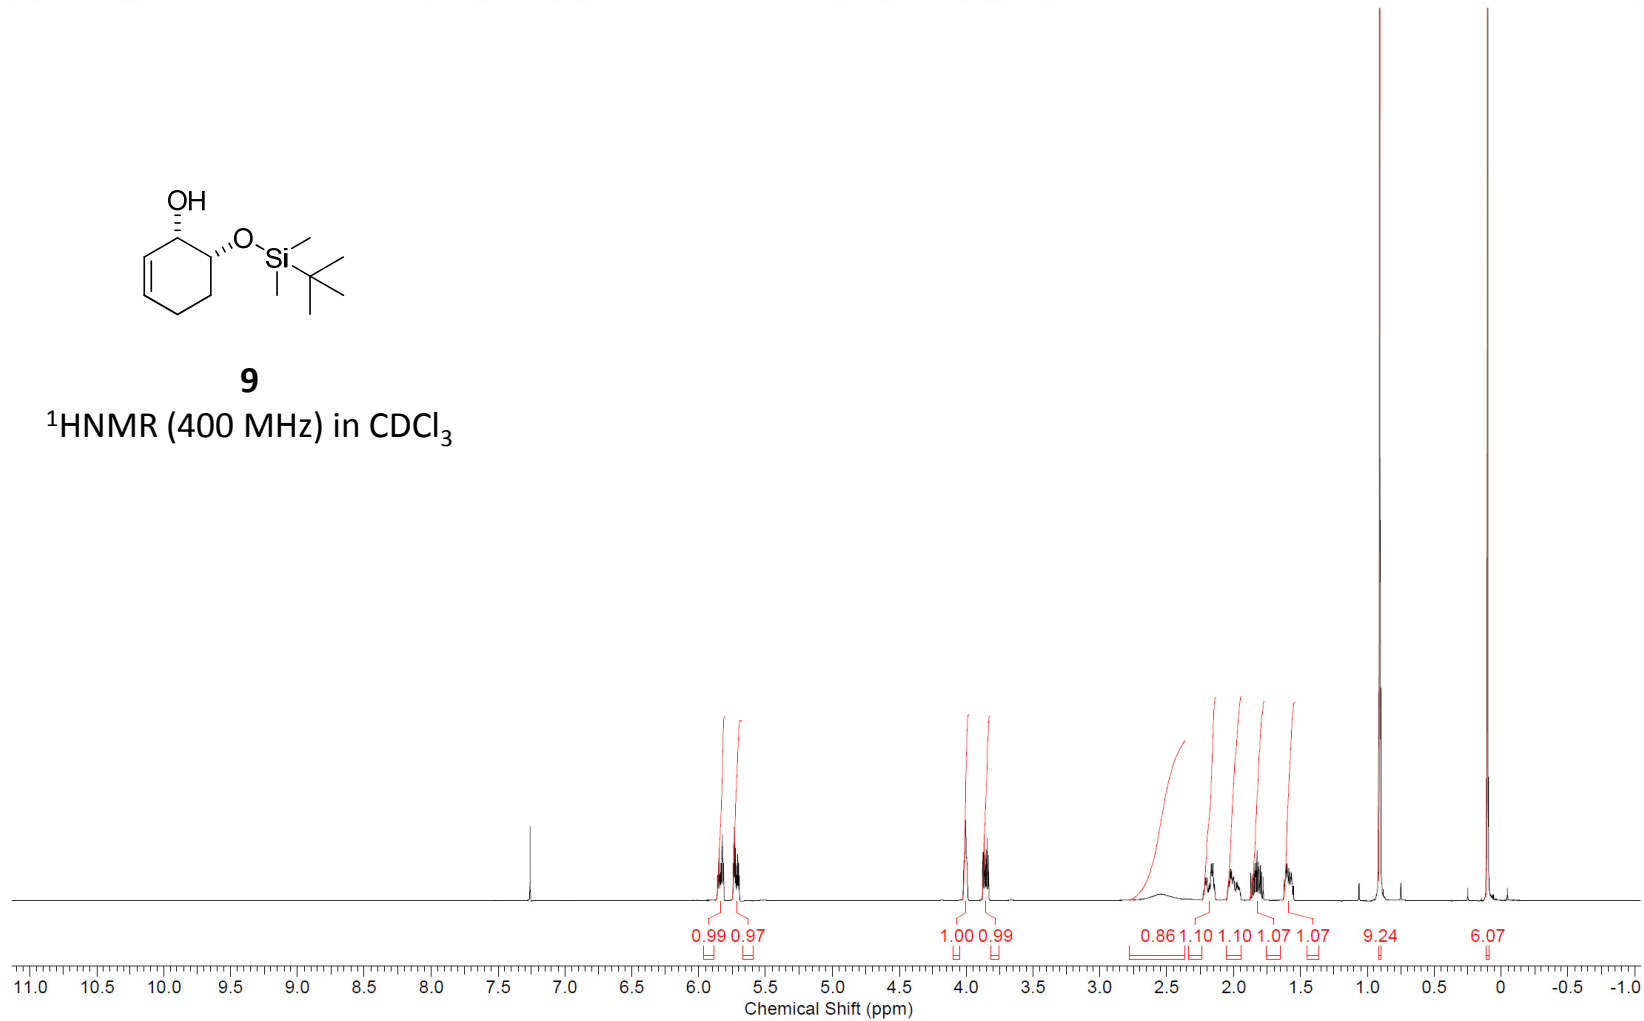



|                               |        |                             |                |                              |              |                               |             |
|-------------------------------|--------|-----------------------------|----------------|------------------------------|--------------|-------------------------------|-------------|
| <b>Acquisition Time (sec)</b> | 1.4680 | <b>Comment</b>              | 00701217-D-161 | <b>Date</b>                  | Jun 17 2012  | <b>Date Stamp</b>             | Jun 17 2012 |
| <b>File Name</b>              |        | <b>Number of Transients</b> | 512            | <b>Original Points Count</b> | 32768        | <b>Frequency (MHz)</b>        | 100.64      |
| <b>Nucleus</b>                | 13C    | <b>Receiver Gain</b>        | 40.00          | <b>Solvent</b>               | CHLOROFORM-d | <b>Points Count</b>           | 32768       |
| <b>Pulse Sequence</b>         | s2pul  | <b>Spectrum Type</b>        | STANDARD       | <b>Sweep Width (Hz)</b>      | 22321.43     | <b>Temperature (degree C)</b> | 25.000      |

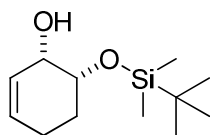

**9**

<sup>13</sup>CNMR (100 MHz) in CDCl<sub>3</sub>

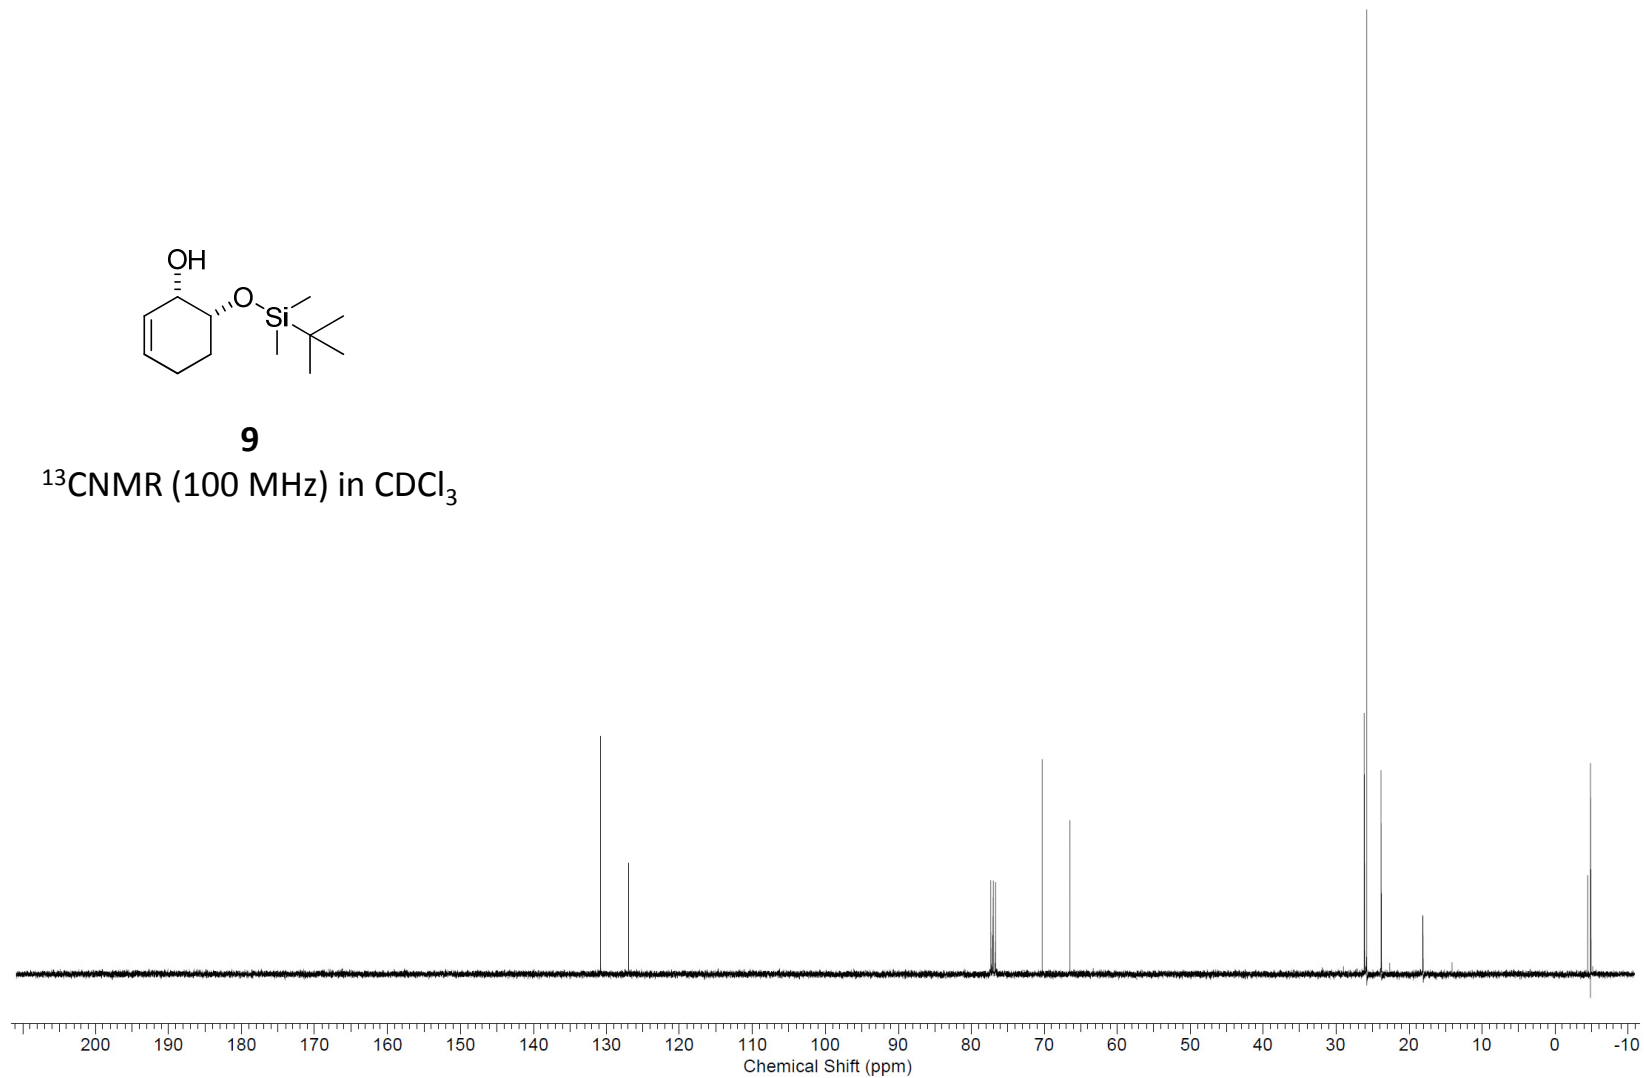

|                        |             |                      |                                               |                       |                 |                        |        |
|------------------------|-------------|----------------------|-----------------------------------------------|-----------------------|-----------------|------------------------|--------|
| Acquisition Time (sec) | 2.9464      | Comment              | 00701217-E293-P                               |                       | Date            | Jun 17 2012            |        |
| Date Stamp             | Jun 17 2012 | File Name            | \\UNITY1.PFIZER.COM\SAMBA\120617\0201.FID\FID |                       | Frequency (MHz) | 499.58                 |        |
| Nucleus                | 1H          | Number of Transients | 16                                            | Original Points Count | 23552           | Points Count           | 32768  |
| Pulse Sequence         | s2pul       | Receiver Gain        | 44.00                                         | Solvent               | CHLOROFORM-d    |                        |        |
| Spectrum Offset (Hz)   | 2992.8242   | Spectrum Type        | STANDARD                                      | Sweep Width (Hz)      | 7993.60         | Temperature (degree C) | 25.000 |

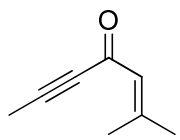

**10**

<sup>1</sup>HNMR (500 MHz) in CDCl<sub>3</sub>

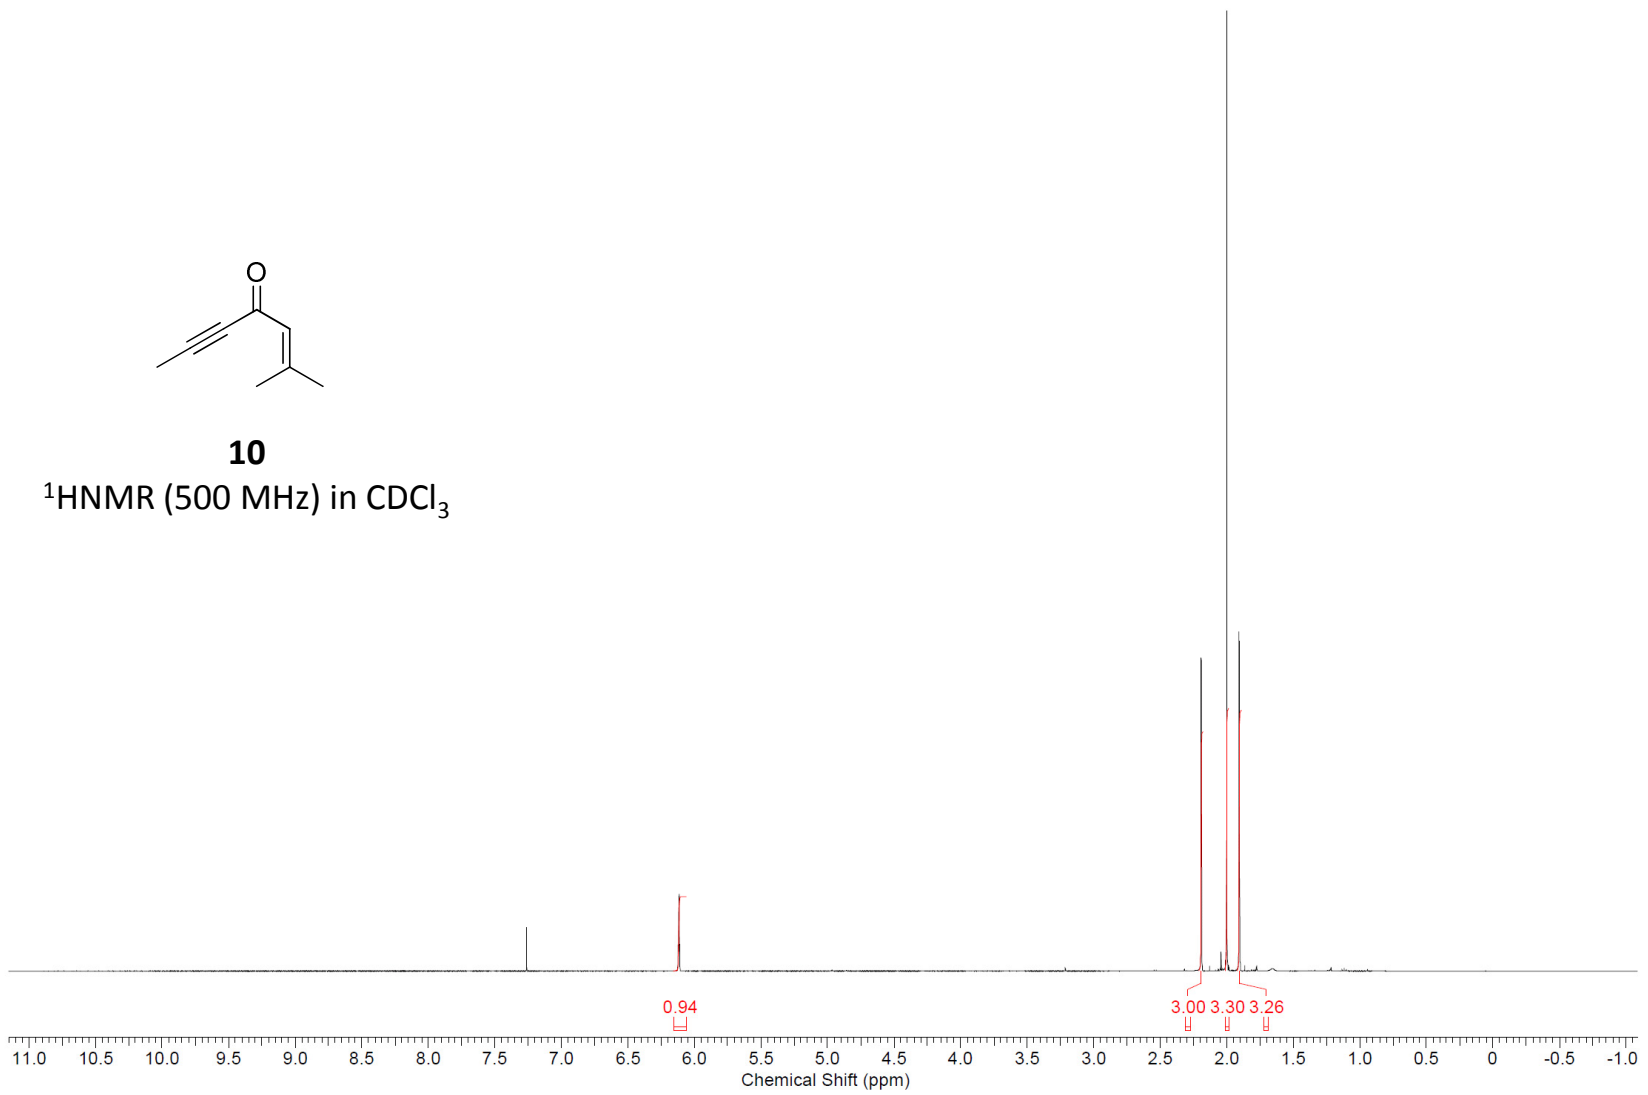

|                               |                                                                                     |                             |                |                               |              |                   |             |
|-------------------------------|-------------------------------------------------------------------------------------|-----------------------------|----------------|-------------------------------|--------------|-------------------|-------------|
| <b>Acquisition Time (sec)</b> | 1.4680                                                                              | <b>Comment</b>              | 00701217-E-293 | <b>Date</b>                   | Jun 17 2012  | <b>Date Stamp</b> | Jun 17 2012 |
| <b>File Name</b>              | \\UNITYH.PFIZER.COM\AUTO\2012\20120617\00701217-E-293_20120617_03\CARBON_01.FID\FID |                             |                | <b>Frequency (MHz)</b>        | 100.64       |                   |             |
| <b>Nucleus</b>                | 13C                                                                                 | <b>Number of Transients</b> | 512            | <b>Original Points Count</b>  | 32768        |                   |             |
| <b>Pulse Sequence</b>         | s2pul                                                                               | <b>Receiver Gain</b>        | 40.00          | <b>Solvent</b>                | CHLOROFORM-d |                   |             |
| <b>Spectrum Offset (Hz)</b>   | 10061.6934                                                                          | <b>Spectrum Type</b>        | STANDARD       | <b>Sweep Width (Hz)</b>       | 22321.43     |                   |             |
|                               |                                                                                     |                             |                | <b>Temperature (degree C)</b> | 25.000       |                   |             |

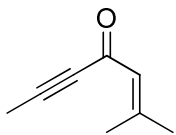

**10**

<sup>13</sup>CNMR (100 MHz) in CDCl<sub>3</sub>

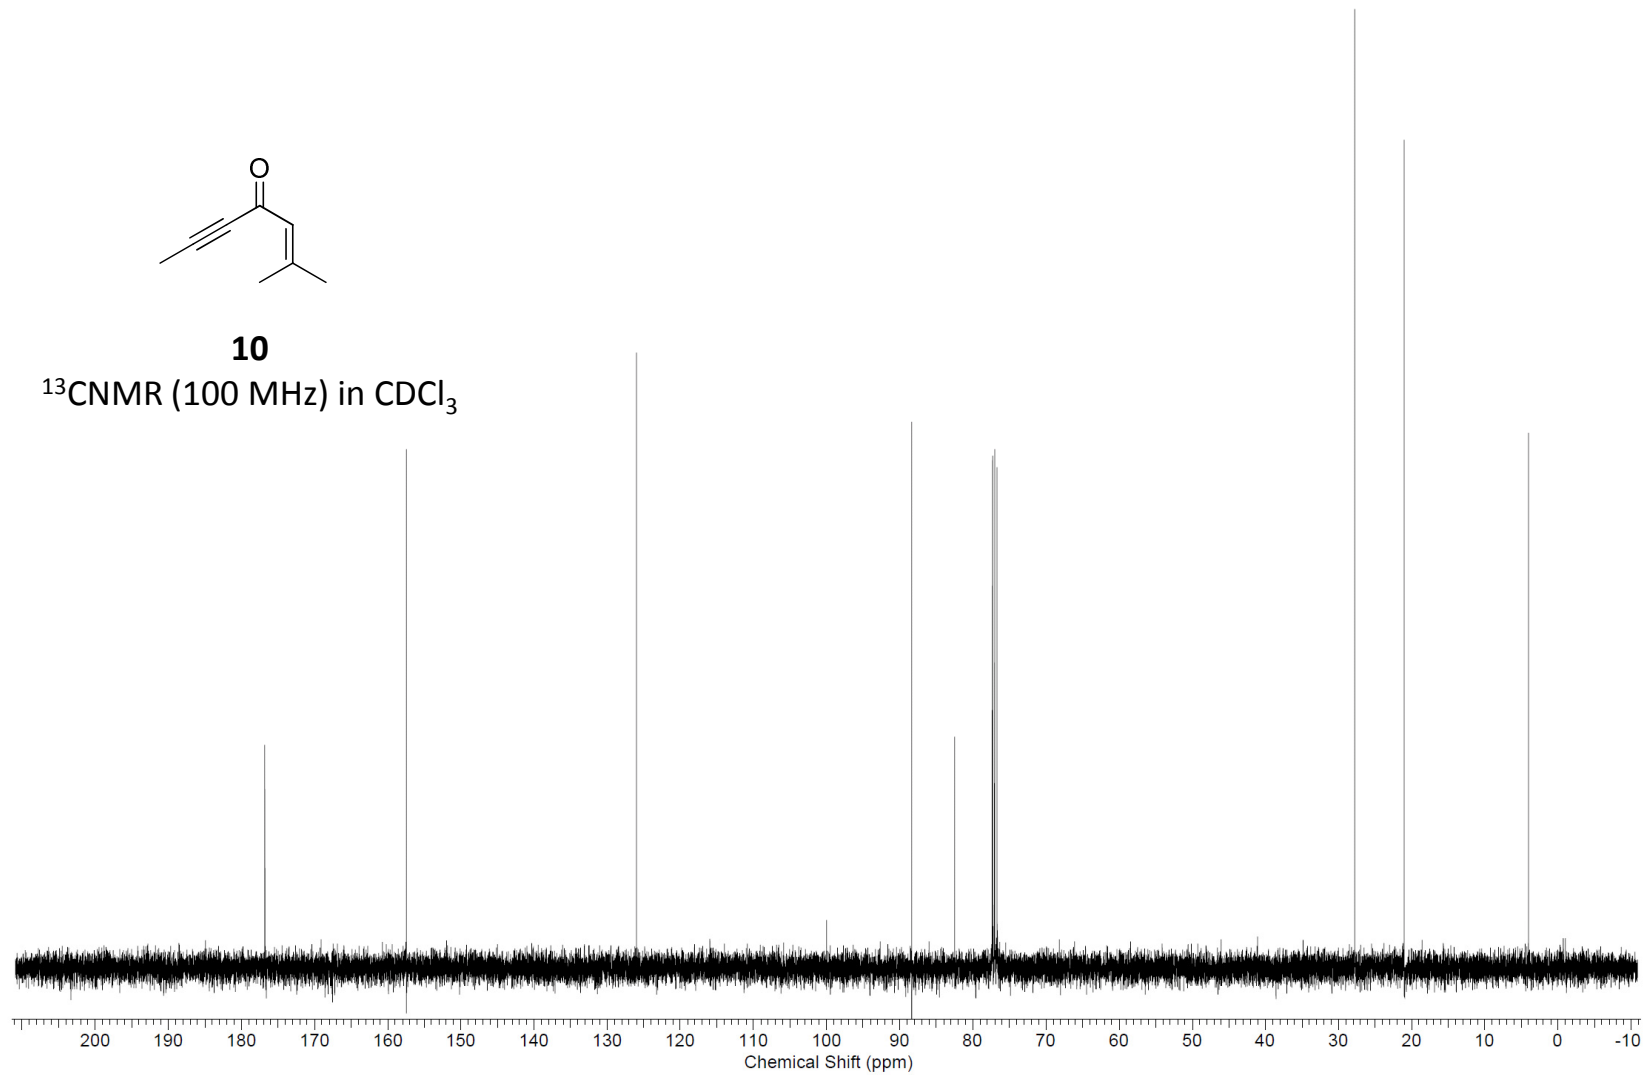

|                        |             |                      |                                               |                       |                 |                        |        |
|------------------------|-------------|----------------------|-----------------------------------------------|-----------------------|-----------------|------------------------|--------|
| Acquisition Time (sec) | 2.9464      | Comment              | 00701217-E215-P                               |                       | Date            | Jun 17 2012            |        |
| Date Stamp             | Jun 17 2012 | File Name            | \\UNITY1.PFIZER.COM\SAMBA\120617\0101.FID\FID |                       | Frequency (MHz) | 499.58                 |        |
| Nucleus                | 1H          | Number of Transients | 16                                            | Original Points Count | 23552           | Points Count           | 32768  |
| Pulse Sequence         | s2pul       | Receiver Gain        | 42.00                                         | Solvent               | CHLOROFORM-d    |                        |        |
| Spectrum Offset (Hz)   | 2993.0684   | Spectrum Type        | STANDARD                                      | Sweep Width (Hz)      | 7993.60         | Temperature (degree C) | 25.000 |

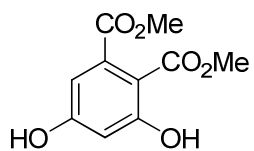

**11**

<sup>1</sup>HNMR (500 MHz) in CDCl<sub>3</sub>

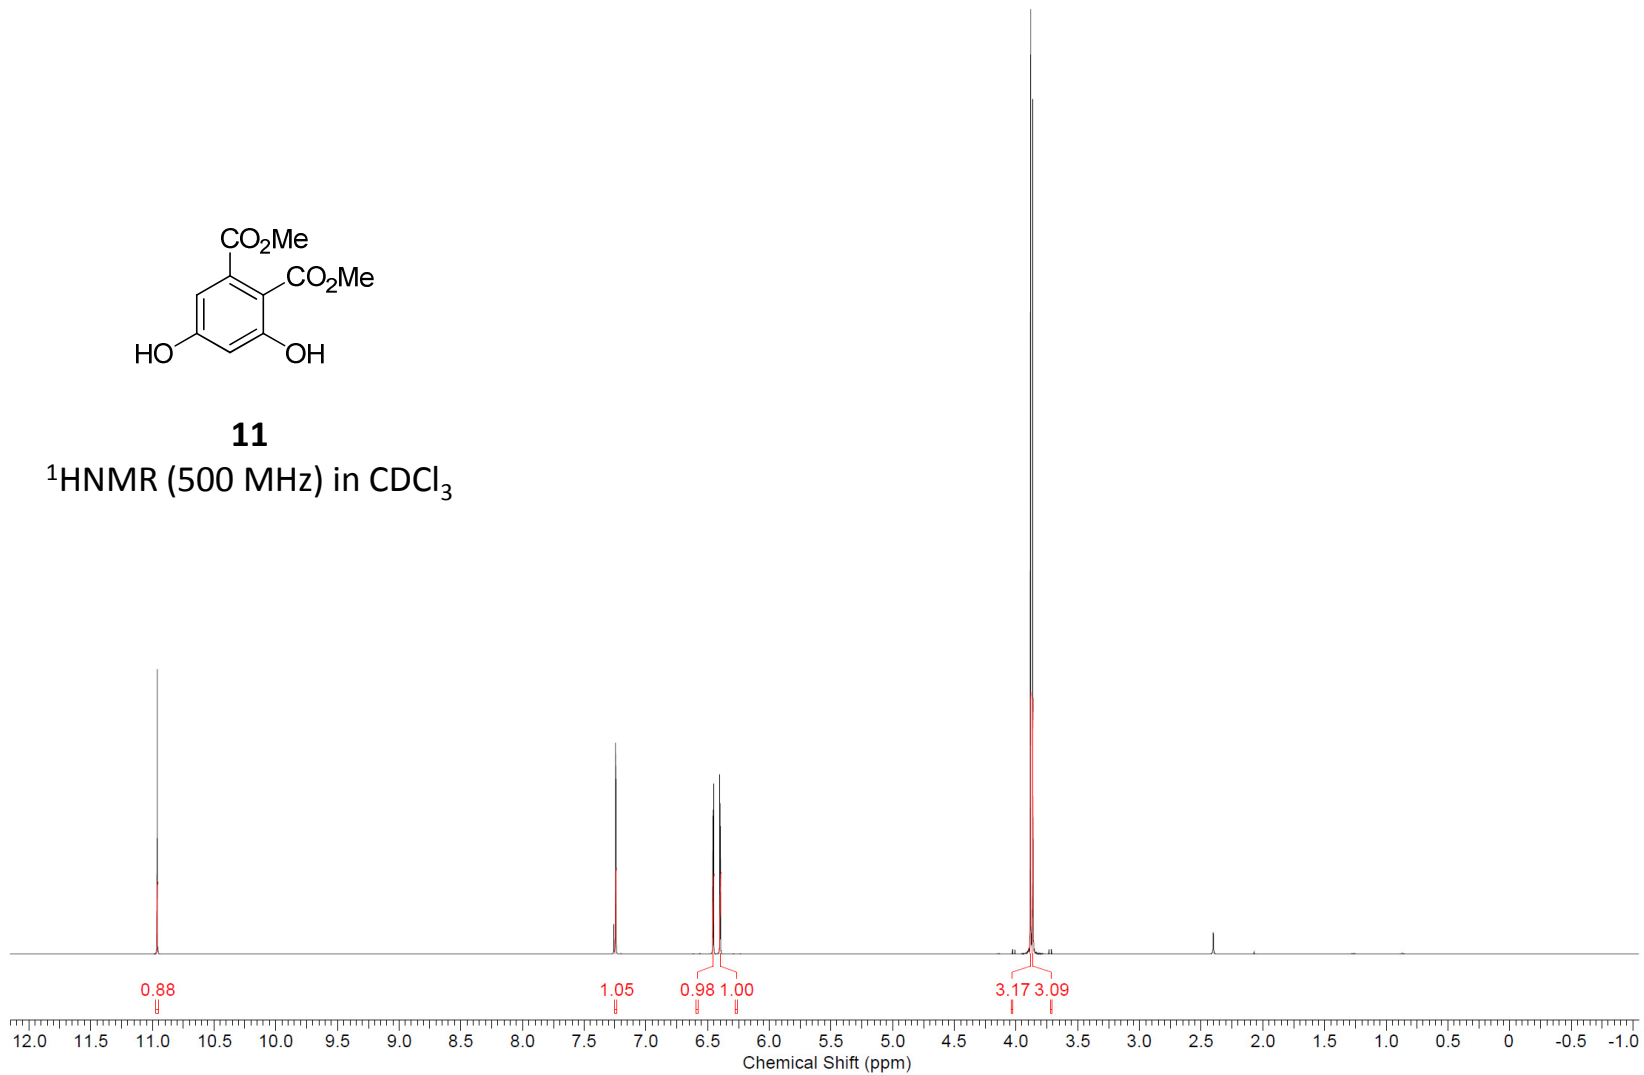

|                               |                                                                                     |                             |                |                               |              |                   |             |
|-------------------------------|-------------------------------------------------------------------------------------|-----------------------------|----------------|-------------------------------|--------------|-------------------|-------------|
| <b>Acquisition Time (sec)</b> | 1.4680                                                                              | <b>Comment</b>              | 00701217-E-215 | <b>Date</b>                   | Jun 17 2012  | <b>Date Stamp</b> | Jun 17 2012 |
| <b>File Name</b>              | \\UNITYH.PFIZER.COM\AUTO\2012\20120617\00701217-E-215_20120617_02\CARBON_01.FID\FID |                             |                | <b>Frequency (MHz)</b>        | 100.64       |                   |             |
| <b>Nucleus</b>                | 13C                                                                                 | <b>Number of Transients</b> | 512            | <b>Original Points Count</b>  | 32768        |                   |             |
| <b>Pulse Sequence</b>         | s2pul                                                                               | <b>Receiver Gain</b>        | 40.00          | <b>Solvent</b>                | CHLOROFORM-d |                   |             |
| <b>Spectrum Offset (Hz)</b>   | 10061.0127                                                                          | <b>Spectrum Type</b>        | STANDARD       | <b>Sweep Width (Hz)</b>       | 22321.43     |                   |             |
|                               |                                                                                     |                             |                | <b>Temperature (degree C)</b> | 25.000       |                   |             |

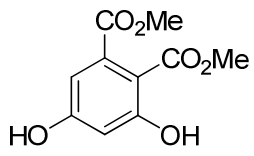

**11**

<sup>13</sup>CNMR (100 MHz) in CDCl<sub>3</sub>

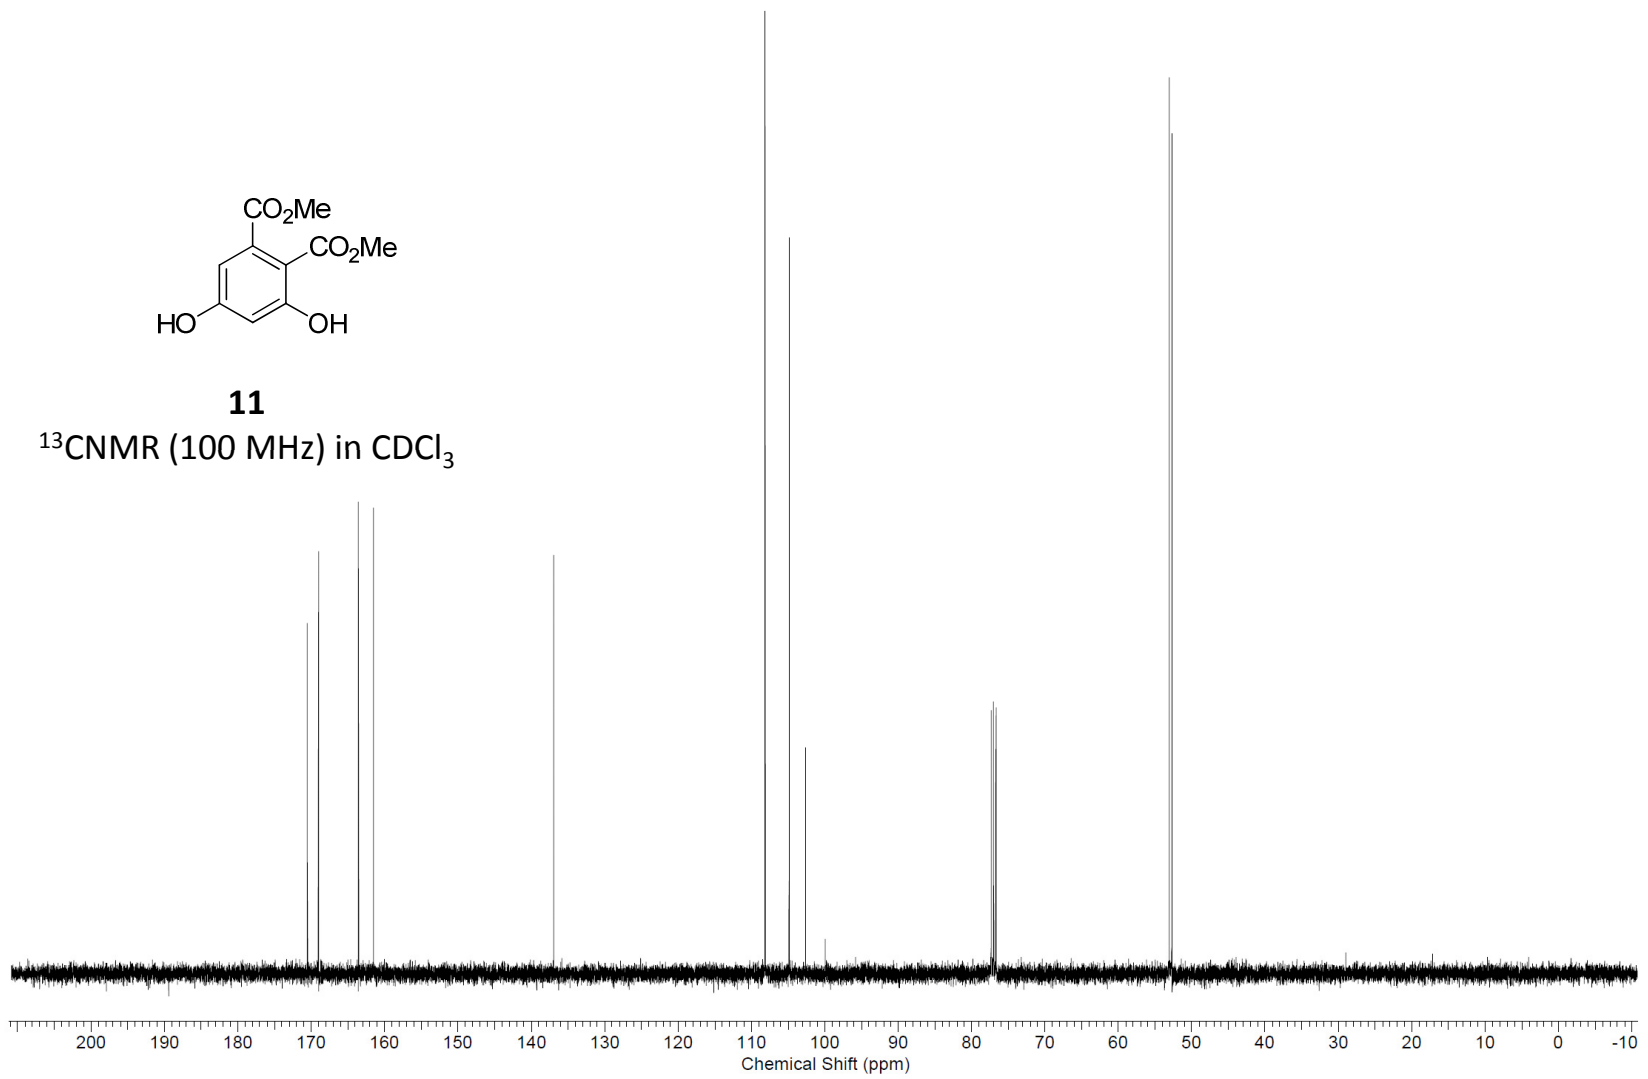

|                        |                                               |                        |              |                      |             |
|------------------------|-----------------------------------------------|------------------------|--------------|----------------------|-------------|
| Acquisition Time (sec) | 3.6815                                        | Date                   | Aug 22 2010  | Date Stamp           | Aug 22 2010 |
| File Name              | \\UNITYF.PFIZER.COM\SAMBA\100822\0401.FID\FID | Frequency (MHz)        | 399.83       | Nucleus              | 1H          |
| Number of Transients   | 16                                            | Original Points Count  | 23552        | Points Count         | 32768       |
| Receiver Gain          | 48.00                                         | Solvent                | CHLOROFORM-d | Spectrum Offset (Hz) | 2411.4619   |
| Sweep Width (Hz)       | 6397.44                                       | Temperature (degree C) | 25.000       |                      |             |

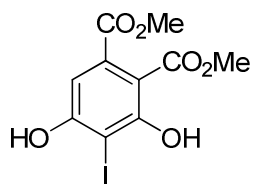

**8**

<sup>1</sup>HNMR (400 MHz) in CDCl<sub>3</sub>

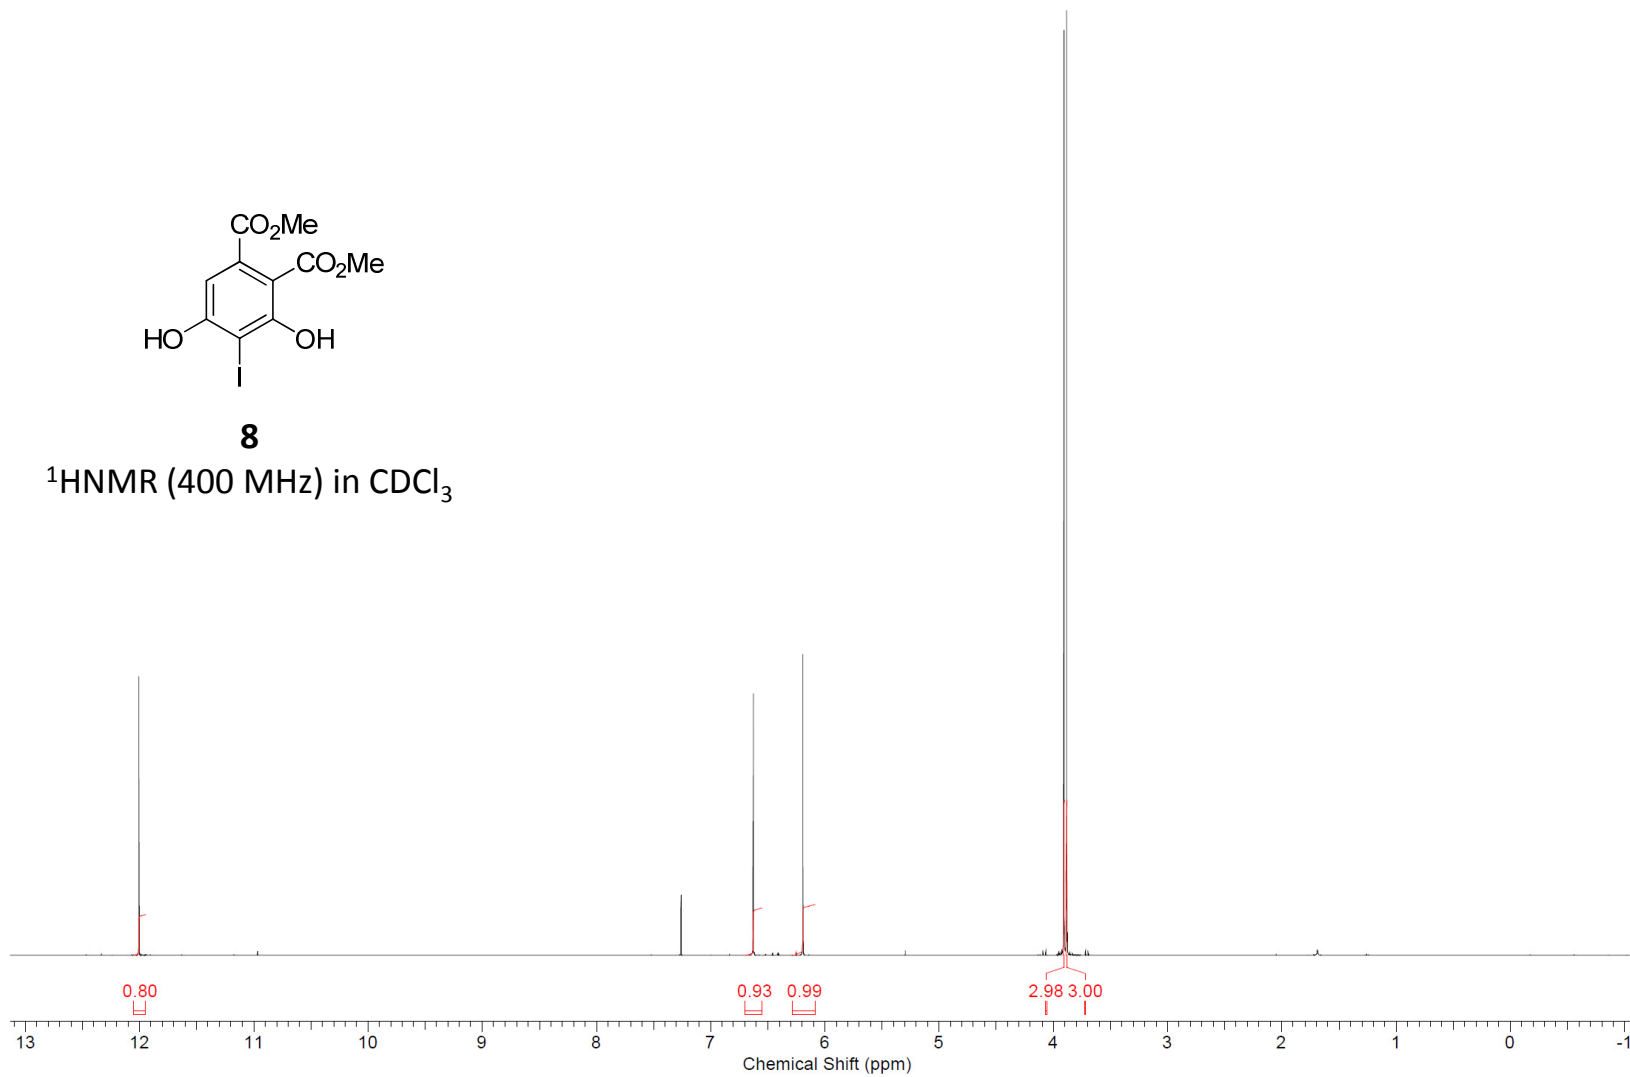

|                               |            |                             |                                                  |                               |              |
|-------------------------------|------------|-----------------------------|--------------------------------------------------|-------------------------------|--------------|
| <b>Acquisition Time (sec)</b> | 1.0871     | <b>Comment</b>              | 00701217-C139   Very long C-13 for dilute sample | <b>Date</b>                   | Jul 5 2012   |
| <b>Date Stamp</b>             | Jul 5 2012 | <b>File Name</b>            | \\UNITY1.PFIZER.COM\SAMBA\120705\4002.FID\FID    | <b>Frequency (MHz)</b>        | 125.63       |
| <b>Nucleus</b>                | 13C        | <b>Number of Transients</b> | 8192                                             | <b>Original Points Count</b>  | 32768        |
| <b>Pulse Sequence</b>         | s2pul      | <b>Receiver Gain</b>        | 60.00                                            | <b>Solvent</b>                | CHLOROFORM-d |
| <b>Spectrum Offset (Hz)</b>   | 12529.5928 | <b>Spectrum Type</b>        | STANDARD                                         | <b>Sweep Width (Hz)</b>       | 30143.18     |
|                               |            |                             |                                                  | <b>Temperature (degree C)</b> | 25.000       |



**8**

<sup>13</sup>CNMR (125 MHz) in CDCl<sub>3</sub>

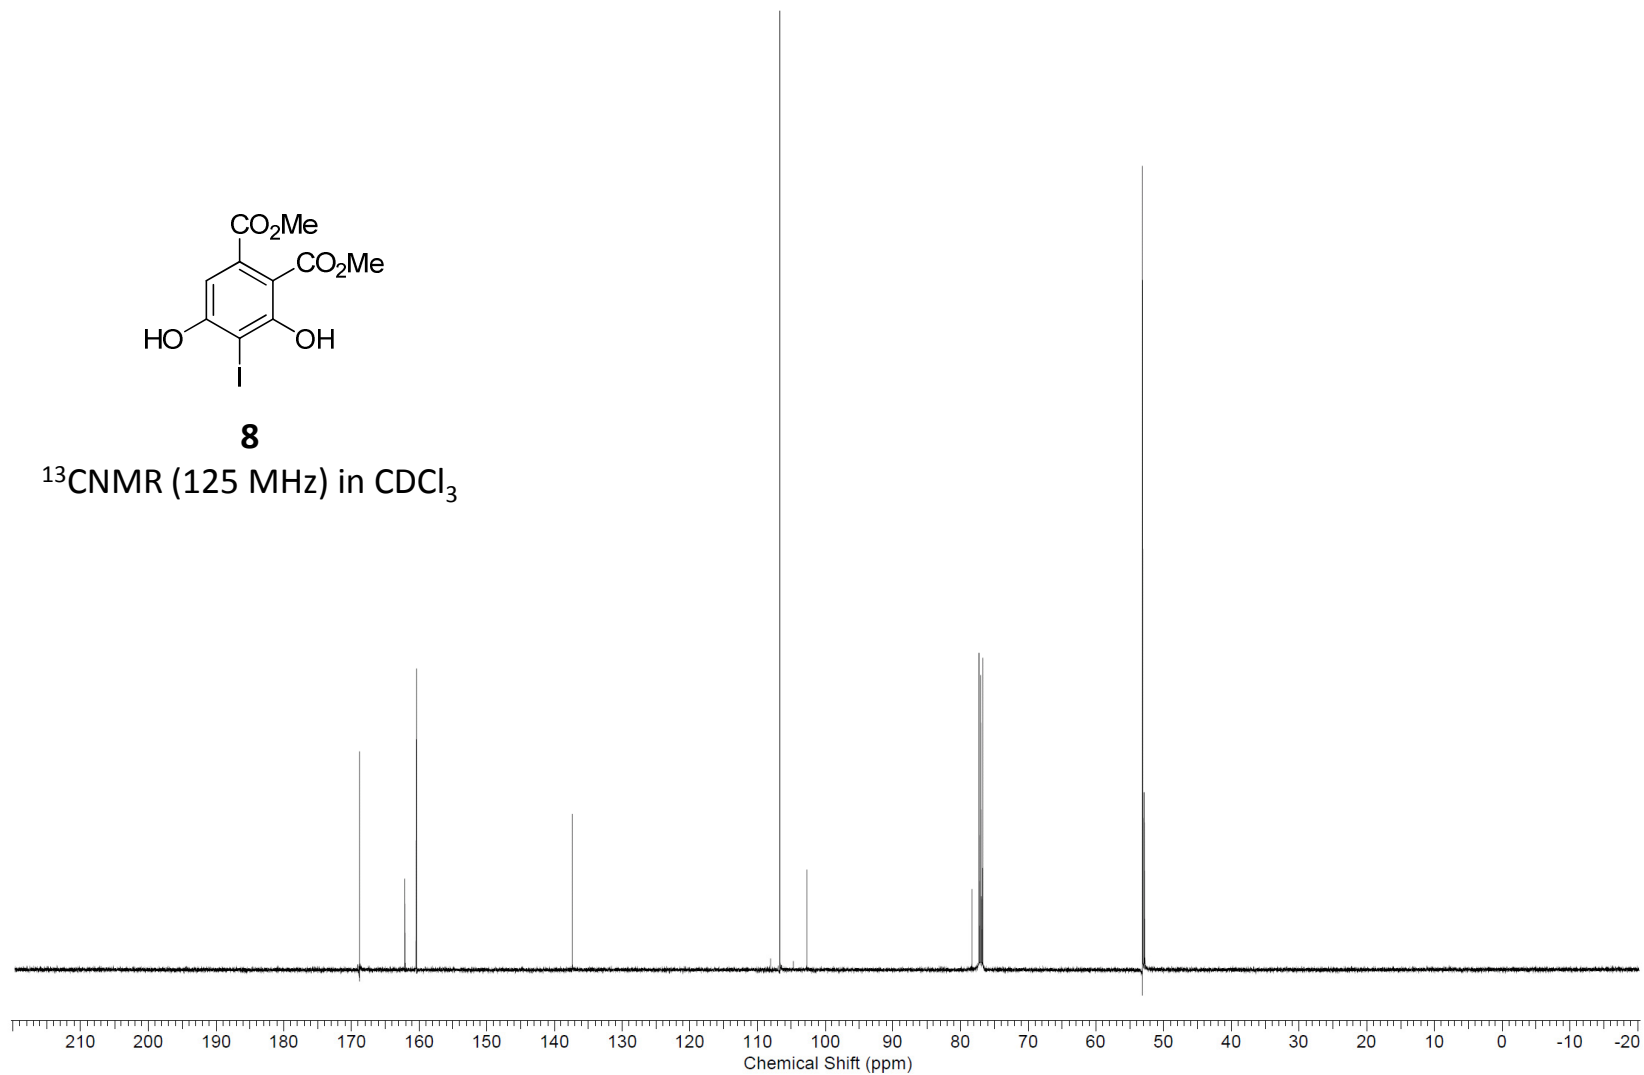

|                        |             |                      |                                               |                       |                 |                        |        |
|------------------------|-------------|----------------------|-----------------------------------------------|-----------------------|-----------------|------------------------|--------|
| Acquisition Time (sec) | 3.6815      | Comment              | 00701217-D159                                 |                       | Date            | Mar 18 2011            |        |
| Date Stamp             | Mar 18 2011 | File Name            | \\UNITYF.PFIZER.COM\SAMBA\110318\1601.FID\FID |                       | Frequency (MHz) | 399.83                 |        |
| Nucleus                | 1H          | Number of Transients | 16                                            | Original Points Count | 23552           | Points Count           | 32768  |
| Pulse Sequence         | s2pul       | Receiver Gain        | 48.00                                         | Solvent               | CHLOROFORM-d    |                        |        |
| Spectrum Offset (Hz)   | 2411.8523   | Spectrum Type        | STANDARD                                      | Sweep Width (Hz)      | 6397.44         | Temperature (degree C) | 25.000 |

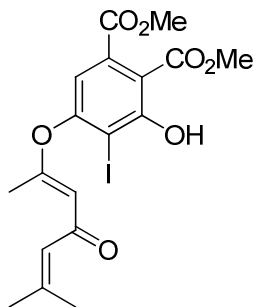

**13**

<sup>1</sup>HNMR (400 MHz) in CDCl<sub>3</sub>

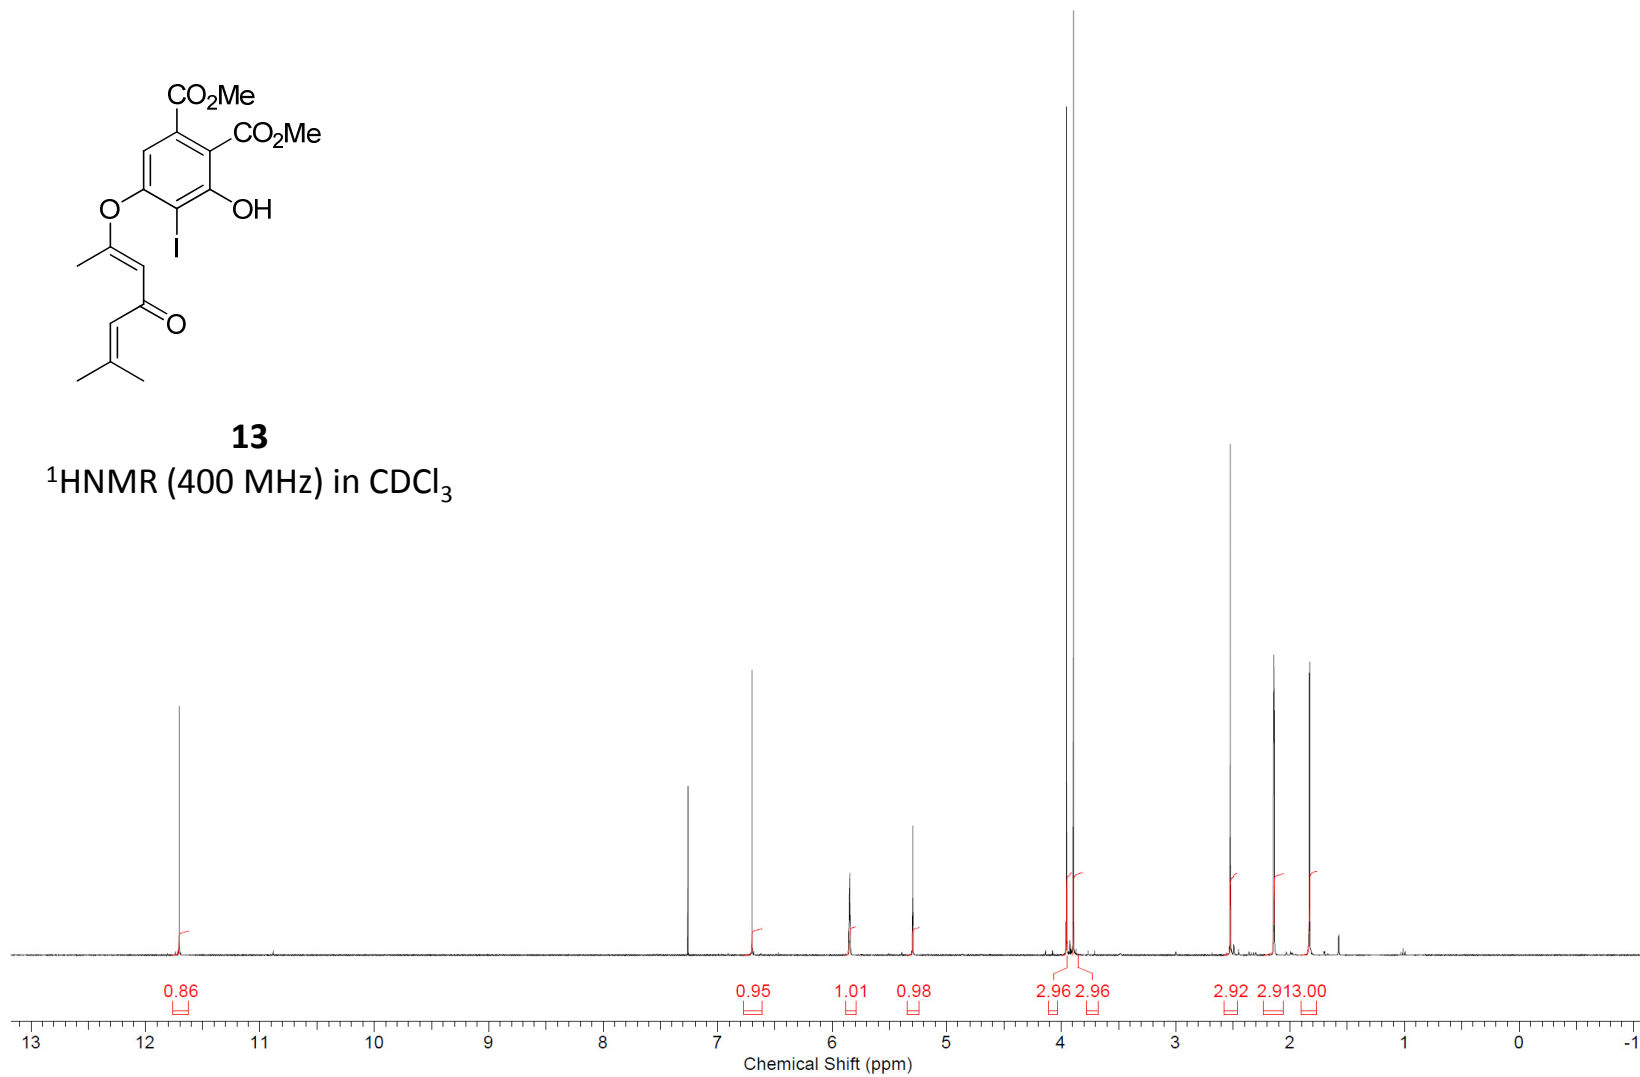



|                               |             |                             |                                                  |                               |              |
|-------------------------------|-------------|-----------------------------|--------------------------------------------------|-------------------------------|--------------|
| <b>Acquisition Time (sec)</b> | 1.3582      | <b>Comment</b>              | 00701217-D159 Longer C-13 for more dilute sample | <b>Date</b>                   | Mar 18 2011  |
| <b>Date Stamp</b>             | Mar 18 2011 | <b>File Name</b>            | \\UNITYF.PFIZER.COM\SAMBA\110318\9002.FID\FID    | <b>Frequency (MHz)</b>        | 100.55       |
| <b>Nucleus</b>                | 13C         | <b>Number of Transients</b> | 2048                                             | <b>Original Points Count</b>  | 32768        |
| <b>Pulse Sequence</b>         | s2pul       | <b>Receiver Gain</b>        | 60.00                                            | <b>Solvent</b>                | CHLOROFORM-d |
| <b>Spectrum Offset (Hz)</b>   | 10033.0625  | <b>Spectrum Type</b>        | STANDARD                                         | <b>Sweep Width (Hz)</b>       | 24125.45     |
|                               |             |                             |                                                  | <b>Temperature (degree C)</b> | 25.000       |

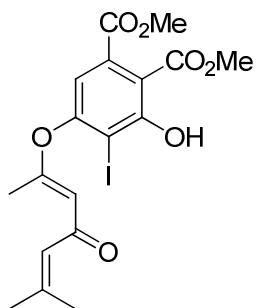

**13**

<sup>13</sup>CNMR (100 MHz) in CDCl<sub>3</sub>

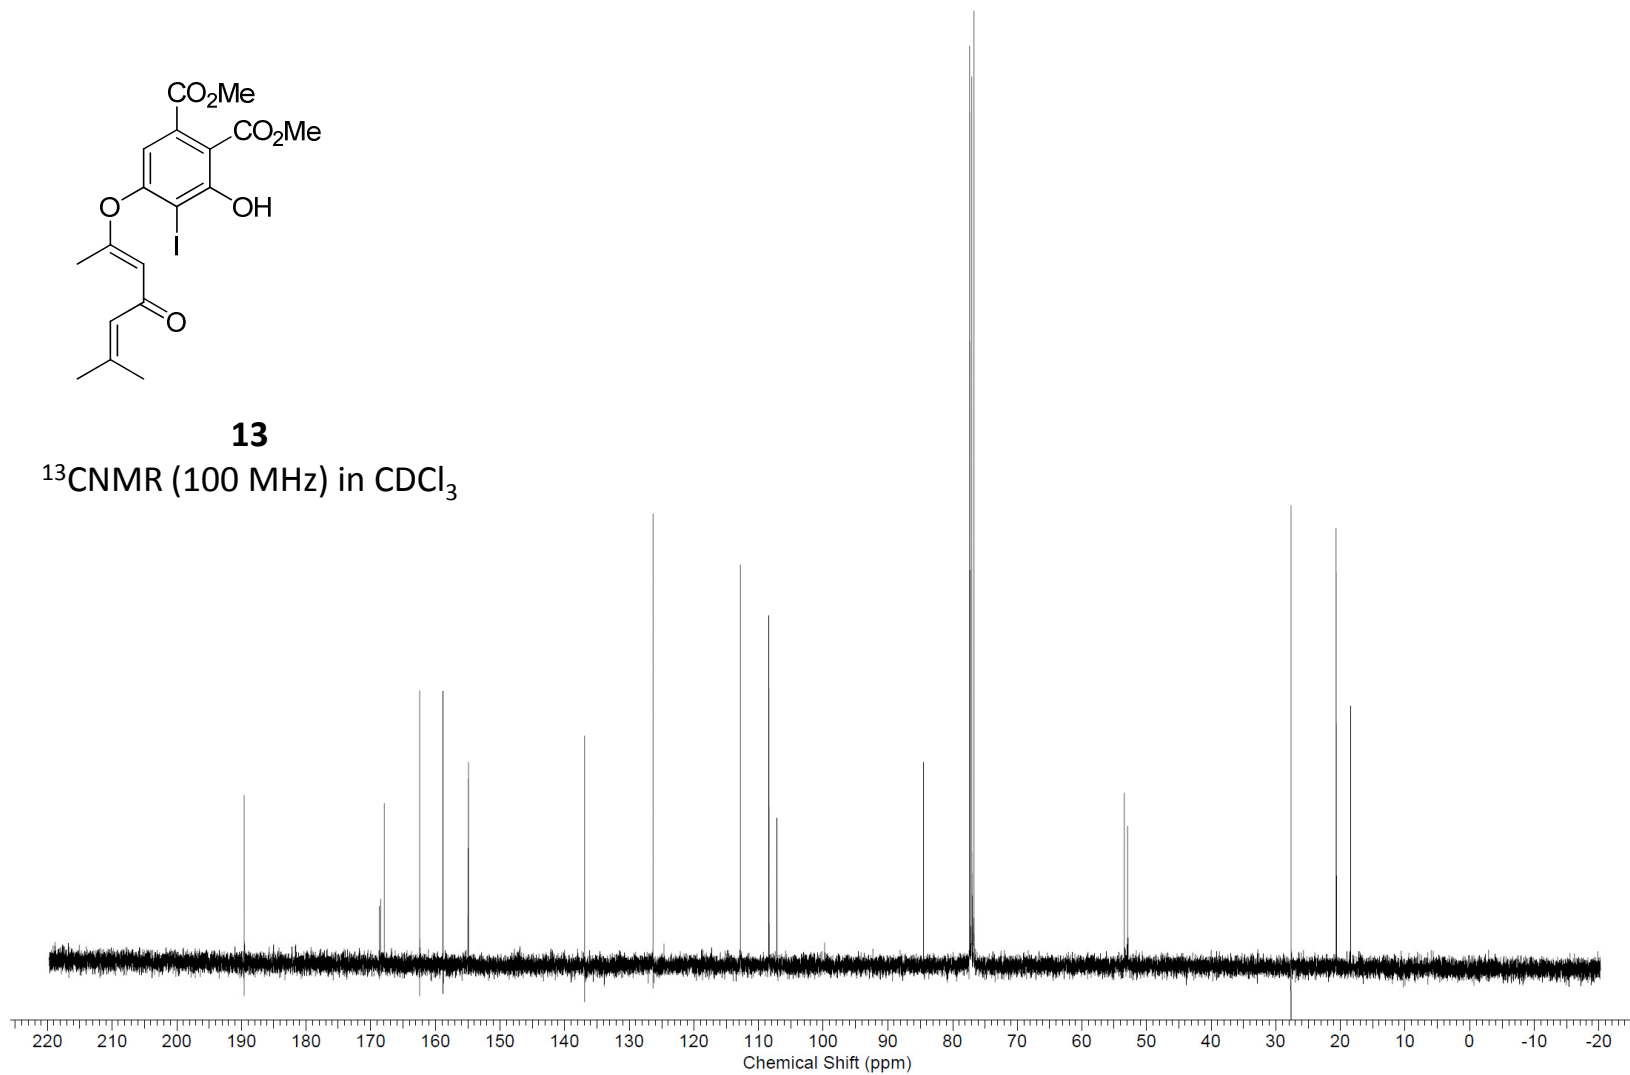

|                        |                                               |                        |              |                      |             |
|------------------------|-----------------------------------------------|------------------------|--------------|----------------------|-------------|
| Acquisition Time (sec) | 3.6815                                        | Date                   | Nov 22 2010  | Date Stamp           | Nov 22 2010 |
| File Name              | \\UNITYF.PFIZER.COM\SAMBA\101122\1601.FID\FID | Frequency (MHz)        | 399.83       | Nucleus              | 1H          |
| Number of Transients   | 16                                            | Original Points Count  | 23552        | Points Count         | 32768       |
| Receiver Gain          | 42.00                                         | Solvent                | CHLOROFORM-d | Spectrum Offset (Hz) | 2411.6570   |
| Sweep Width (Hz)       | 6397.44                                       | Temperature (degree C) | 25.000       |                      |             |

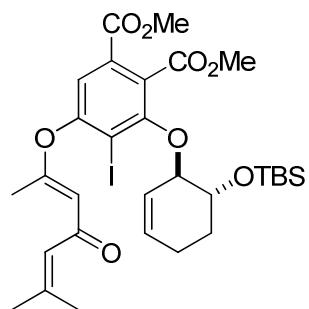

**7b**

$^1\text{H}$ NMR (400 MHz) in  $\text{CDCl}_3$

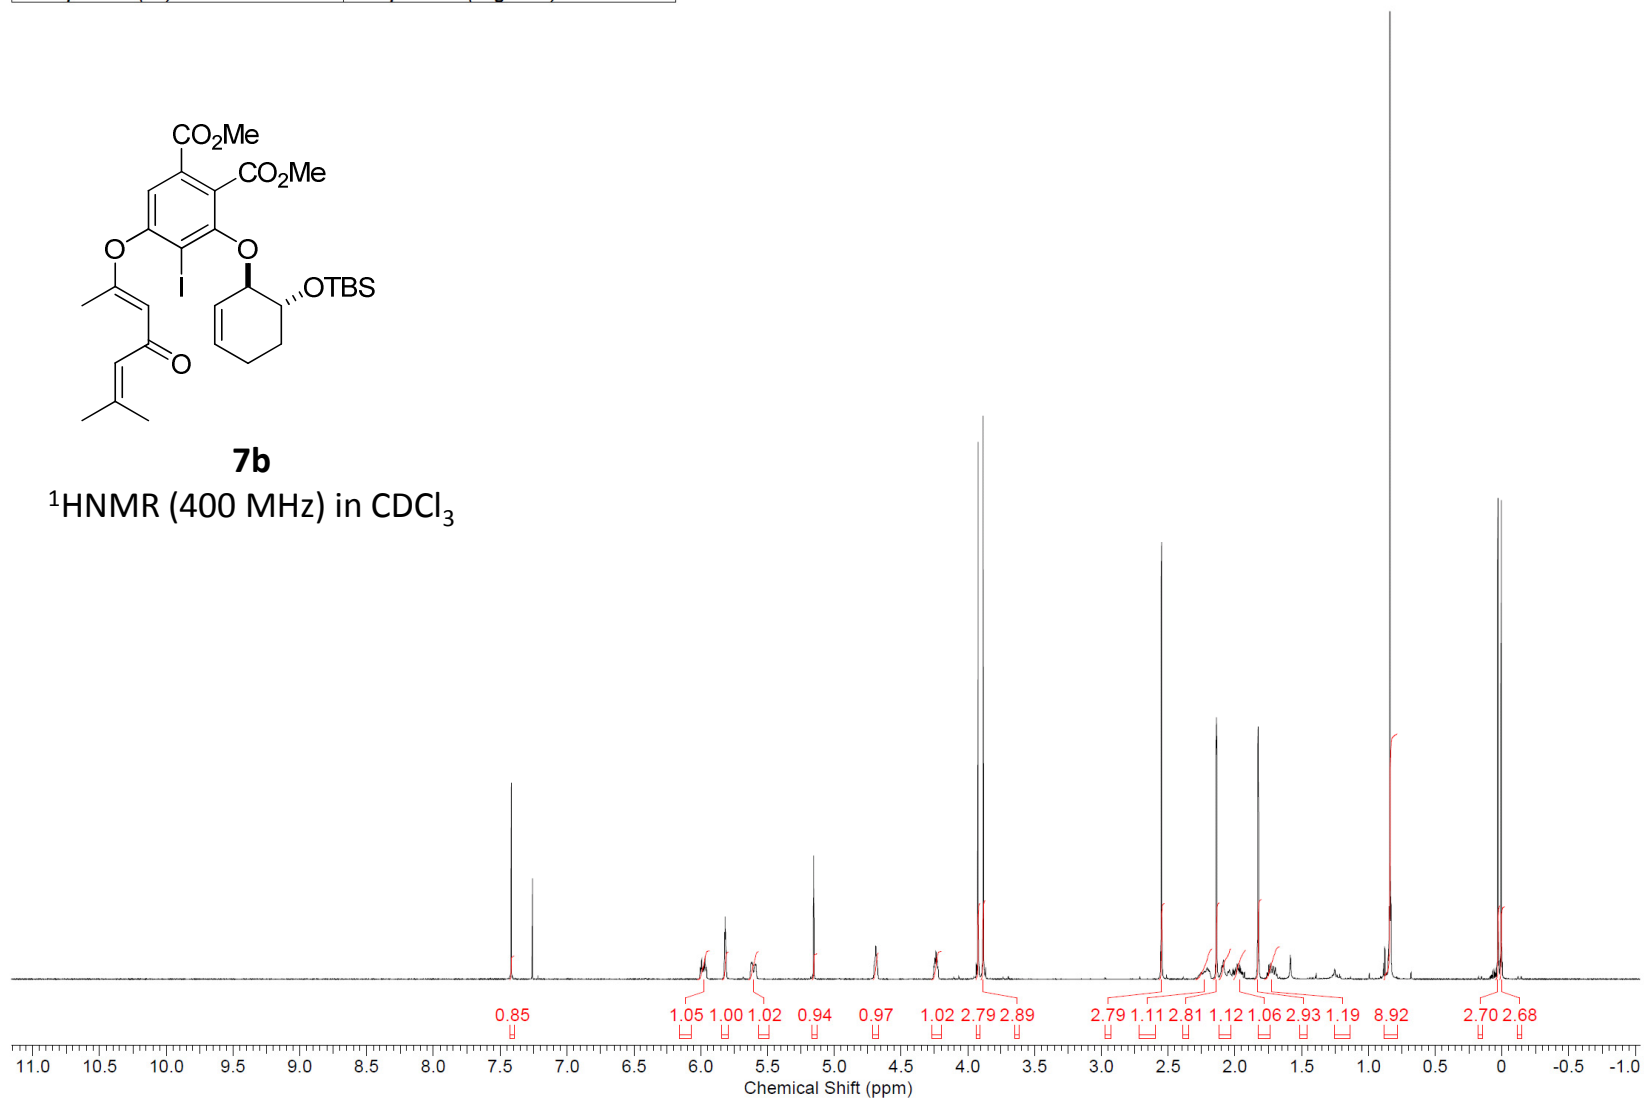

|                        |                                               |                        |              |                      |             |
|------------------------|-----------------------------------------------|------------------------|--------------|----------------------|-------------|
| Acquisition Time (sec) | 1.3582                                        | Date                   | Nov 23 2010  | Date Stamp           | Nov 23 2010 |
| File Name              | \\UNITYF.PFIZER.COM\SAMBA\101122\9102.FID\FID | Frequency (MHz)        | 100.55       | Nucleus              | 13C         |
| Number of Transients   | 2048                                          | Original Points Count  | 32768        | Points Count         | 32768       |
| Receiver Gain          | 60.00                                         | Solvent                | CHLOROFORM-d | Pulse Sequence       | s2pul       |
| Sweep Width (Hz)       | 24125.45                                      | Temperature (degree C) | 25.000       | Spectrum Offset (Hz) | 10517.7051  |

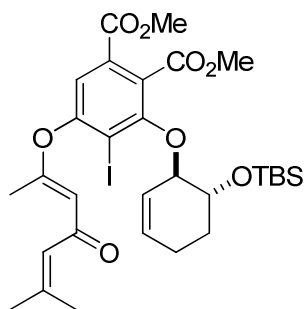

**7b**

$^{13}\text{C}$ NMR (100 MHz) in  $\text{CDCl}_3$

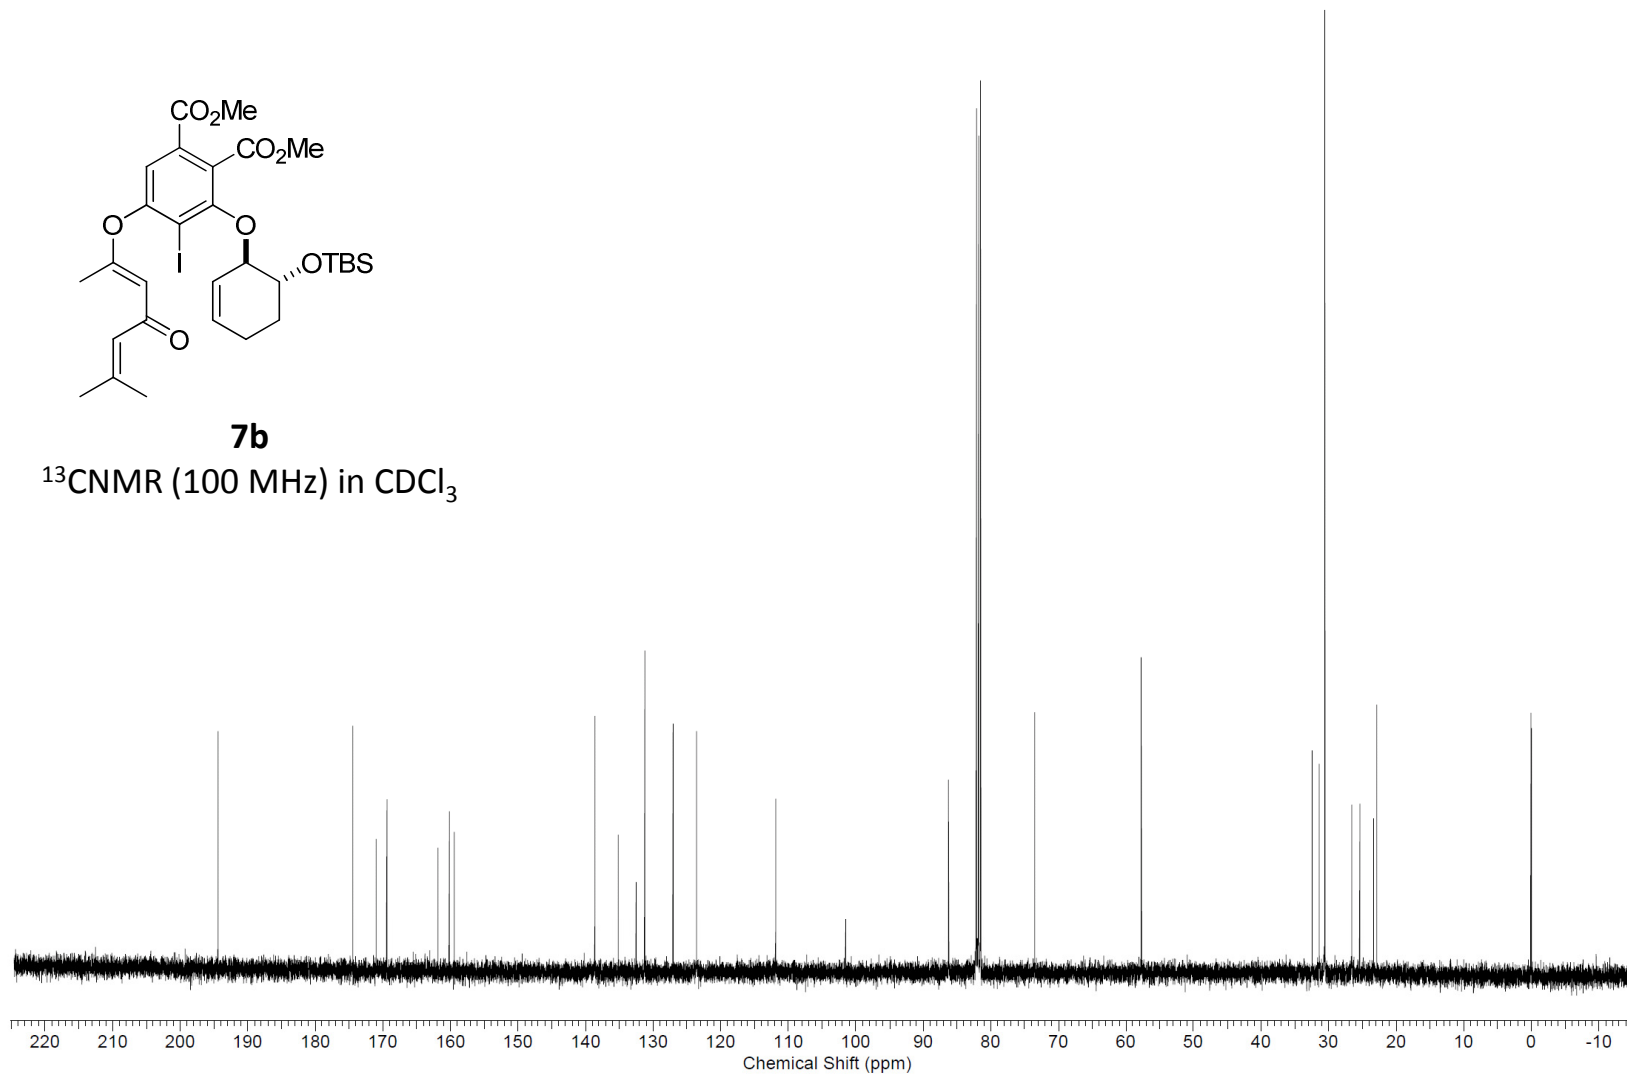

|                               |                                                                                        |                              |                      |                               |             |
|-------------------------------|----------------------------------------------------------------------------------------|------------------------------|----------------------|-------------------------------|-------------|
| <b>Acquisition Time (sec)</b> | 2.5625                                                                                 | <b>Comment</b>               |                      |                               |             |
| <b>Date</b>                   | 13 Apr 2012 09:52:00                                                                   | <b>Date Stamp</b>            | 13 Apr 2012 09:52:00 |                               |             |
| <b>File Name</b>              | \\AMRGROB10025582.AMER.PFIZER.COM\BKDATA: DATA\AMENDC01\NMR\00701217-E239\2\PDATA\1\1r |                              |                      |                               |             |
| <b>Frequency (MHz)</b>        | 399.54                                                                                 | <b>Nucleus</b>               | 1H                   | <b>Number of Transients</b>   | 16          |
| <b>Origin</b>                 | spect                                                                                  | <b>Original Points Count</b> | 16384                | <b>Owner</b>                  | FCNGRO-BRKO |
| <b>Points Count</b>           | 65536                                                                                  | <b>Pulse Sequence</b>        | zg30                 | <b>Receiver Gain</b>          | 114.00      |
| <b>SW(cyclical) (Hz)</b>      | 6393.86                                                                                | <b>Solvent</b>               | CHLOROFORM-d         | <b>Spectrum Offset (Hz)</b>   | 2385.2864   |
| <b>Spectrum Type</b>          | STANDARD                                                                               | <b>Sweep Width (Hz)</b>      | 6393.76              | <b>Temperature (degree C)</b> | 25.152      |

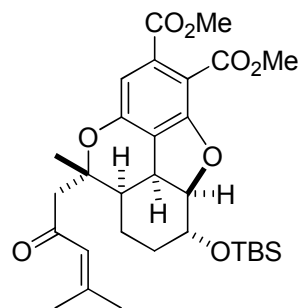

**6b**

<sup>1</sup>HNMR (400 MHz) in CDCl<sub>3</sub>

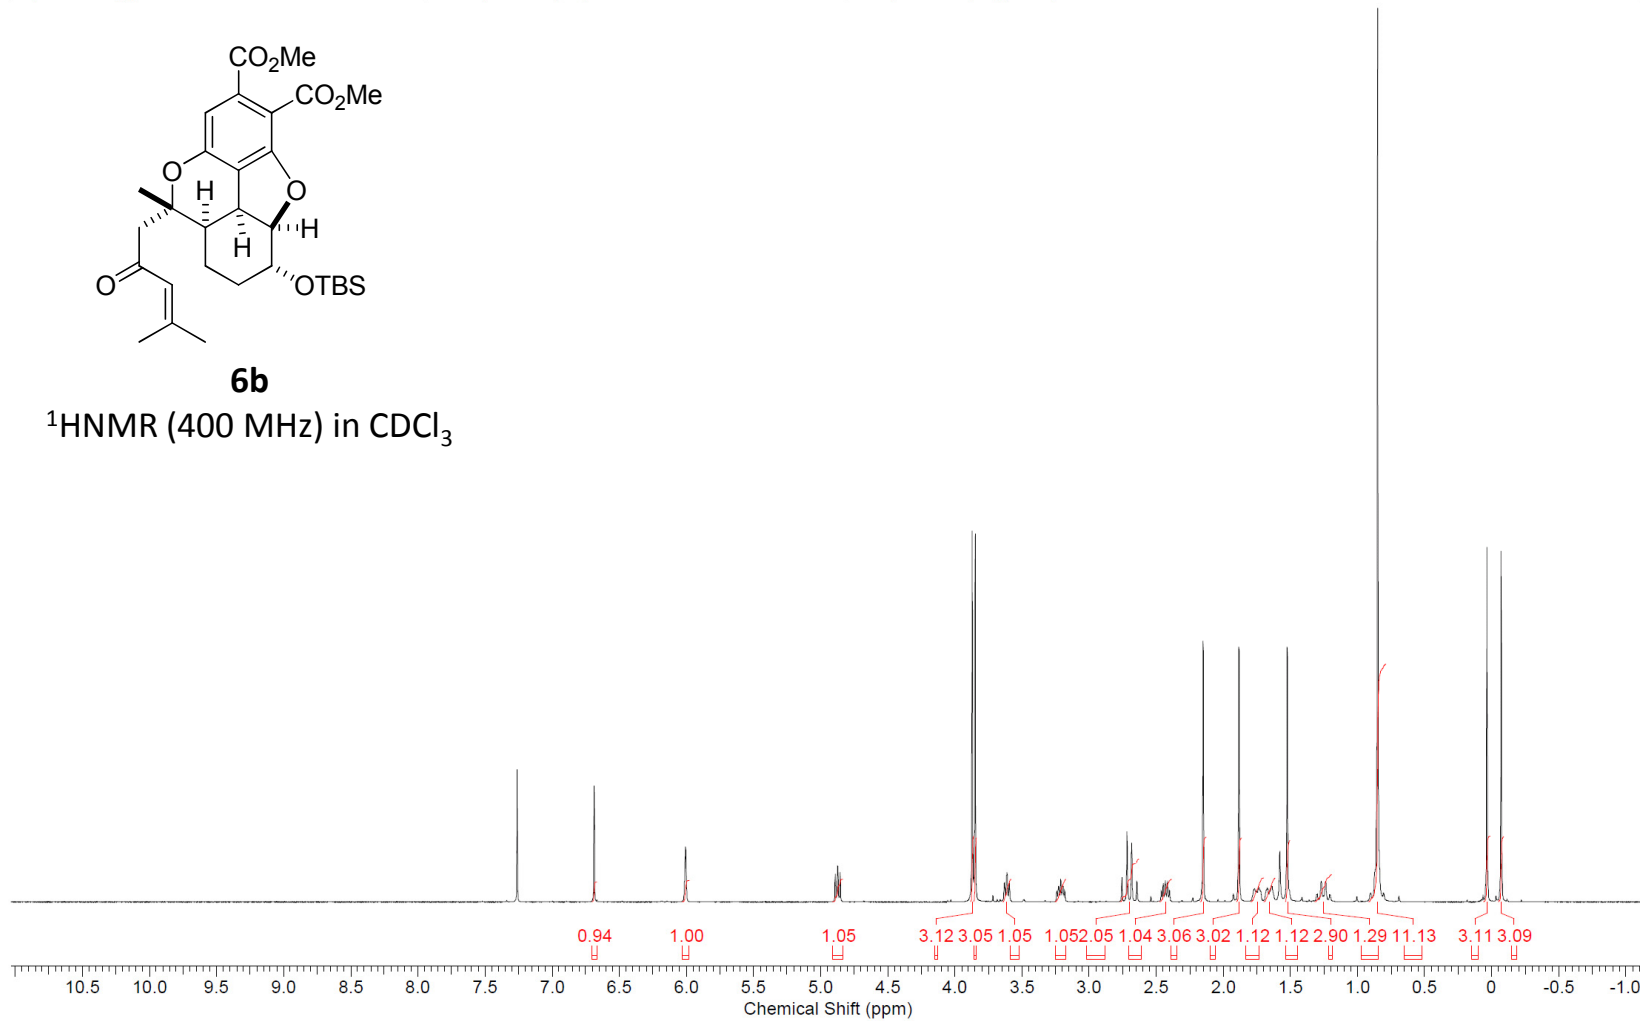

|                               |                                                                                     |                             |                |                              |              |                               |             |
|-------------------------------|-------------------------------------------------------------------------------------|-----------------------------|----------------|------------------------------|--------------|-------------------------------|-------------|
| <b>Acquisition Time (sec)</b> | 1.2788                                                                              | <b>Comment</b>              | 00701217-E-239 | <b>Date</b>                  | Sep 20 2012  | <b>Date Stamp</b>             | Sep 20 2012 |
| <b>File Name</b>              | \\UNITYH.PFIZER.COM\AUTO\2012\20120920\00701217-E-239_20120920_01\CARBON_01.FID\FID | <b>Number of Transients</b> | 16384          | <b>Original Points Count</b> | 28544        | <b>Frequency (MHz)</b>        | 100.64      |
| <b>Nucleus</b>                | 13C                                                                                 | <b>Receiver Gain</b>        | 40.00          | <b>Solvent</b>               | CHLOROFORM-d | <b>Points Count</b>           | 32768       |
| <b>Pulse Sequence</b>         | s2pul                                                                               | <b>Spectrum Offset (Hz)</b> | 10063.0029     | <b>Spectrum Type</b>         | STANDARD     | <b>Sweep Width (Hz)</b>       | 22321.43    |
|                               |                                                                                     |                             |                |                              |              | <b>Temperature (degree C)</b> | 25.000      |

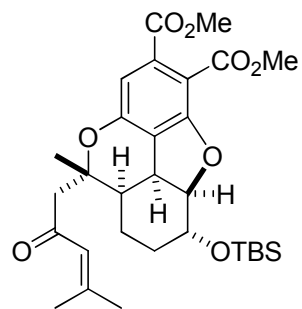

**6b**

<sup>13</sup>CNMR (100 MHz) in CDCl<sub>3</sub>

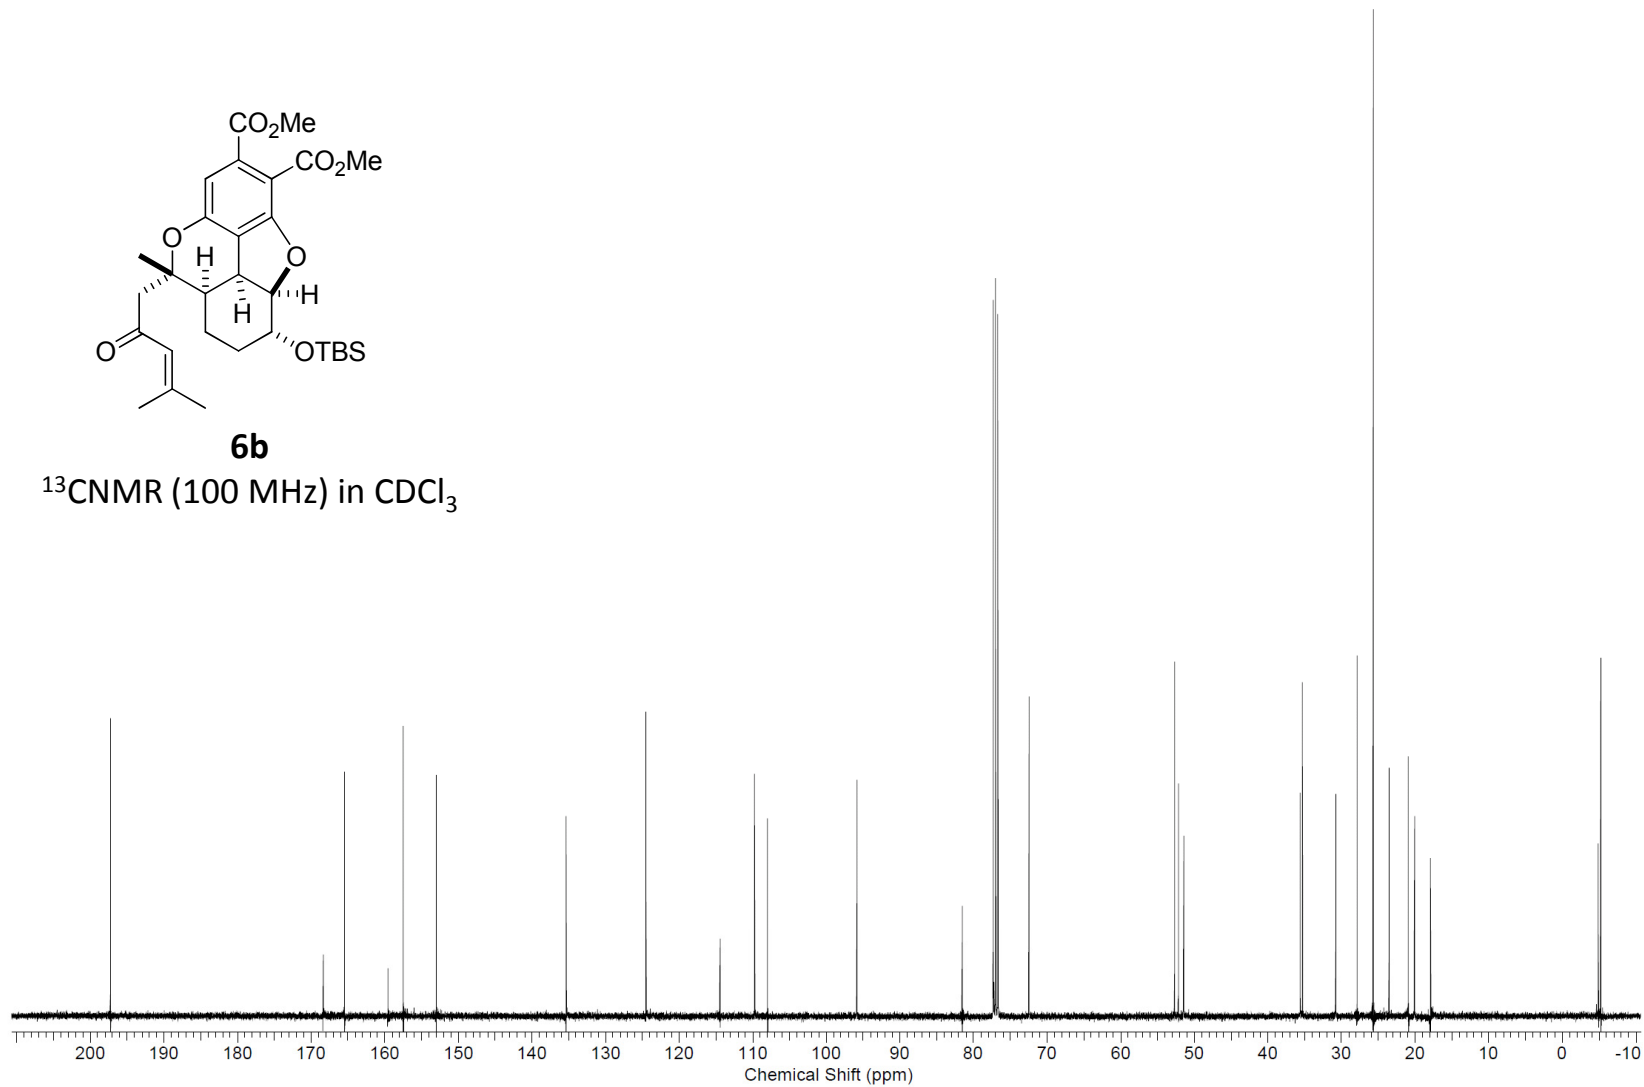

|                        |                                                                                                                    |                |                   |                      |             |                        |              |
|------------------------|--------------------------------------------------------------------------------------------------------------------|----------------|-------------------|----------------------|-------------|------------------------|--------------|
| Acquisition Time (sec) | 2.5559                                                                                                             | Comment        | 00701217-E239-361 | Date                 | Jun 19 2012 | Date Stamp             | Jun 19 2012  |
| File Name              | C:\DOCUME~1\AMENDC01\LOCALS~1\TEMP\GAINS9192.TMP\PRODUCTION\UNITY\AMENDC01\00701217-E239-361_2012171110916.FID\FID |                |                   |                      |             |                        |              |
| Frequency (MHz)        | 400.20                                                                                                             | Nucleus        | 1H                | Number of Transients | 64          | Original Points Count  | 16384        |
| Points Count           | 16384                                                                                                              | Pulse Sequence | NOESY1D           | Receiver Gain        | 30.00       | Solvent                | CHLOROFORM-d |
| Spectrum Offset (Hz)   | 2401.1633                                                                                                          | Spectrum Type  | STANDARD          | Sweep Width (Hz)     | 6410.26     | Temperature (degree C) | 25.000       |

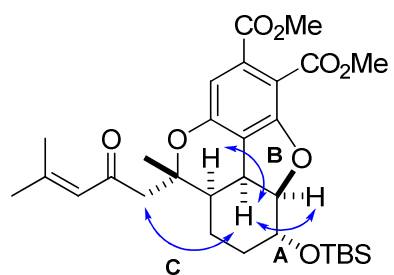

**6b**  
NOE 3.61 ppm

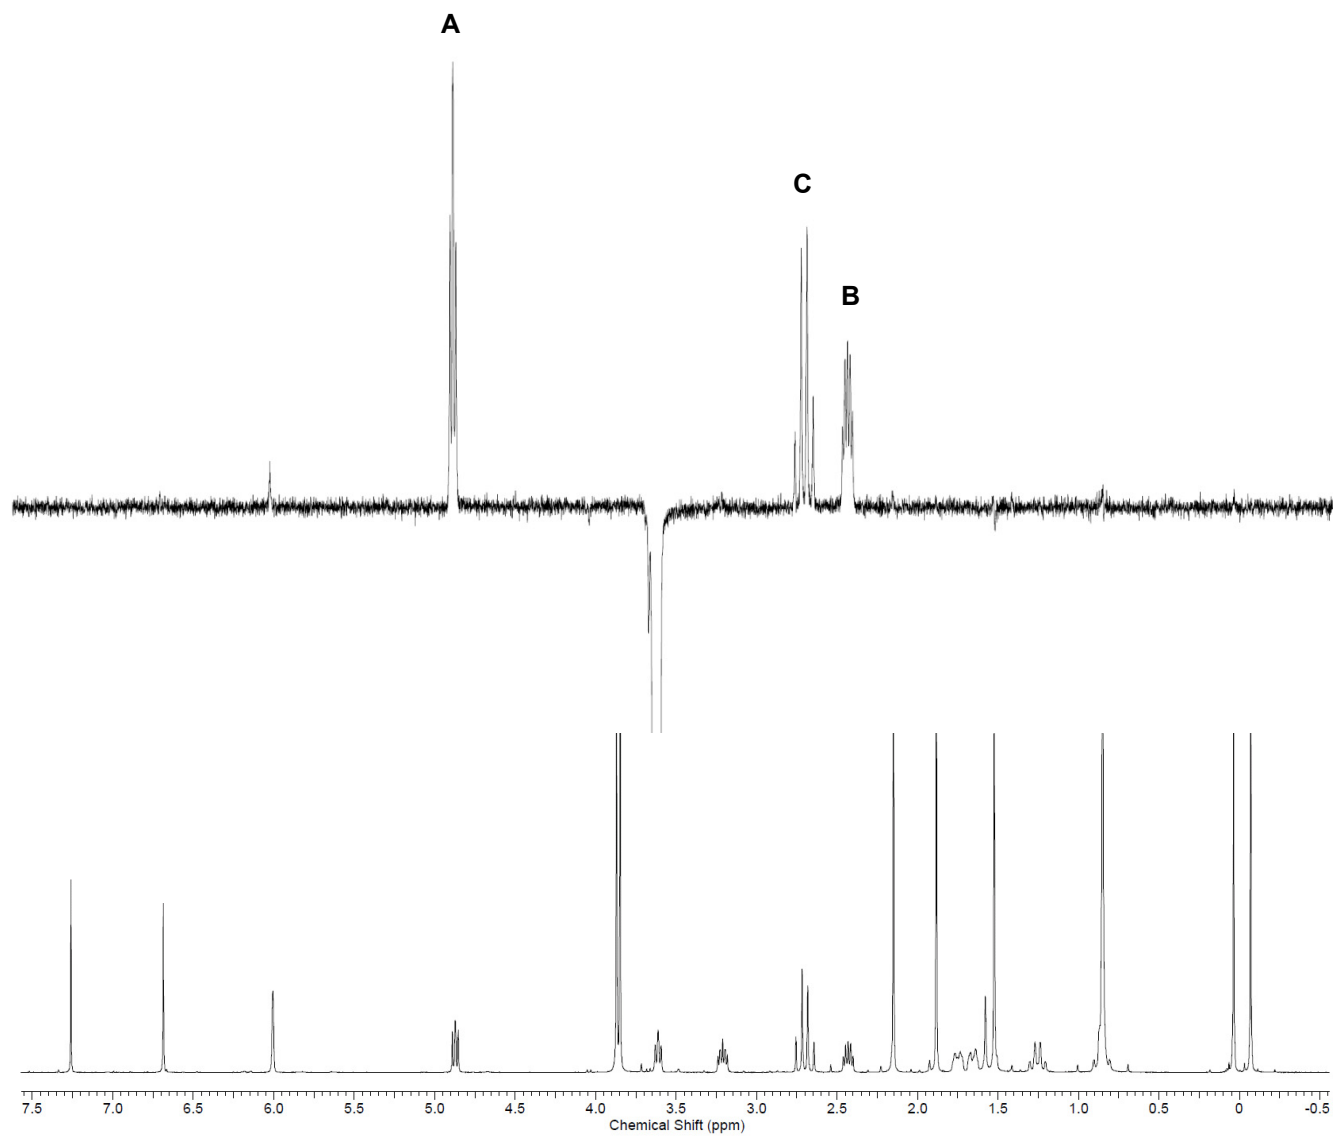

|                        |             |                      |                                               |                        |              |
|------------------------|-------------|----------------------|-----------------------------------------------|------------------------|--------------|
| Acquisition Time (sec) | 2.9464      | Comment              | 00701217-E239-364                             | Date                   | Jul 28 2012  |
| Date Stamp             | Jul 28 2012 | File Name            | \\UNITY1.PFIZER.COM\SAMBA\120728\0401.FID\FID | Frequency (MHz)        | 499.58       |
| Nucleus                | 1H          | Number of Transients | 16                                            | Original Points Count  | 23552        |
| Pulse Sequence         | s2pul       | Receiver Gain        | 42.00                                         | Solvent                | CHLOROFORM-d |
| Spectrum Offset (Hz)   | 2992.8242   | Spectrum Type        | STANDARD                                      | Sweep Width (Hz)       | 7993.60      |
|                        |             |                      |                                               | Temperature (degree C) | 25.000       |

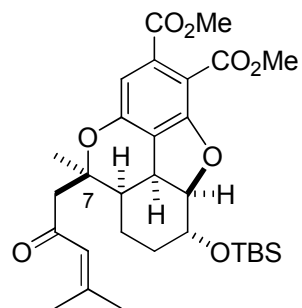

**C-7-epi-6b**

<sup>1</sup>HNMR (500 MHz) in CDCl<sub>3</sub>

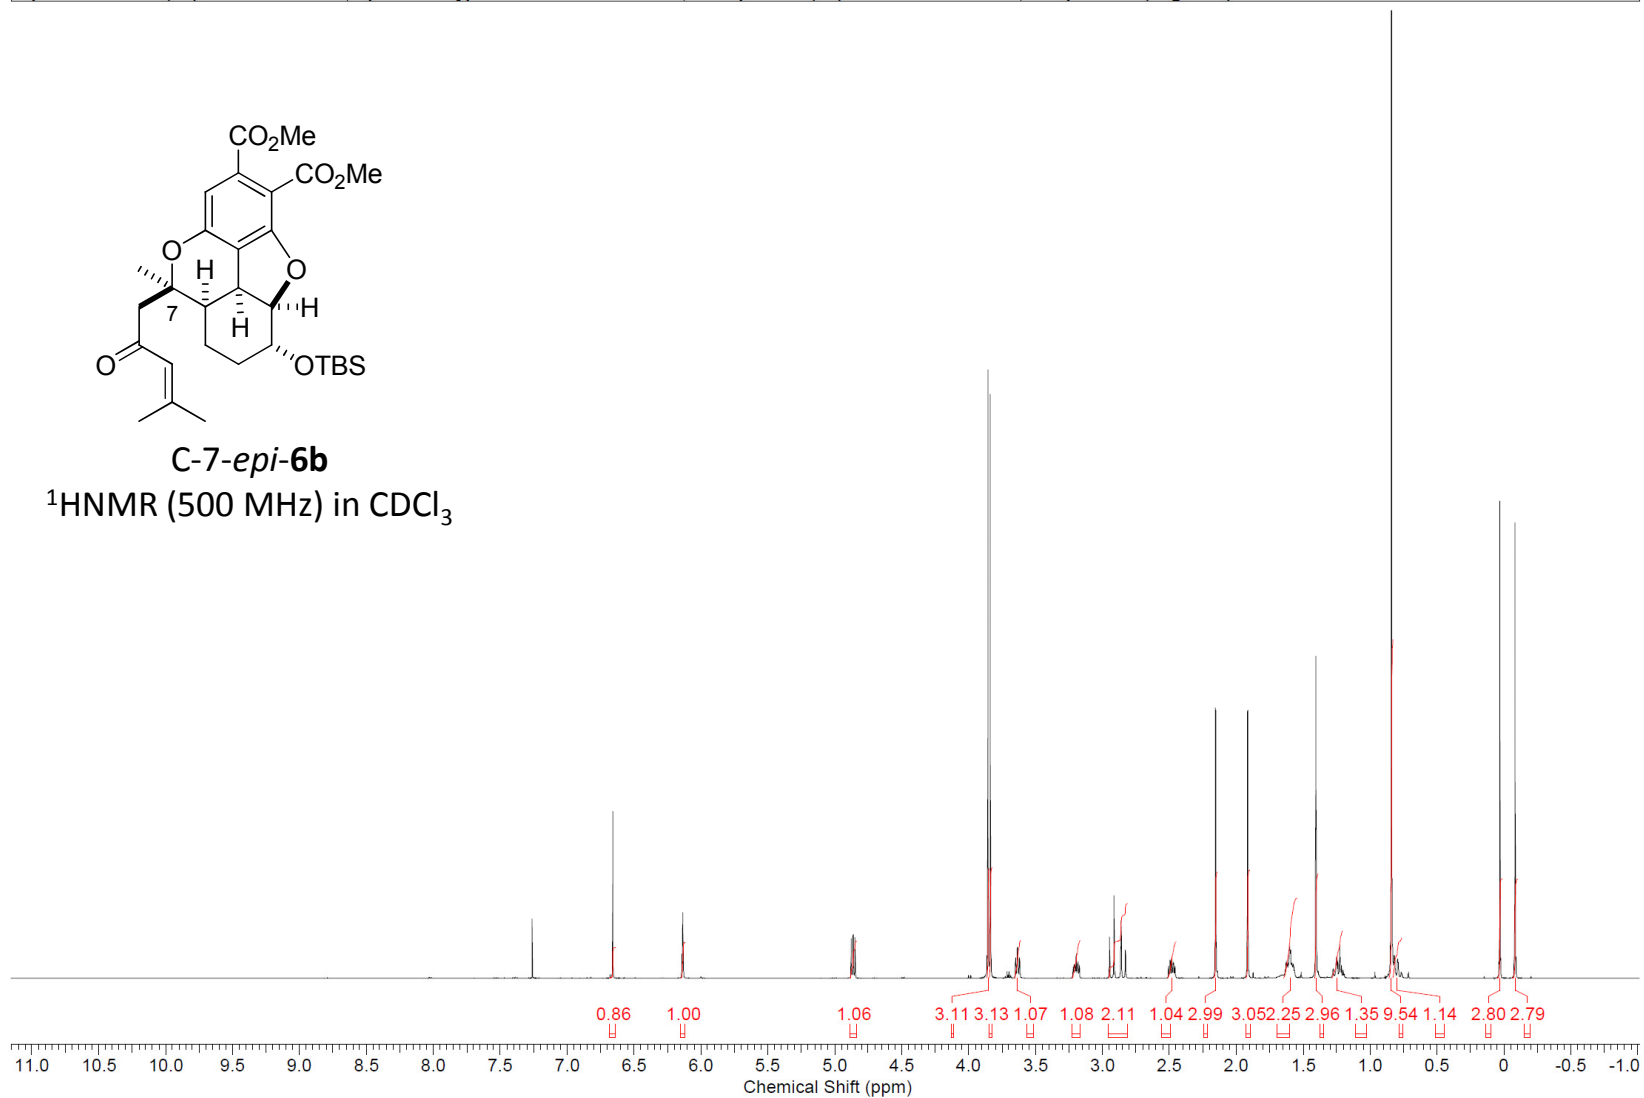

|                               |                                                                                     |                              |                      |                                        |
|-------------------------------|-------------------------------------------------------------------------------------|------------------------------|----------------------|----------------------------------------|
| <b>Acquisition Time (sec)</b> | 1.3631                                                                              | <b>Comment</b>               |                      | 5                                      |
| <b>Date</b>                   | 01 Aug 2012 00:22:24                                                                | <b>Date Stamp</b>            | 01 Aug 2012 00:22:24 |                                        |
| <b>File Name</b>              | \\AMRGROB10025582.AMER.PFIZER.COM\BKDATA\DATA\AMENDC01\NMR\00701217-E239-CNMR\1\FID |                              |                      |                                        |
| <b>Frequency (MHz)</b>        | 100.46                                                                              | <b>Nucleus</b>               | 13C                  | <b>Number of Transients</b> 8192       |
| <b>Origin</b>                 | spect                                                                               | <b>Original Points Count</b> | 32768                | <b>Owner</b> FCNGRO-BRKO               |
| <b>Points Count</b>           | 32768                                                                               | <b>Pulse Sequence</b>        | zgpg30               | <b>Receiver Gain</b> 228.00            |
| <b>SW(cyclical) (Hz)</b>      | 24038.46                                                                            | <b>Solvent</b>               | CHLOROFORM-d         | <b>Spectrum Offset (Hz)</b> 10046.9531 |
| <b>Spectrum Type</b>          | STANDARD                                                                            | <b>Sweep Width (Hz)</b>      | 24037.73             | <b>Temperature (degree C)</b> 25.152   |

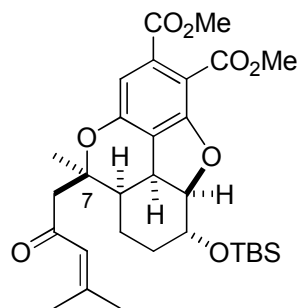

**C-7-*epi*-6b**

<sup>13</sup>CNMR (100 MHz) in CDCl<sub>3</sub>

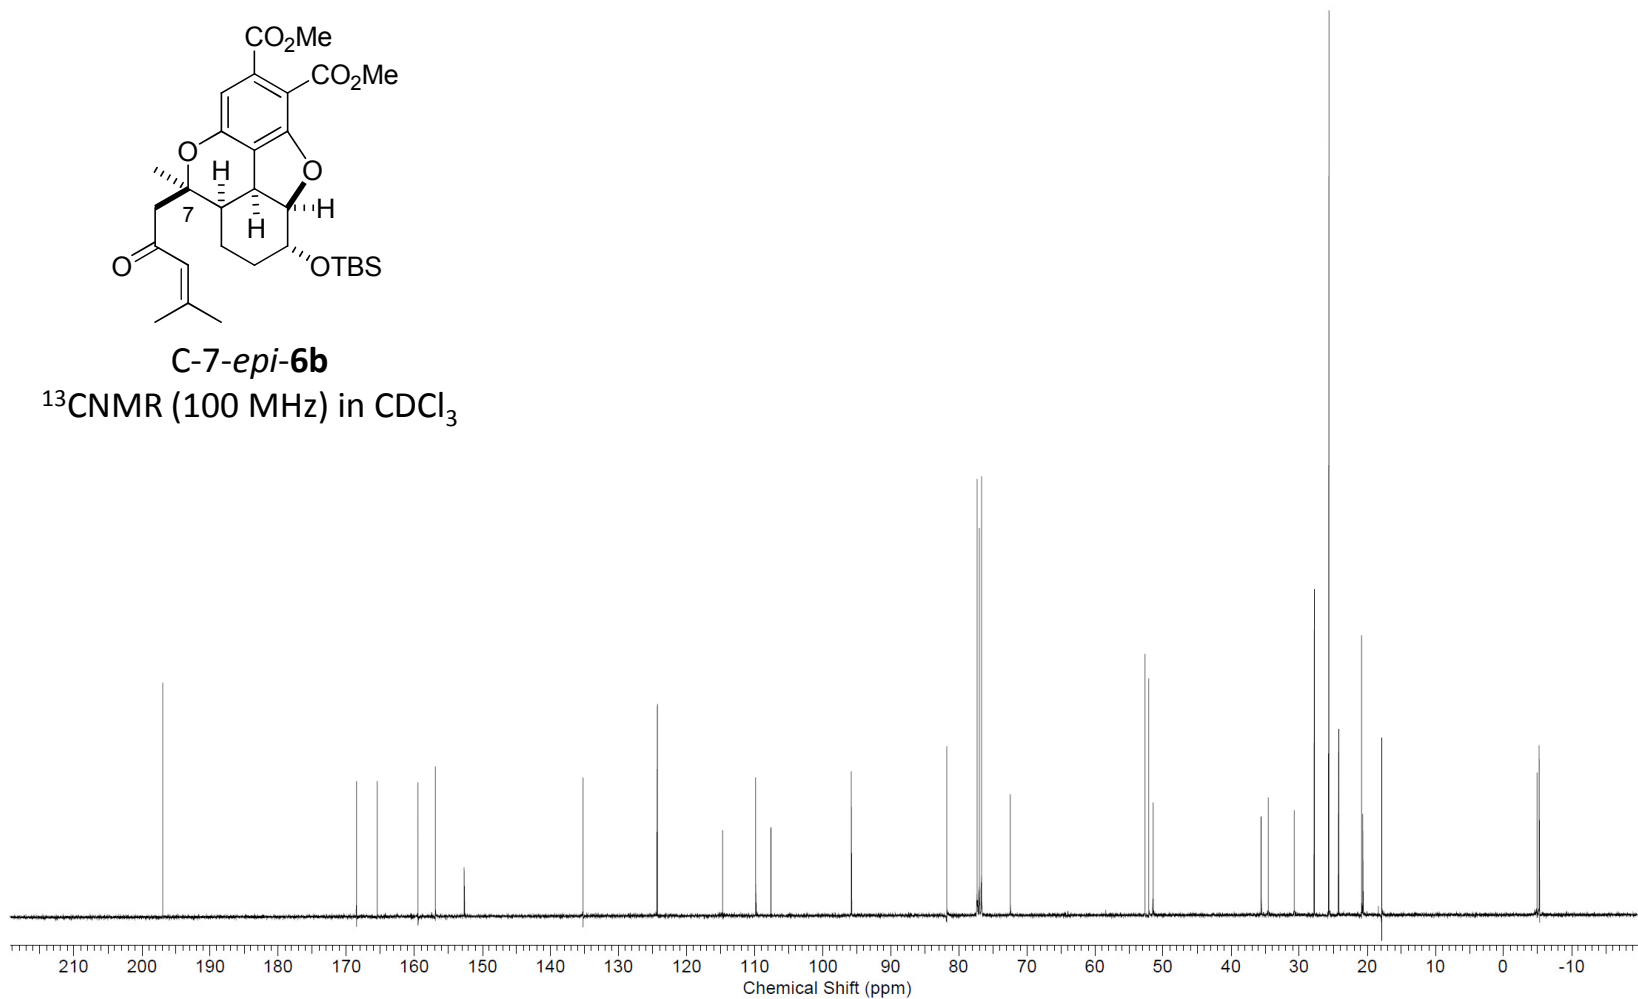



|                        |                                                                                                                     |                |                   |                      |             |                        |              |
|------------------------|---------------------------------------------------------------------------------------------------------------------|----------------|-------------------|----------------------|-------------|------------------------|--------------|
| Acquisition Time (sec) | 2.5559                                                                                                              | Comment        | 00701217-E239-363 | Date                 | Jul 31 2012 | Date Stamp             | Jul 31 2012  |
| File Name              | C:\DOCUME~1\AMENDC01\LOCALS~1\TEMP\GAINS19712.TMP\PRODUCTION\UNITY\AMENDC01\00701217-E239-363_2012213110542.FID\FID |                |                   |                      |             |                        |              |
| Frequency (MHz)        | 400.20                                                                                                              | Nucleus        | 1H                | Number of Transients | 64          | Original Points Count  | 16384        |
| Points Count           | 16384                                                                                                               | Pulse Sequence | NOESY1D           | Receiver Gain        | 30.00       | Solvent                | CHLOROFORM-d |
| Spectrum Offset (Hz)   | 2401.1633                                                                                                           | Spectrum Type  | STANDARD          | Sweep Width (Hz)     | 6410.26     | Temperature (degree C) | 25.000       |

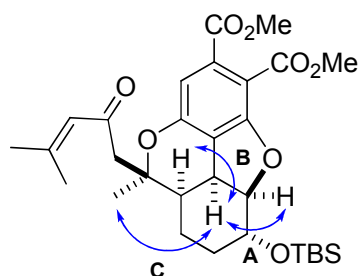

**C-7-*epi*-6b**  
NOE 3.63 ppm

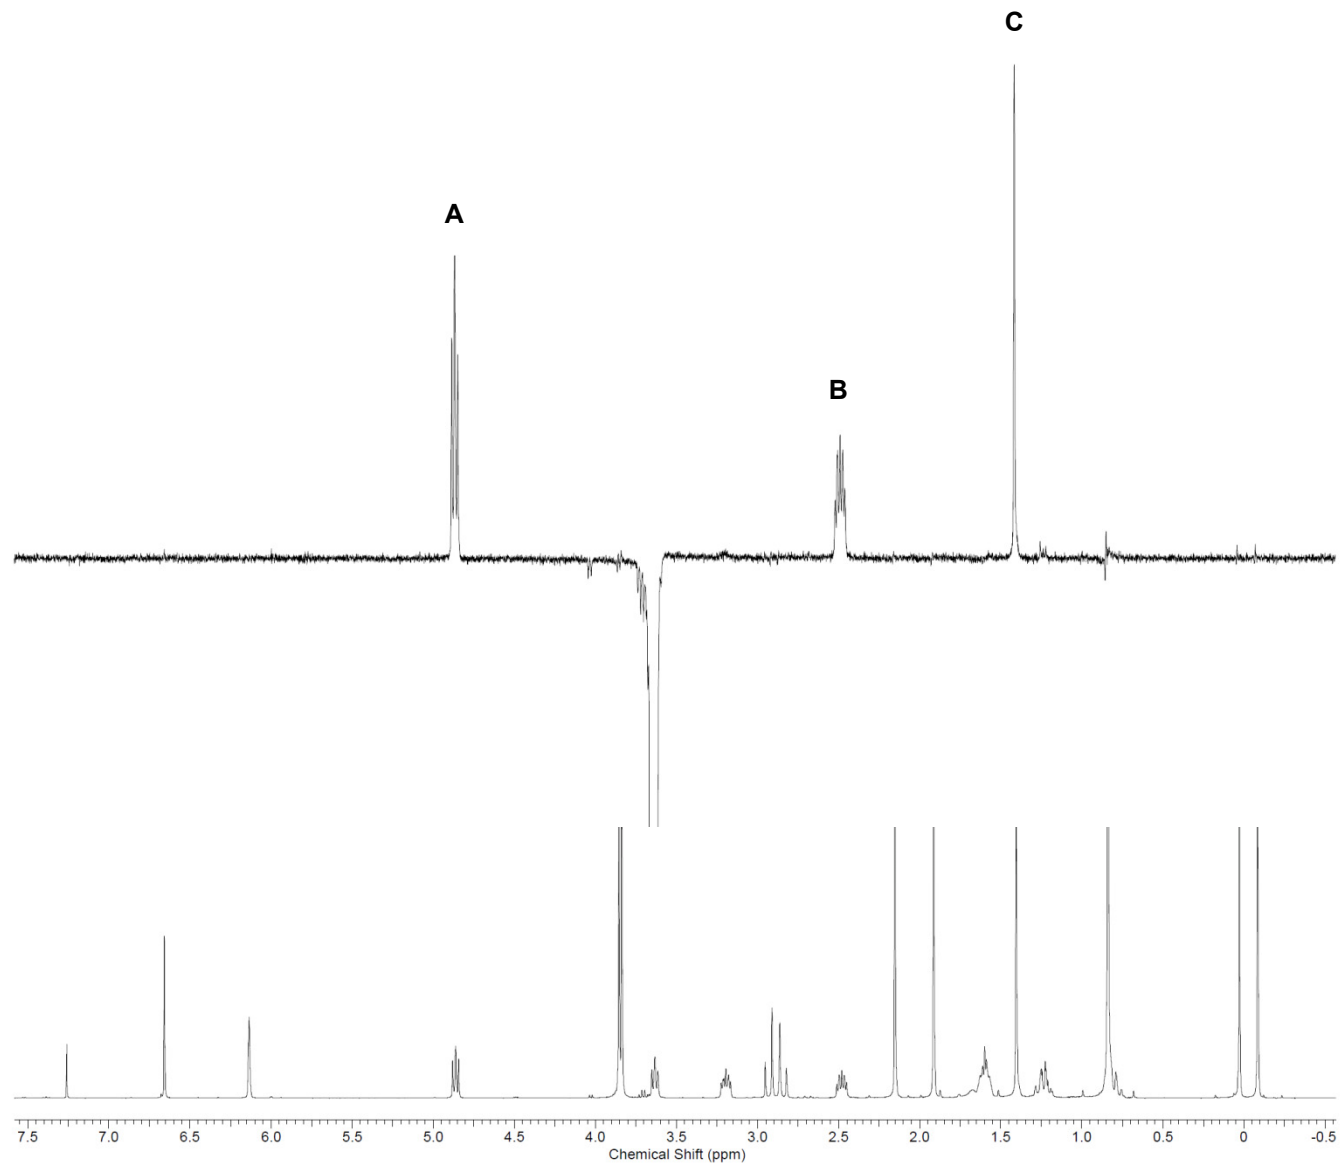

|                               |             |                       |                                                                                        |                             |             |                               |              |
|-------------------------------|-------------|-----------------------|----------------------------------------------------------------------------------------|-----------------------------|-------------|-------------------------------|--------------|
| <b>Acquisition Time (sec)</b> | 5.1118      | <b>Comment</b>        | 00701217-F53-long                                                                      |                             | <b>Date</b> | Sep 17 2012                   |              |
| <b>Date Stamp</b>             | Sep 17 2012 | <b>File Name</b>      | \\UNITYH.PFIZER.COM\AUTO\2012\20120917\00701217-F53-LONG_20120917_01\PROTON_01.FID\FID |                             |             |                               |              |
| <b>Frequency (MHz)</b>        | 400.20      | <b>Nucleus</b>        | 1H                                                                                     | <b>Number of Transients</b> | 80          | <b>Original Points Count</b>  | 32768        |
| <b>Points Count</b>           | 32768       | <b>Pulse Sequence</b> | s2pul                                                                                  | <b>Receiver Gain</b>        | 30.00       | <b>Solvent</b>                | CHLOROFORM-d |
| <b>Spectrum Offset (Hz)</b>   | 2401.1633   | <b>Spectrum Type</b>  | STANDARD                                                                               | <b>Sweep Width (Hz)</b>     | 6410.26     | <b>Temperature (degree C)</b> | 25.000       |

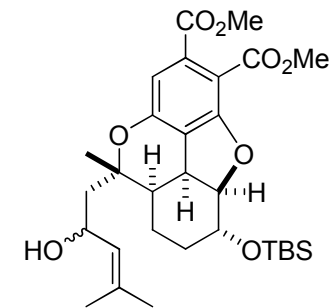

**S7**

(crude NMR)

<sup>1</sup>H NMR (400 MHz) in CDCl<sub>3</sub>

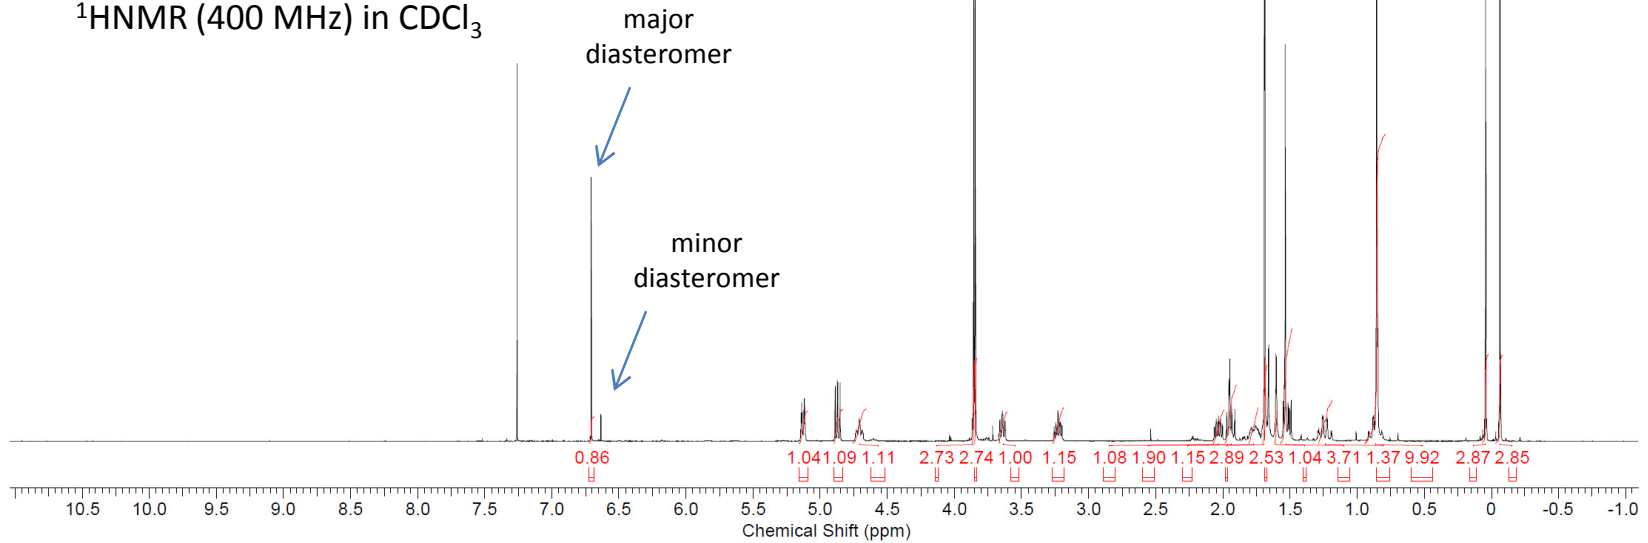

|                               |                                                                                    |                             |               |                               |              |                   |             |
|-------------------------------|------------------------------------------------------------------------------------|-----------------------------|---------------|-------------------------------|--------------|-------------------|-------------|
| <b>Acquisition Time (sec)</b> | 5.1118                                                                             | <b>Comment</b>              | 00701217-E-83 | <b>Date</b>                   | Sep 28 2011  | <b>Date Stamp</b> | Sep 28 2011 |
| <b>File Name</b>              | \\UNITYH.PFIZER.COM\AUTO\2011\20110928\00701217-E-83_20110928_01\PROTON_01.FID\FID |                             |               | <b>Frequency (MHz)</b>        | 400.20       |                   |             |
| <b>Nucleus</b>                | 1H                                                                                 | <b>Number of Transients</b> | 192           | <b>Original Points Count</b>  | 32768        |                   |             |
| <b>Pulse Sequence</b>         | s2pul                                                                              | <b>Receiver Gain</b>        | 30.00         | <b>Solvent</b>                | CHLOROFORM-d |                   |             |
| <b>Spectrum Offset (Hz)</b>   | 2401.6167                                                                          | <b>Spectrum Type</b>        | STANDARD      | <b>Sweep Width (Hz)</b>       | 6410.26      |                   |             |
|                               |                                                                                    |                             |               | <b>Temperature (degree C)</b> | 25.000       |                   |             |

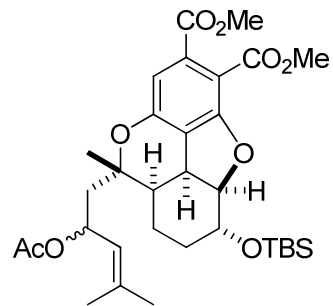

**14**

(crude NMR)

<sup>1</sup>HNMR (400 MHz) in CDCl<sub>3</sub>

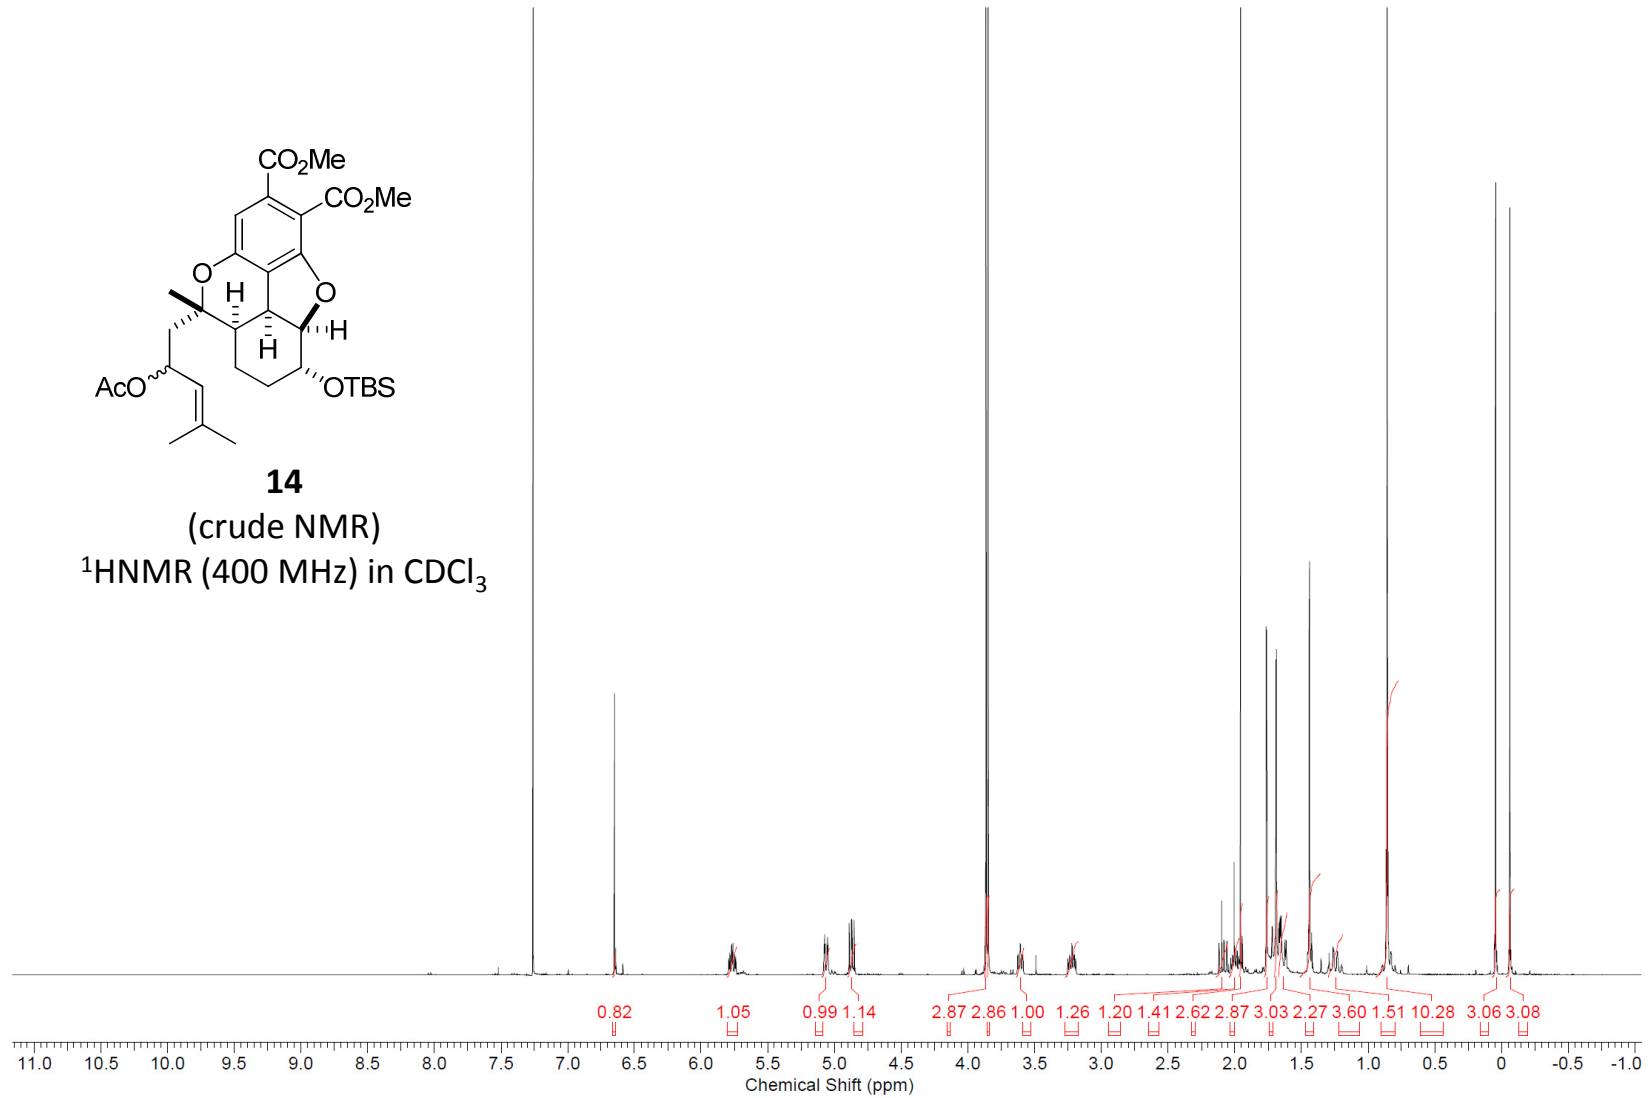

|                               |            |                             |                                               |                               |              |
|-------------------------------|------------|-----------------------------|-----------------------------------------------|-------------------------------|--------------|
| <b>Acquisition Time (sec)</b> | 3.6841     | <b>Comment</b>              | 00701217-E91-pure                             | <b>Date</b>                   | Oct 1 2011   |
| <b>Date Stamp</b>             | Oct 1 2011 | <b>File Name</b>            | \\UNITYG.PFIZER.COM\SAMBA\111001\0201.FID\FID | <b>Frequency (MHz)</b>        | 399.54       |
| <b>Nucleus</b>                | 1H         | <b>Number of Transients</b> | 16                                            | <b>Original Points Count</b>  | 23552        |
| <b>Pulse Sequence</b>         | s2pul      | <b>Receiver Gain</b>        | 26.00                                         | <b>Solvent</b>                | CHLOROFORM-d |
| <b>Spectrum Offset (Hz)</b>   | 2401.5022  | <b>Spectrum Type</b>        | STANDARD                                      | <b>Sweep Width (Hz)</b>       | 6392.84      |
|                               |            |                             |                                               | <b>Points Count</b>           | 32768        |
|                               |            |                             |                                               | <b>Temperature (degree C)</b> | 25.000       |

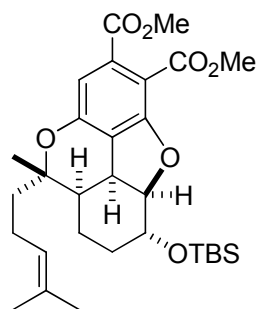

**16**

<sup>1</sup>HNMR (400 MHz) in CDCl<sub>3</sub>

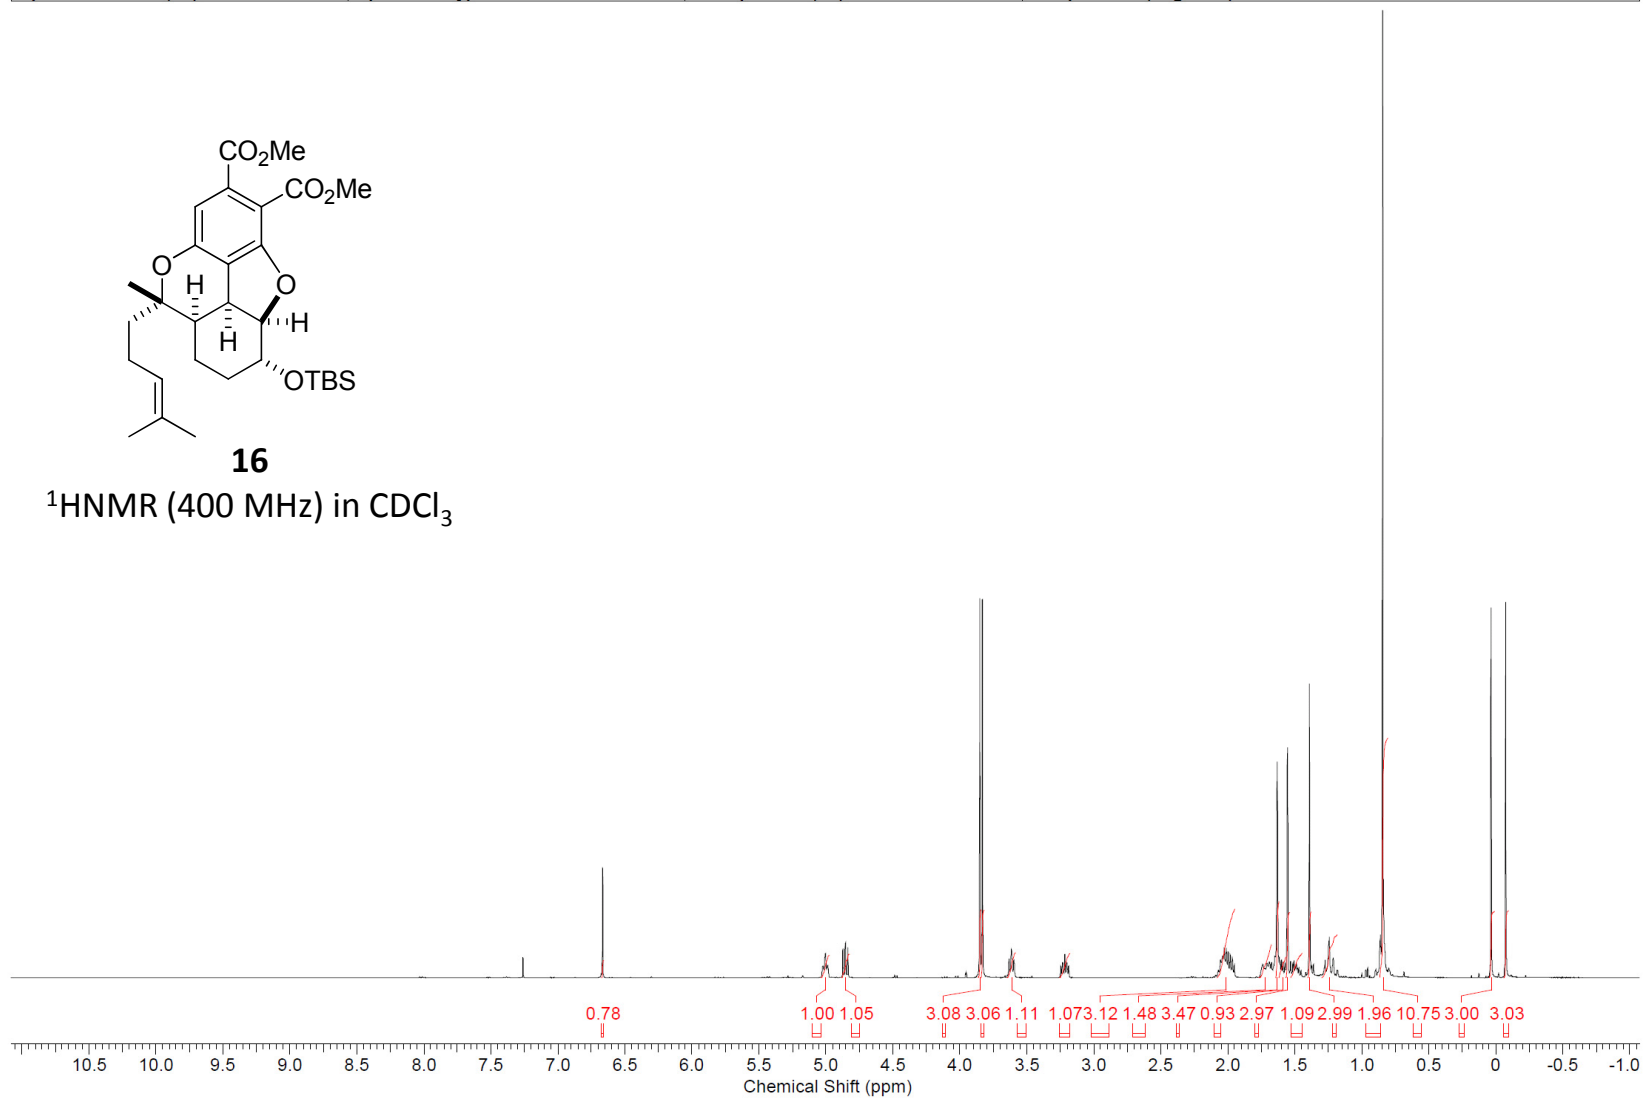

|                               |            |                       |                                                                                        |                             |             |                               |              |
|-------------------------------|------------|-----------------------|----------------------------------------------------------------------------------------|-----------------------------|-------------|-------------------------------|--------------|
| <b>Acquisition Time (sec)</b> | 1.4680     | <b>Comment</b>        | 00701217-E91-pure                                                                      |                             | <b>Date</b> | Oct 1 2011                    |              |
| <b>Date Stamp</b>             | Oct 1 2011 | <b>File Name</b>      | \\UNITYH.PFIZER.COM\AUTO\2011\20111001\00701217-E91-PURE_20111001_01\CARBON_01.FID\FID |                             |             |                               |              |
| <b>Frequency (MHz)</b>        | 100.64     | <b>Nucleus</b>        | 13C                                                                                    | <b>Number of Transients</b> | 512         | <b>Original Points Count</b>  | 32768        |
| <b>Points Count</b>           | 32768      | <b>Pulse Sequence</b> | s2pul                                                                                  | <b>Receiver Gain</b>        | 40.00       | <b>Solvent</b>                | CHLOROFORM-d |
| <b>Spectrum Offset (Hz)</b>   | 10555.1309 | <b>Spectrum Type</b>  | STANDARD                                                                               | <b>Sweep Width (Hz)</b>     | 22321.43    | <b>Temperature (degree C)</b> | 25.000       |

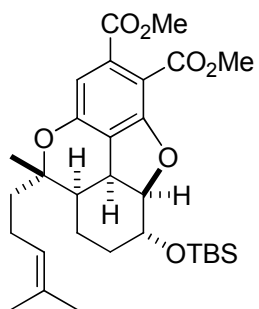

**16**

<sup>13</sup>CNMR (100 MHz) in CDCl<sub>3</sub>

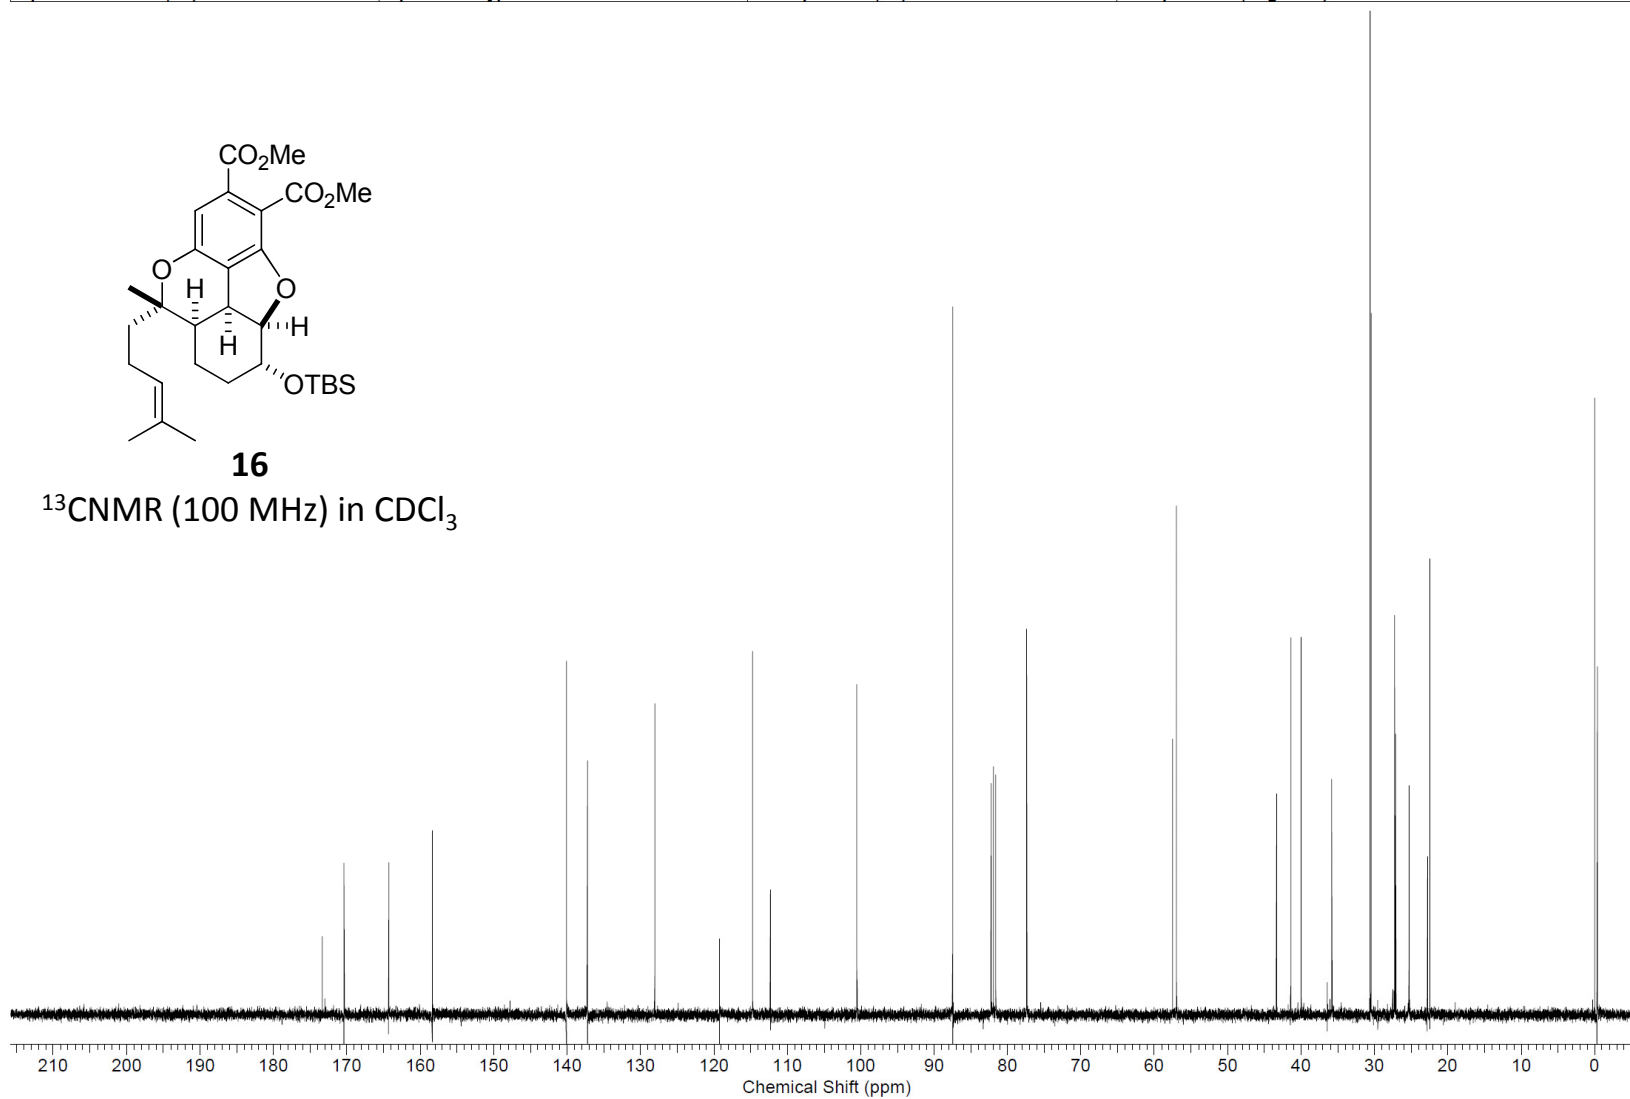

|                               |                                                                                   |                              |                      |                               |              |
|-------------------------------|-----------------------------------------------------------------------------------|------------------------------|----------------------|-------------------------------|--------------|
| <b>Acquisition Time (sec)</b> | 2.5625                                                                            | <b>Comment</b>               |                      |                               |              |
| <b>Date</b>                   | 09 Jul 2012 19:04:32                                                              | <b>Date Stamp</b>            | 09 Jul 2012 19:04:32 |                               |              |
| <b>File Name</b>              | \\AMRGROB10025582.AMER.PFIZER.COM\BKDATA\DATA\AMENDC01\NMR\00701217-E97-NOE\2\FID |                              |                      |                               |              |
| <b>Frequency (MHz)</b>        | 399.54                                                                            | <b>Nucleus</b>               | 1H                   | <b>Number of Transients</b>   | 16           |
| <b>Origin</b>                 | spect                                                                             | <b>Original Points Count</b> | 16384                | <b>Owner</b>                  | FCNGRO-BRKOA |
| <b>Points Count</b>           | 16384                                                                             | <b>Pulse Sequence</b>        | zg30                 | <b>Receiver Gain</b>          | 203.00       |
| <b>SW(cyclical) (Hz)</b>      | 6393.86                                                                           | <b>Solvent</b>               | CHLOROFORM-d         | <b>Spectrum Offset (Hz)</b>   | 2384.5544    |
| <b>Spectrum Type</b>          | STANDARD                                                                          | <b>Sweep Width (Hz)</b>      | 6393.47              | <b>Temperature (degree C)</b> | 25.146       |

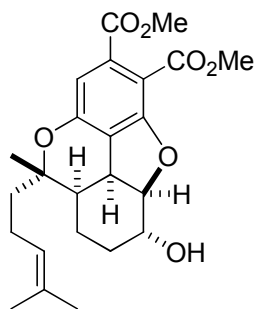

**S8**

<sup>1</sup>HNMR (400 MHz) in CDCl<sub>3</sub>

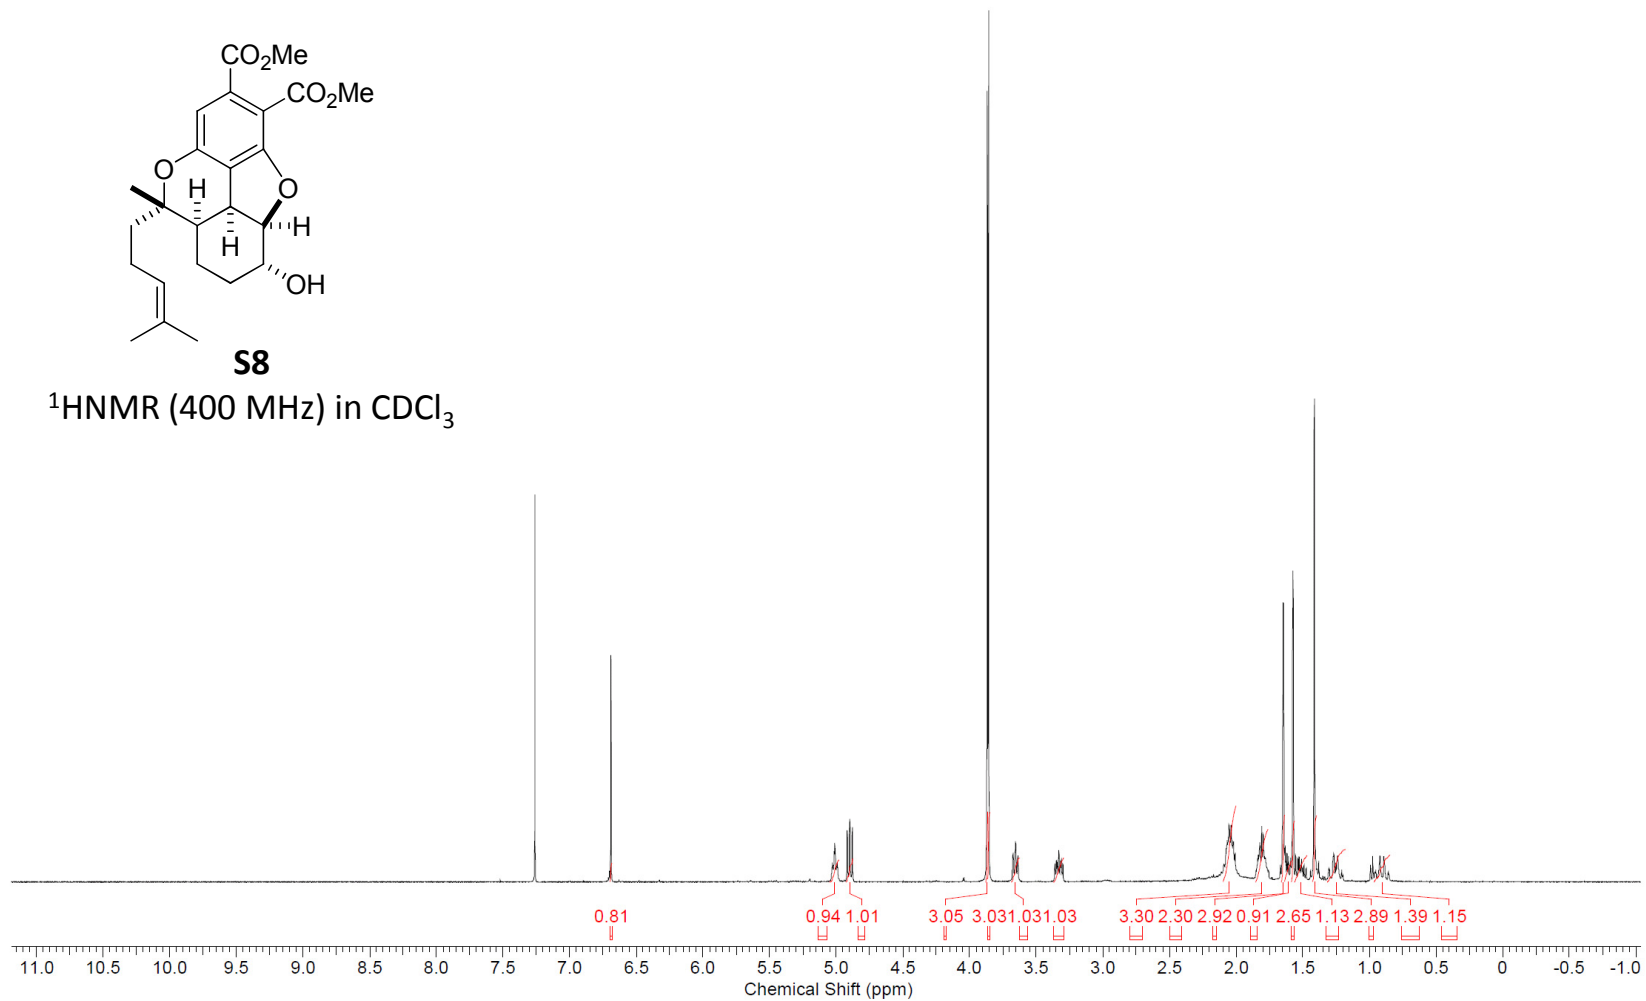

|                               |                                                                                   |                               |                      |
|-------------------------------|-----------------------------------------------------------------------------------|-------------------------------|----------------------|
| <b>Acquisition Time (sec)</b> | 1.3631                                                                            | <b>Comment</b>                |                      |
| <b>Date</b>                   | 09 Jul 2012 20:27:44                                                              | <b>Date Stamp</b>             | 09 Jul 2012 20:27:44 |
| <b>File Name</b>              | \\AMRGROB10025582.AMER.PFIZER.COM\BKDATA:DATA\AMENDC01\NMR\00701217-E97-NOE\3\FID |                               |                      |
| <b>Frequency (MHz)</b>        | 100.46                                                                            | <b>Nucleus</b>                | <sup>13</sup> C      |
| <b>Origin</b>                 | spect                                                                             | <b>Number of Transients</b>   | 2048                 |
| <b>Points Count</b>           | 32768                                                                             | <b>Original Points Count</b>  | 32768                |
| <b>SW(cyclical) (Hz)</b>      | 24038.46                                                                          | <b>Pulse Sequence</b>         | zgpg30               |
| <b>Spectrum Type</b>          | STANDARD                                                                          | <b>Solvent</b>                | CHLOROFORM-d         |
|                               |                                                                                   | <b>Spectrum Offset (Hz)</b>   | 10048.4209           |
|                               |                                                                                   | <b>Sweep Width (Hz)</b>       | 24037.73             |
|                               |                                                                                   | <b>Temperature (degree C)</b> | 25.149               |



**S8**

<sup>13</sup>CNMR (100 MHz) in CDCl<sub>3</sub>

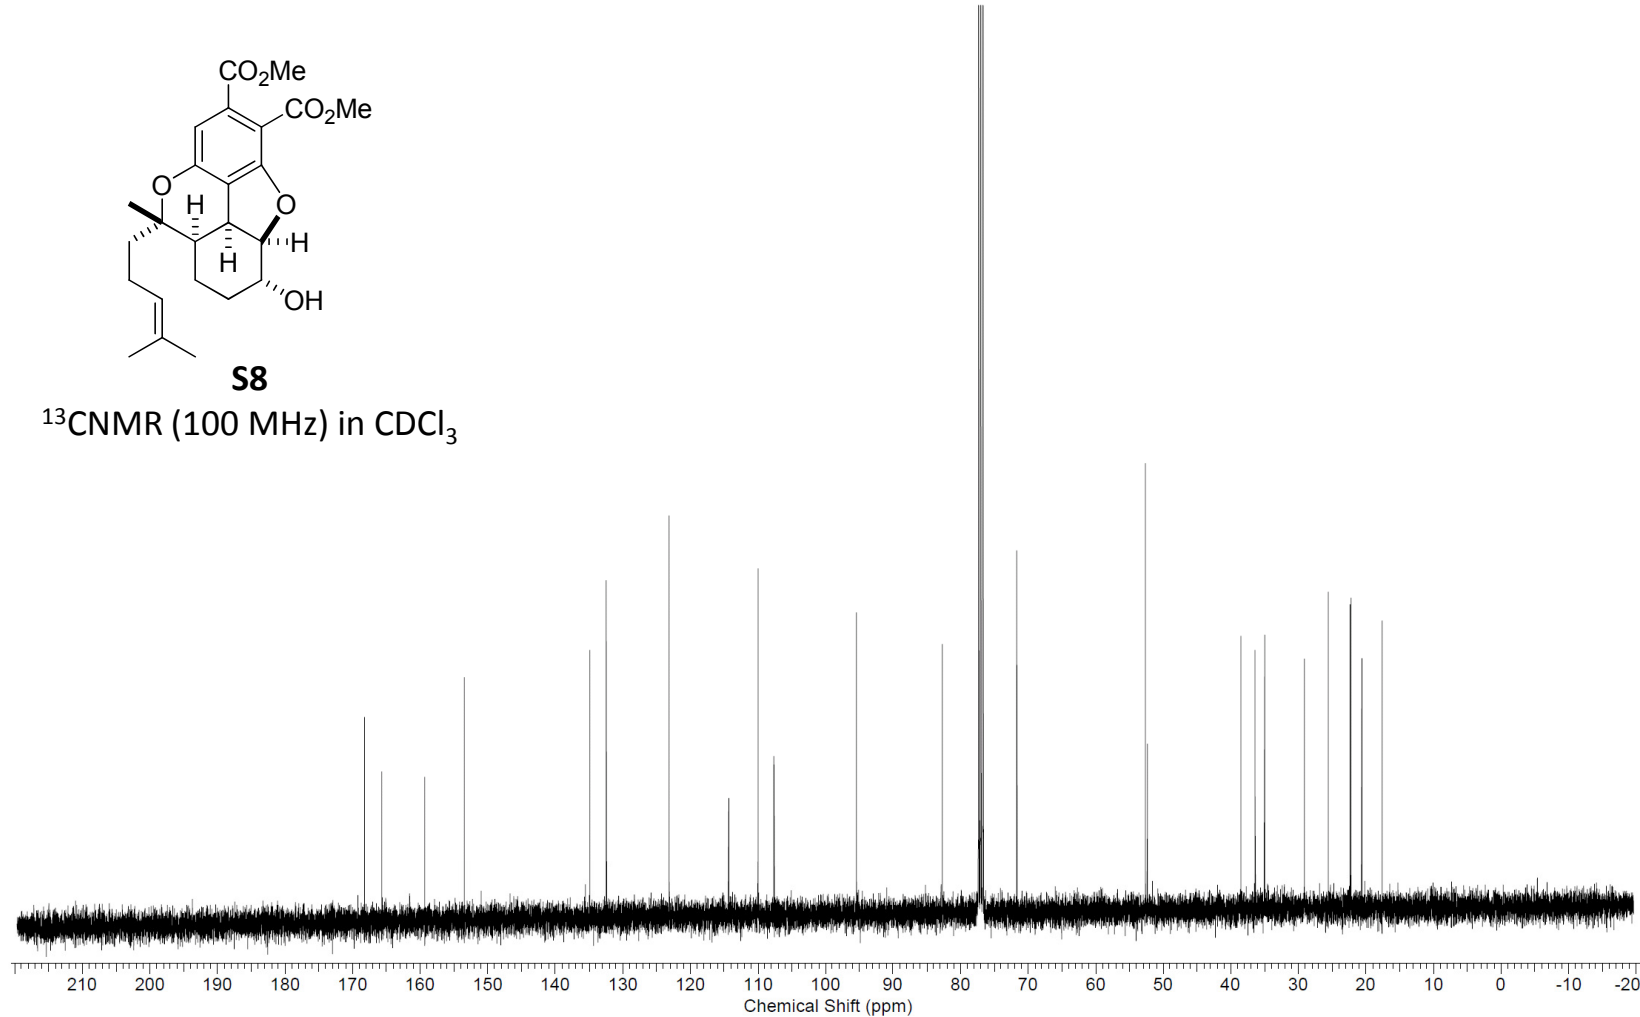

|                        |             |                      |                                               |                       |                 |                        |        |
|------------------------|-------------|----------------------|-----------------------------------------------|-----------------------|-----------------|------------------------|--------|
| Acquisition Time (sec) | 3.6841      | Comment              | 00701217-E109-pure                            |                       | Date            | Oct 20 2011            |        |
| Date Stamp             | Oct 20 2011 | File Name            | \\UNITYG.PFIZER.COM\SAMBA\111020\0201.FID\FID |                       | Frequency (MHz) | 399.54                 |        |
| Nucleus                | 1H          | Number of Transients | 16                                            | Original Points Count | 23552           | Points Count           | 32768  |
| Pulse Sequence         | s2pul       | Receiver Gain        | 36.00                                         | Solvent               | CHLOROFORM-d    |                        |        |
| Spectrum Offset (Hz)   | 2397.1536   | Spectrum Type        | STANDARD                                      | Sweep Width (Hz)      | 6392.84         | Temperature (degree C) | 25.000 |

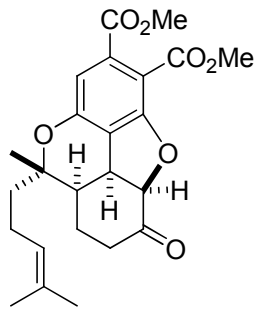

**17**

<sup>1</sup>HNMR (400 MHz) in CDCl<sub>3</sub>

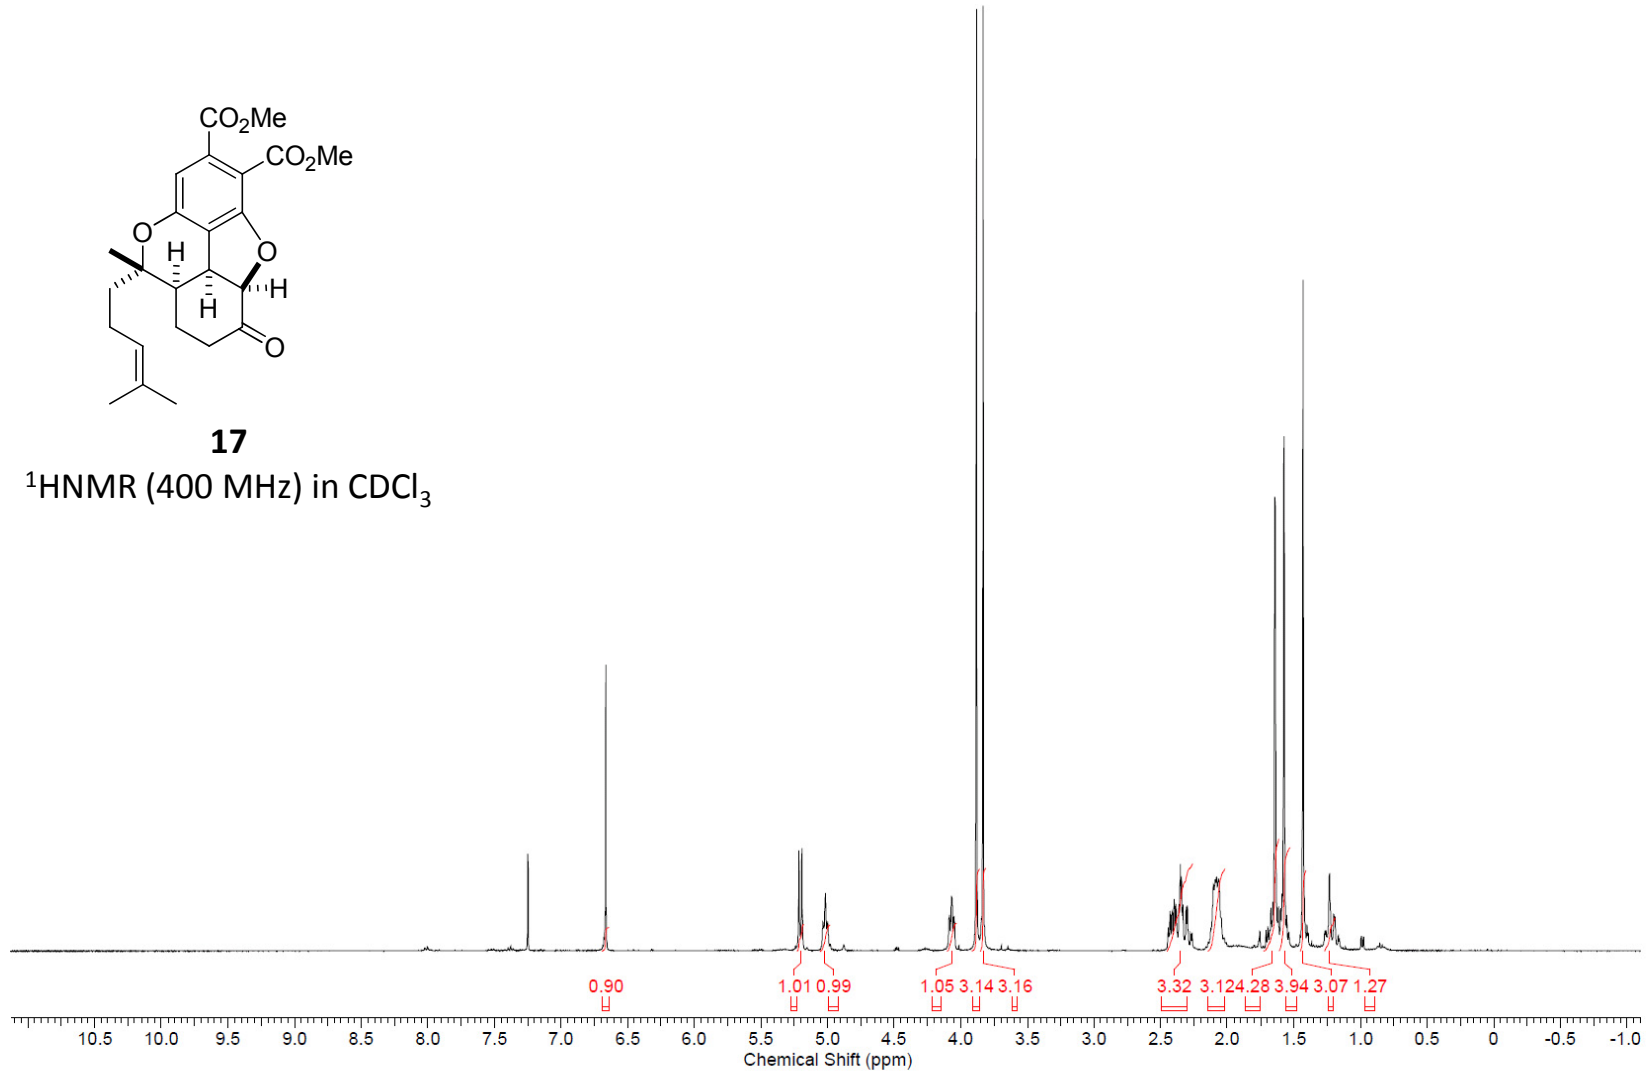



|                               |             |                             |                                                         |                               |              |
|-------------------------------|-------------|-----------------------------|---------------------------------------------------------|-------------------------------|--------------|
| <b>Acquisition Time (sec)</b> | 1.3591      | <b>Comment</b>              | 00701217-E109-pure   Quick C-13 for concentrated sample | <b>Date</b>                   | Oct 20 2011  |
| <b>Date Stamp</b>             | Oct 20 2011 | <b>File Name</b>            | \\UNITYG.PFIZER.COM\SAMBA\111020\0202.FID\FID           | <b>Frequency (MHz)</b>        | 100.47       |
| <b>Nucleus</b>                | 13C         | <b>Number of Transients</b> | 256                                                     | <b>Original Points Count</b>  | 32768        |
| <b>Pulse Sequence</b>         | s2pul       | <b>Receiver Gain</b>        | 60.00                                                   | <b>Solvent</b>                | CHLOROFORM-d |
| <b>Spectrum Offset (Hz)</b>   | 10046.3643  | <b>Spectrum Type</b>        | STANDARD                                                | <b>Sweep Width (Hz)</b>       | 24110.91     |
|                               |             |                             |                                                         | <b>Temperature (degree C)</b> | 25.000       |

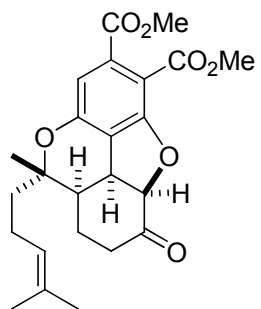

**17**

<sup>13</sup>CNMR (100 MHz) in CDCl<sub>3</sub>

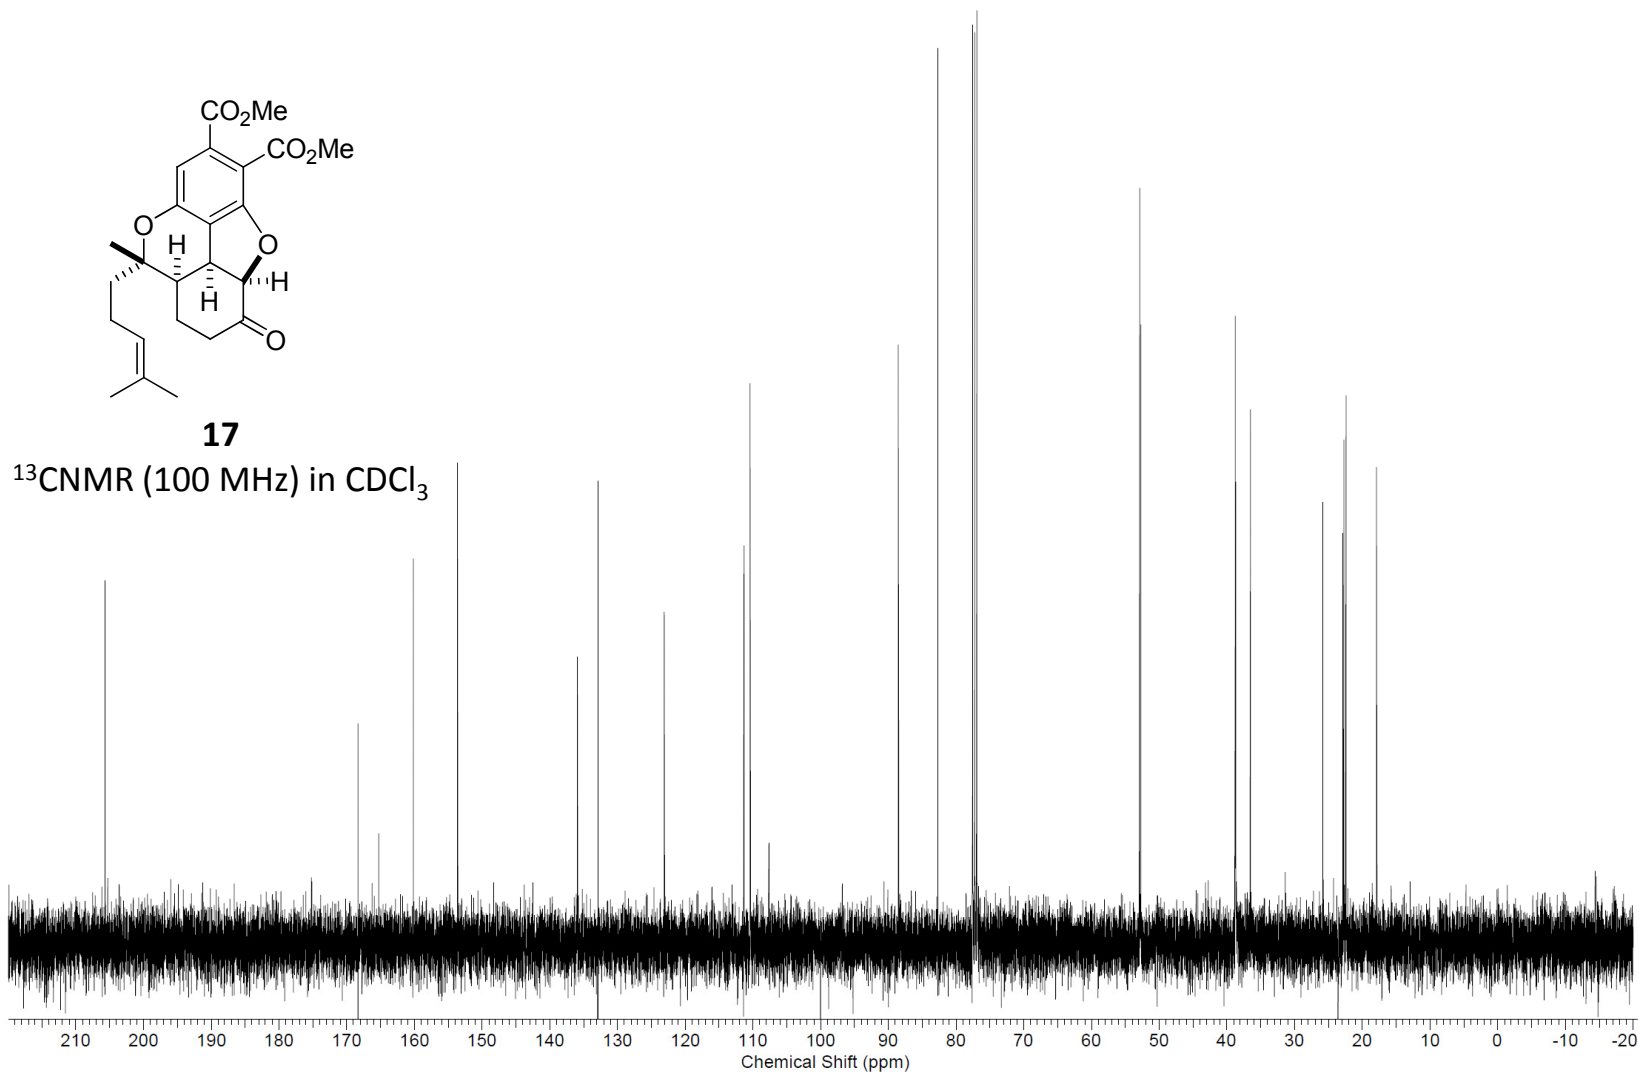

|                               |                                                                                  |                              |                      |                               |             |
|-------------------------------|----------------------------------------------------------------------------------|------------------------------|----------------------|-------------------------------|-------------|
| <b>Acquisition Time (sec)</b> | 2.5625                                                                           | <b>Comment</b>               |                      |                               |             |
| <b>Date</b>                   | 12 Jul 2012 13:44:32                                                             | <b>Date Stamp</b>            | 12 Jul 2012 13:44:32 |                               |             |
| <b>File Name</b>              | \\AMRGROB10025582.AMER.PFIZER.COM\BKDATA\DATA\AMENDC01\NMR\00701217-E281-3\2\FID |                              |                      |                               |             |
| <b>Frequency (MHz)</b>        | 399.54                                                                           | <b>Nucleus</b>               | 1H                   | <b>Number of Transients</b>   | 16          |
| <b>Origin</b>                 | spect                                                                            | <b>Original Points Count</b> | 16384                | <b>Owner</b>                  | FCNGRO-BRKO |
| <b>Points Count</b>           | 16384                                                                            | <b>Pulse Sequence</b>        | zg30                 | <b>Receiver Gain</b>          | 256.00      |
| <b>SW(cyclical) (Hz)</b>      | 6393.86                                                                          | <b>Solvent</b>               | CHLOROFORM-d         | <b>Spectrum Offset (Hz)</b>   | 2384.5544   |
| <b>Spectrum Type</b>          | STANDARD                                                                         | <b>Sweep Width (Hz)</b>      | 6393.47              | <b>Temperature (degree C)</b> | 25.152      |

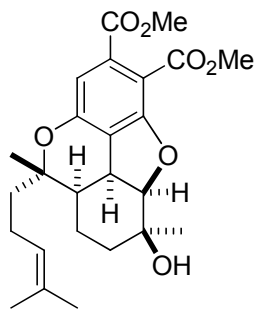

5

<sup>1</sup>HNMR (400 MHz) in CDCl<sub>3</sub>

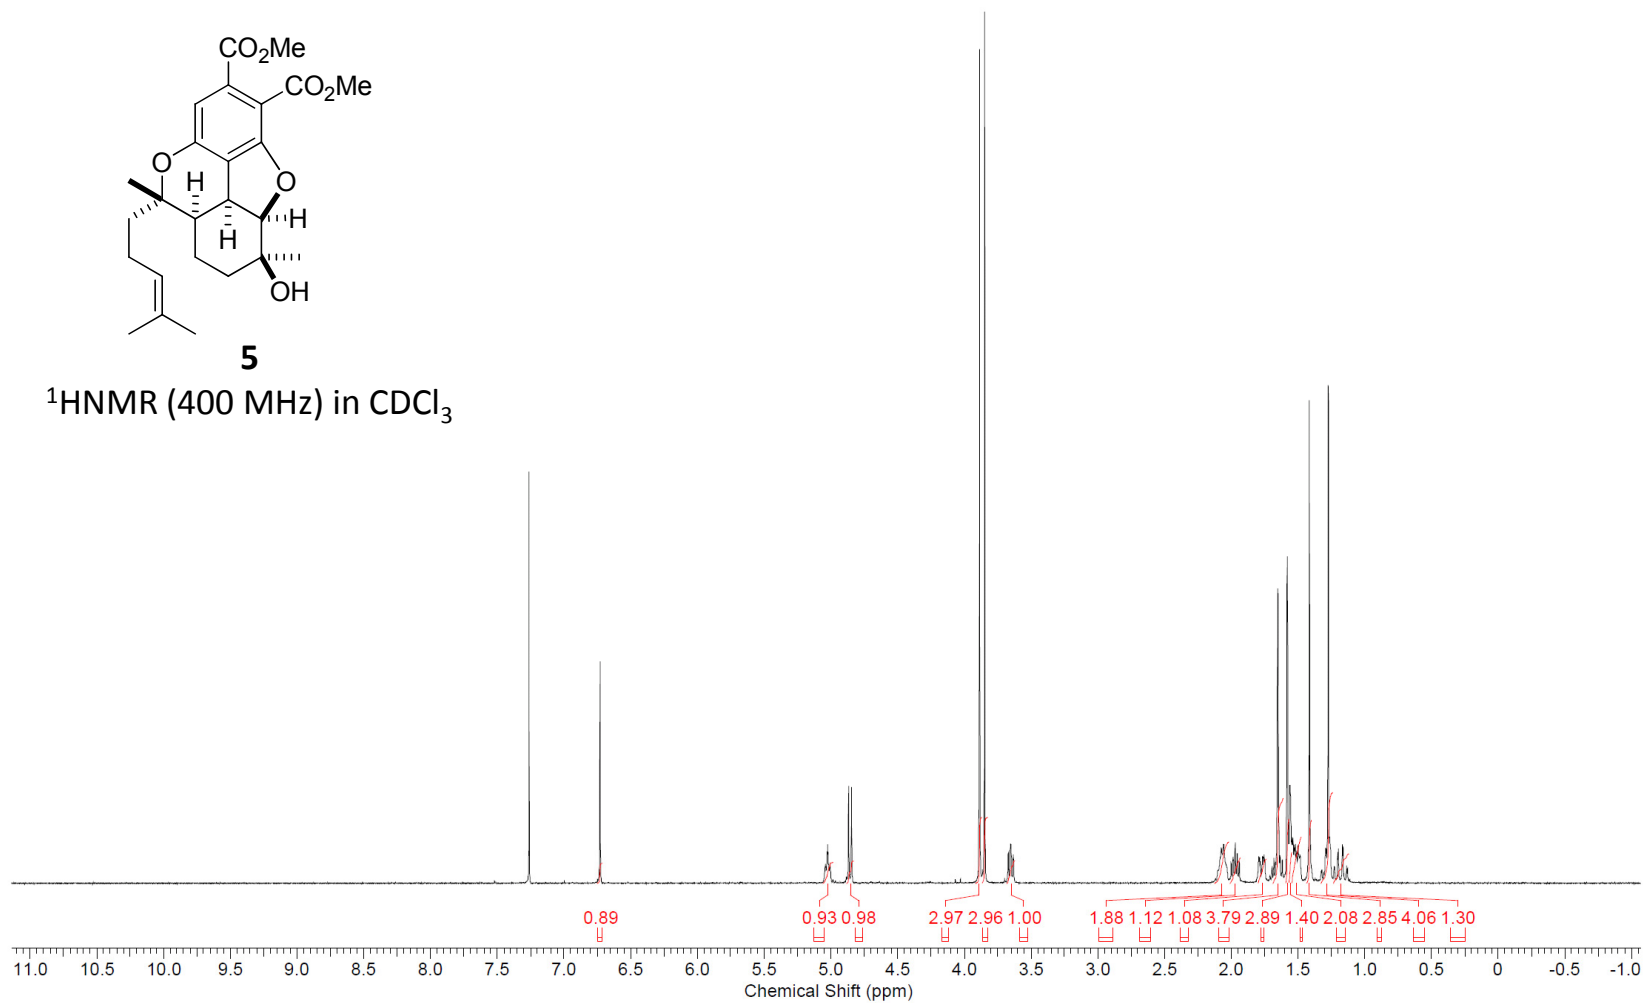

|                               |                                                                                    |                              |                      |                               |               |
|-------------------------------|------------------------------------------------------------------------------------|------------------------------|----------------------|-------------------------------|---------------|
| <b>Acquisition Time (sec)</b> | 1.3631                                                                             | <b>Comment</b>               |                      |                               |               |
| <b>Date</b>                   | 07 Jul 2012 17:17:52                                                               | <b>Date Stamp</b>            | 07 Jul 2012 17:17:52 |                               |               |
| <b>File Name</b>              | \\AMRGROB10025582.AMER.PFIZER.COM\BKDATA:DATA\AMENDC01\NMR\00701217-E281-NOE\3\FID |                              |                      |                               |               |
| <b>Frequency (MHz)</b>        | 100.46                                                                             | <b>Nucleus</b>               | 13C                  | <b>Number of Transients</b>   | 2048          |
| <b>Origin</b>                 | spect                                                                              | <b>Original Points Count</b> | 32768                | <b>Owner</b>                  | FCNGRO-BRKO A |
| <b>Points Count</b>           | 32768                                                                              | <b>Pulse Sequence</b>        | zgpg30               | <b>Receiver Gain</b>          | 144.00        |
| <b>SW(cyclical) (Hz)</b>      | 24038.46                                                                           | <b>Solvent</b>               | CHLOROFORM-d         | <b>Spectrum Offset (Hz)</b>   | 10047.6865    |
| <b>Spectrum Type</b>          | STANDARD                                                                           | <b>Sweep Width (Hz)</b>      | 24037.73             | <b>Temperature (degree C)</b> | 25.149        |



5

<sup>13</sup>CNMR (100 MHz) in CDCl<sub>3</sub>

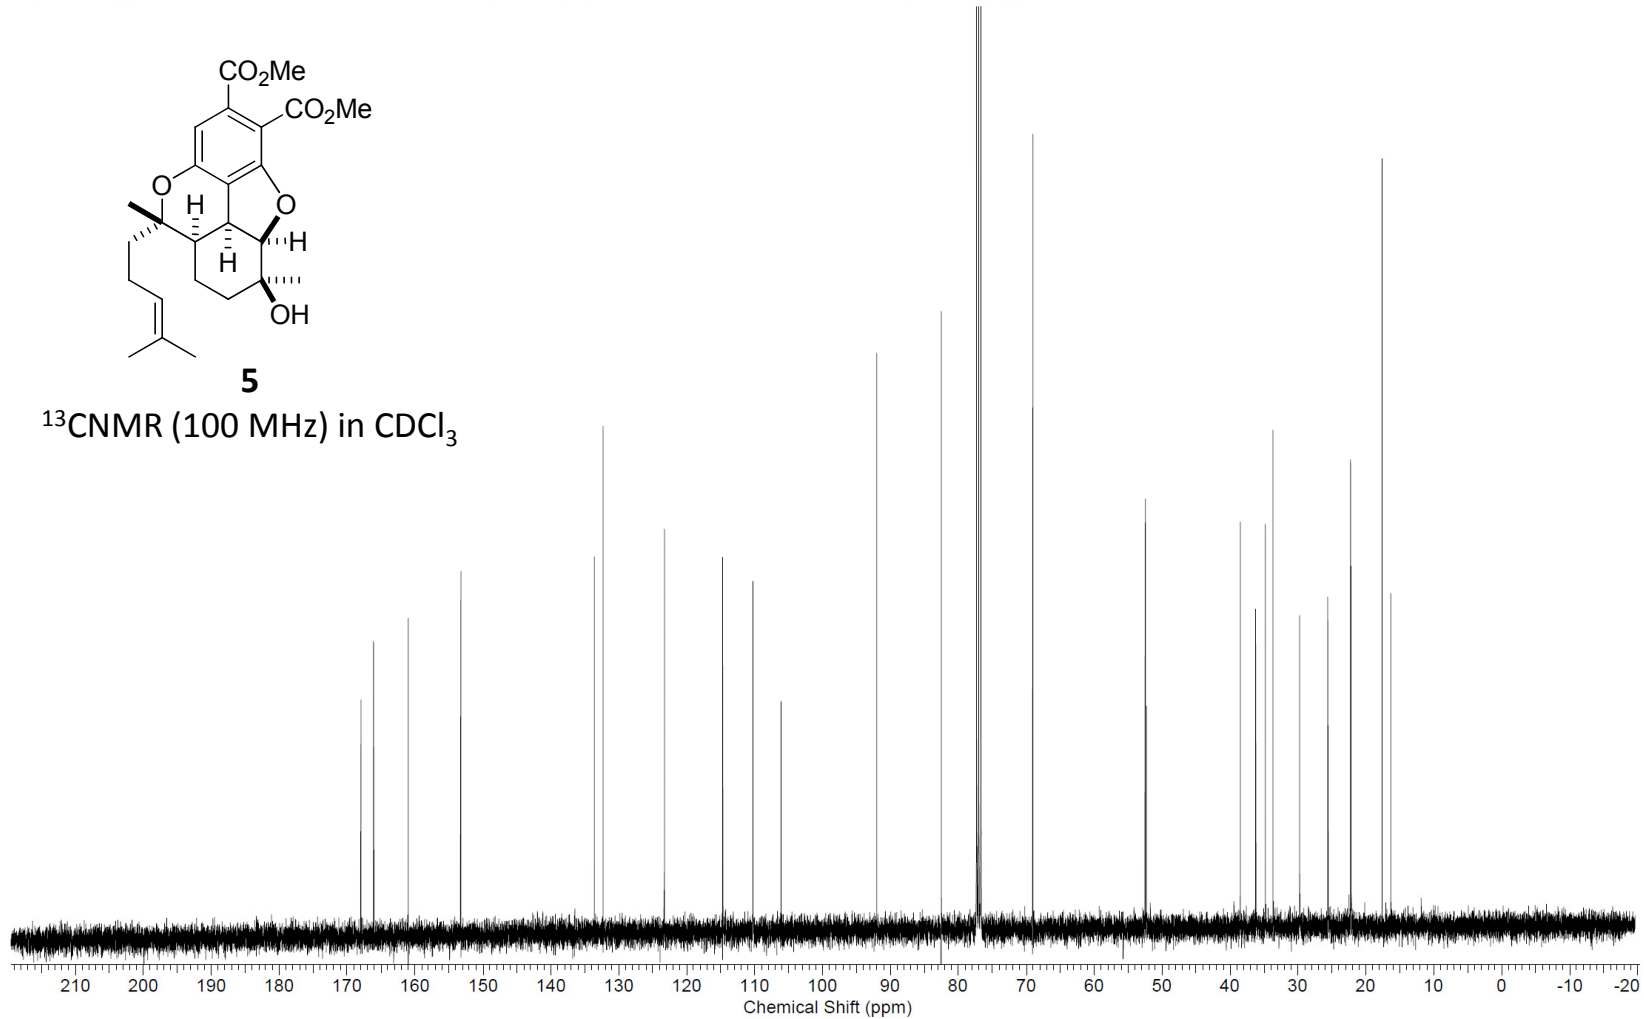

|                        |                                                                                                                    |                |                   |                      |            |                        |              |
|------------------------|--------------------------------------------------------------------------------------------------------------------|----------------|-------------------|----------------------|------------|------------------------|--------------|
| Acquisition Time (sec) | 2.5559                                                                                                             | Comment        | 00701217-E281-485 | Date                 | Jul 8 2012 | Date Stamp             | Jul 8 2012   |
| File Name              | C:\DOCUME~1\AMENDC01\LOCALS~1\TEMP\GAINS9193.TMP\PRODUCTION\UNITY\AMENDC01\00701217-E281-485_2012190115707.FID\FID |                |                   |                      |            |                        |              |
| Frequency (MHz)        | 400.20                                                                                                             | Nucleus        | 1H                | Number of Transients | 64         | Original Points Count  | 16384        |
| Points Count           | 16384                                                                                                              | Pulse Sequence | NOESY1D           | Receiver Gain        | 30.00      | Solvent                | CHLOROFORM-d |
| Spectrum Offset (Hz)   | 2401.1633                                                                                                          | Spectrum Type  | STANDARD          | Sweep Width (Hz)     | 6410.26    | Temperature (degree C) | 25.000       |

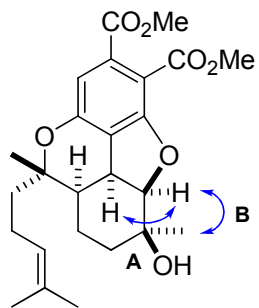

**5**  
NOE 4.85 ppm

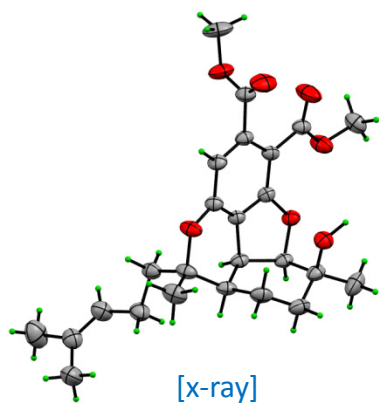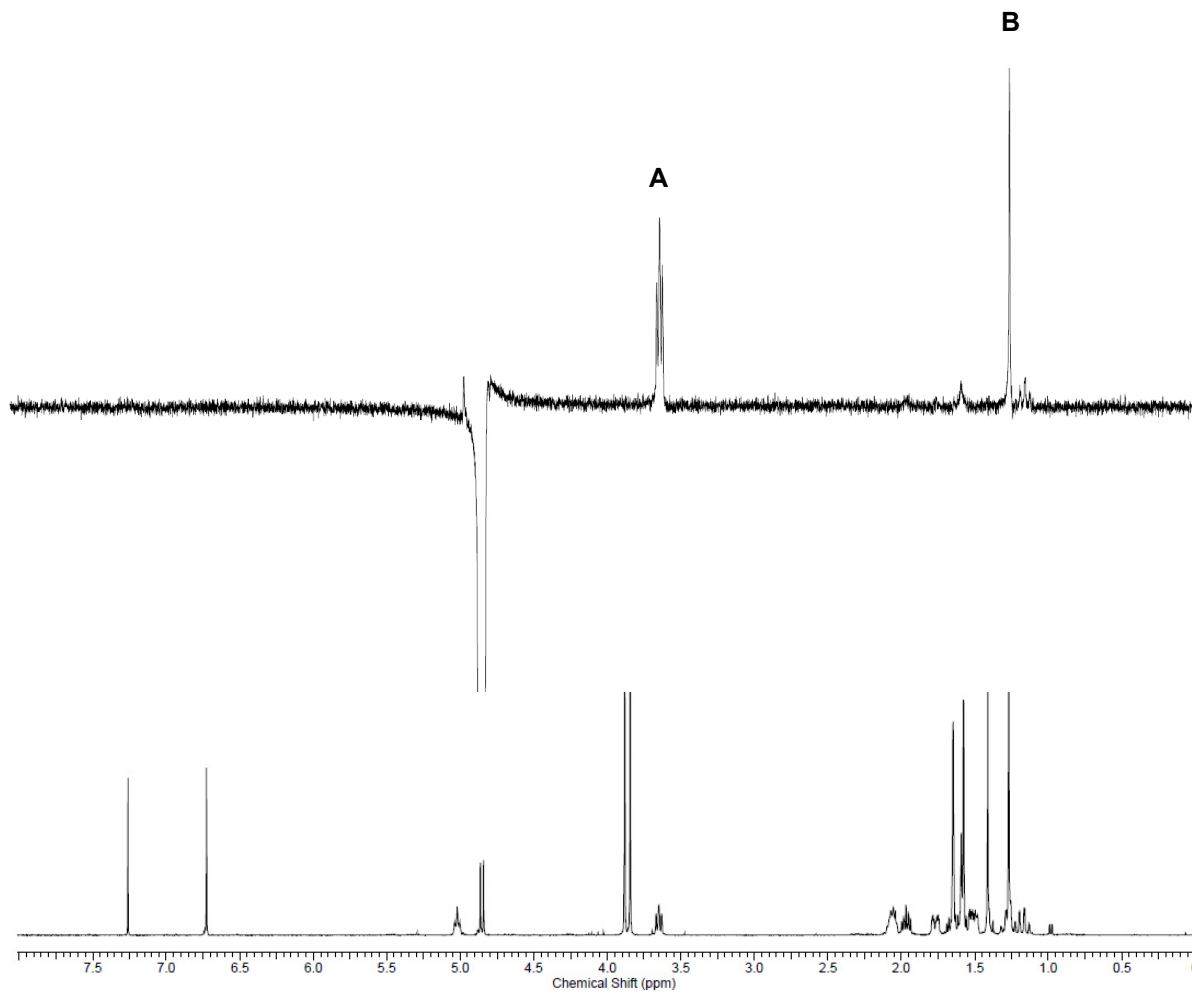

|                               |                                                                                      |                              |                      |                               |               |
|-------------------------------|--------------------------------------------------------------------------------------|------------------------------|----------------------|-------------------------------|---------------|
| <b>Acquisition Time (sec)</b> | 2.5625                                                                               | <b>Comment</b>               |                      |                               |               |
| <b>Date</b>                   | 18 Sep 2012 14:12:16                                                                 | <b>Date Stamp</b>            | 18 Sep 2012 14:12:16 |                               |               |
| <b>File Name</b>              | \IAMRGROB10025582.AMER.PFIZER.COM\BKDATA:DATA\AMENDC01\NMR\00701217-BISABOSQUAL1\FID |                              |                      |                               |               |
| <b>Frequency (MHz)</b>        | 399.54                                                                               | <b>Nucleus</b>               | 1H                   | <b>Number of Transients</b>   | 256           |
| <b>Origin</b>                 | spect                                                                                | <b>Original Points Count</b> | 16384                | <b>Owner</b>                  | FCNGRO-BRKO A |
| <b>Points Count</b>           | 16384                                                                                | <b>Pulse Sequence</b>        | zg30                 | <b>Receiver Gain</b>          | 322.00        |
| <b>SW(cyclical) (Hz)</b>      | 6393.86                                                                              | <b>Solvent</b>               | CHLOROFORM-d         | <b>Spectrum Offset (Hz)</b>   | 2385.7253     |
| <b>Spectrum Type</b>          | STANDARD                                                                             | <b>Sweep Width (Hz)</b>      | 6393.47              | <b>Temperature (degree C)</b> | 25.150        |

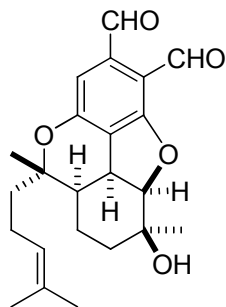

**Bisabosqual A (1)**  
<sup>1</sup>HNMR (400 MHz) in CDCl<sub>3</sub>

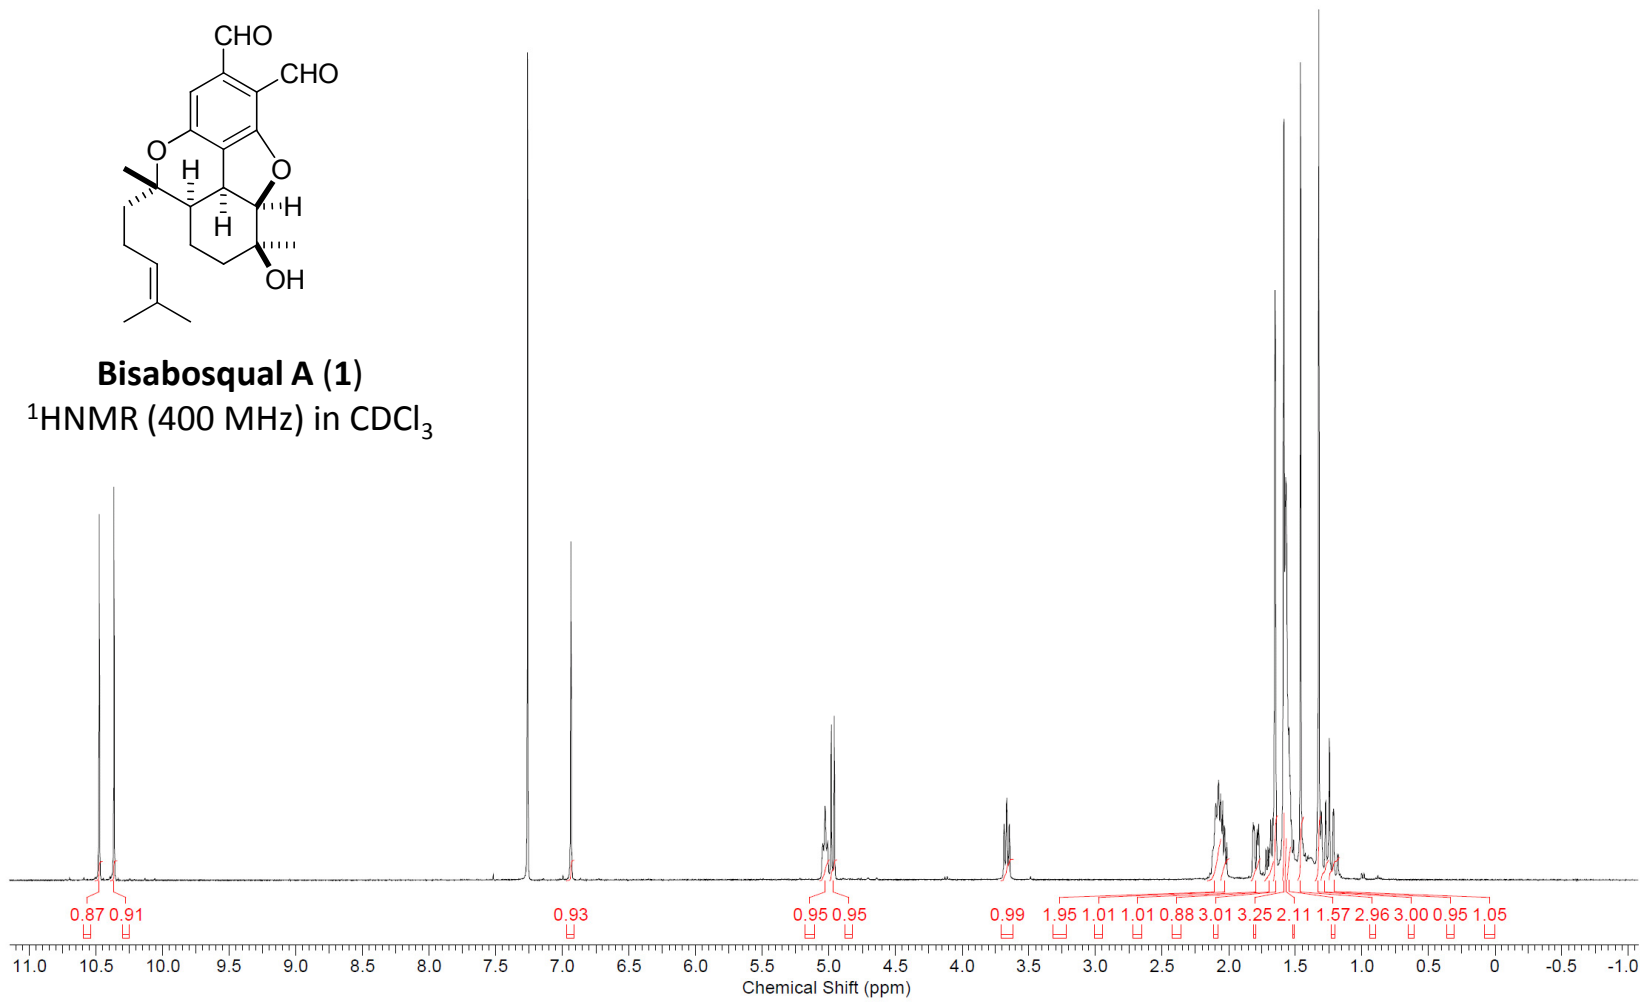

|                               |             |                       |                                                                                        |                             |             |                               |              |
|-------------------------------|-------------|-----------------------|----------------------------------------------------------------------------------------|-----------------------------|-------------|-------------------------------|--------------|
| <b>Acquisition Time (sec)</b> | 1.2788      | <b>Comment</b>        | 00701217-Bis-pure                                                                      |                             | <b>Date</b> | Sep 18 2012                   |              |
| <b>Date Stamp</b>             | Sep 18 2012 | <b>File Name</b>      | \\UNITYH.PFIZER.COM\AUTO\2012\20120918\00701217-BIS-PURE_20120918_01\CARBON_01.FID\FID |                             |             |                               |              |
| <b>Frequency (MHz)</b>        | 100.64      | <b>Nucleus</b>        | 13C                                                                                    | <b>Number of Transients</b> | 16384       | <b>Original Points Count</b>  | 28544        |
| <b>Points Count</b>           | 32768       | <b>Pulse Sequence</b> | s2pul                                                                                  | <b>Receiver Gain</b>        | 40.00       | <b>Solvent</b>                | CHLOROFORM-d |
| <b>Spectrum Offset (Hz)</b>   | 10063.7373  | <b>Spectrum Type</b>  | STANDARD                                                                               | <b>Sweep Width (Hz)</b>     | 22321.43    | <b>Temperature (degree C)</b> | 25.000       |

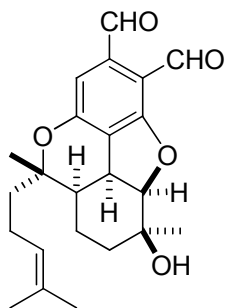

**Bisabosqual A (1)**  
<sup>13</sup>CNMR (100 MHz) in CDCl<sub>3</sub>

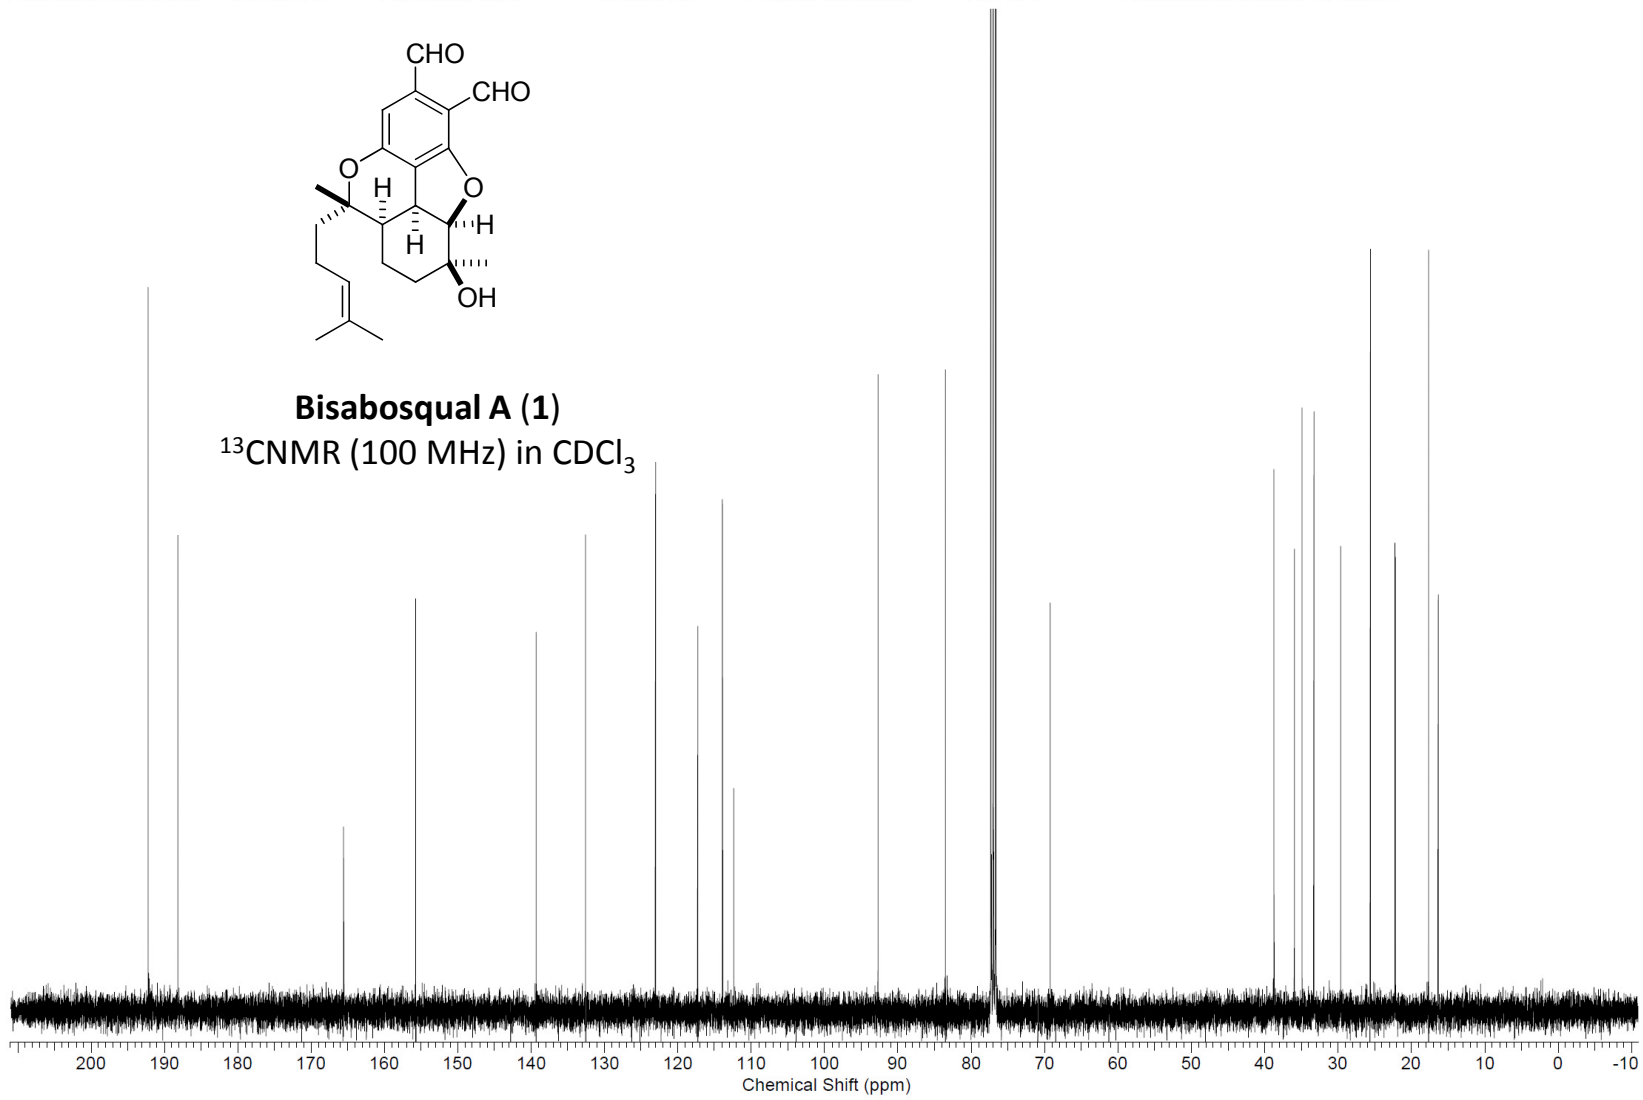

Supplement: NIHMS432182-supplement-1_si_001.pdf [file NIHMS432182-supplement-1_si_001.pdf]
